# Supplementary material for: Serum calcium and 25-hydroxyvitamin D in relation to longevity, cardiovascular disease and cancer: a Mendelian randomization study
Source: PubMed Central journal article supplement (PMC8516873; doi:10.1038/s41525-021-00250-4), 2021-10-14
Supplement: 41525_2021_250_MOESM1_ESM.pdf [file 41525_2021_250_MOESM1_ESM.pdf]

## Supplementary materials

### **Serum Calcium and 25-Hydroxyvitamin D in Relation to Longevity, Cardiovascular Disease and Cancer: A Mendelian Randomization Study**

*Shuai Yuan, John A. Baron, Karl Michaëlsson, Susanna C. Larsson*

**Supplementary Methods 1:** Meta-analysis of the long-term effects of calcium and calcium plus vitamin D supplementation on S-Ca

**Supplementary Methods 2:** Instrument selection for S-Ca in UK Biobank

**Supplementary Figure 1.** Long-term effect of calcium supplementation on S-Ca concentrations

**Supplementary Figure 2.** Long-term effect of calcium plus vitamin D supplementation on S-Ca concentrations

**Supplementary Figure 3.** Long-term effect of calcium supplementation on fasting S-Ca concentrations

**Supplementary Figure 4.** Long-term effect of calcium plus vitamin D supplementation on fasting S-Ca concentrations

**Supplementary Figure 5.** Funnel plots for two meta-analyses

**Supplementary Table 1.** Used studies and consortia in the present study

**Supplementary Table 2.** Diagnostic information for cardiovascular disease and cancer in FinnGen

**Supplementary Table 3.** Associations of genetically predicted serum calcium and 25(OH)D with parent lifespans

**Supplementary Table 4.** Associations of genetically predicted serum calcium and 25(OH)D with longevity in sensitivity analyses

**Supplementary Table 5.** Associations of genetically predicted serum calcium and 25(OH)D with cardiovascular disease and cancer in sensitivity analyses

**Supplementary Table 6.** Data for analyses of serum calcium

**Supplementary Table 7.** Data for analyses of serum 25(OH)D

## **Supplementary Methods 1:** Meta-analysis of long-term effects of calcium and calcium plus vitamin D supplementations on S-Ca

### **Meta-analysis procedure**

Studies included in the meta-analysis those in a published meta-analysis assessing calcium and calcium plus vitamin D supplementations in relation to bone mineral density (Tai V et al, 2015, BMJ). That meta-analysis included 32 clinical trials of calcium supplementation of which seven reported data on S-Ca concentrations after the calcium supplement intervention and were included here. The meta-analysis also included 19 trials of supplementation with calcium plus vitamin D. Of these, seven provided data for total S-Ca and were included in the present meta-analysis. In sensitivity analyses of calcium supplements alone, we excluded the Recker et al, 1977 study (as participants were restricted to a low-calcium diet) and the Ruml et al, 1999 study that provided no information about fasting status. In the analysis of calcium plus vitamin D supplementation we excluded the studies by Baeksgaard et al, 1998, Doetsch et al, 2004 and Harwood et al, 2004 since they did not indicate that bloods were obtained fasting, the Meier et al, 2004 study since bloods were not obtained fasting post-treatment, and Chapuy et al, 2002 since participants with osteomalacia were included.

**Statistical analysis:** Both fixed and random effects inverse variance weighted models were used to estimate the mean difference in means of S-Ca from included studies. We manually converted reported S-Ca data in other units to mmol/L across studies and aimed to estimate a pooled mean difference in absolute concentrations, rather than a standardized difference. The  $I^2$  statistic was calculated to assess heterogeneity among

estimates from different studies. The funnel plot and egger test were used to assess publication bias. The meta-analysis was performed using “metan” package in Stata/SE 15.0.

**Table 1. Included studies in the meta-analysis of long-term effects of calcium supplementation on S-Ca concentrations**

| No | Study                   | Setting     | Mean age | N-treatment | N-control | Calcium dose (mg/d) | Duration | Fasting blood | Diet        | Treatment <sup>a</sup> |      | Placebo <sup>a</sup> |      |
|----|-------------------------|-------------|----------|-------------|-----------|---------------------|----------|---------------|-------------|------------------------|------|----------------------|------|
|    |                         |             |          |             |           |                     |          |               |             | Mean                   | SD   | Mean                 | SD   |
| 1  | Recker et al, 1977      | Community   | 57       | 14          | 12        | 1040                | 2 y      | Yes           | Low calcium | 2.40                   | 0.16 | 2.35                 | 0.62 |
| 2  | Lau et al, 1992         | Institution | 76       | 12          | 12        | 800                 | 10 mon   | Yes           | Normal      | 2.33                   | 0.04 | 2.18                 | 0.16 |
| 3  | Riggs et al, 1998       | Community   | 66       | 88          | 89        | 1600                | 4 y      | Yes           | Normal      | 2.40                   | 0.10 | 2.38                 | 0.06 |
| 4  | Ruml et al, 1999        | Community   | 52       | 17          | 28        | 800                 | 2 y      | NA            | Normal      | 2.40                   | 0.08 | 2.43                 | 0.08 |
| 5  | Son et al, 2001         | Community   | 72       | 22          | 21        | 1000                | 10 mon   | Yes           | Normal      | 2.35                   | 0.35 | 2.24                 | 0.43 |
| 6  | Rajatanavin et al, 2010 | Community   | 66       | 178         | 165       | 500                 | 2 y      | Yes           | Normal      | 2.46                   | 0.10 | 2.41                 | 0.10 |
| 7  | Nakamura et al, 2012    | Community   | 60       | 142         | 137       | 500                 | 2 y      | Yes           | Normal      | 2.29                   | 0.08 | 2.27                 | 0.10 |

Units of S-Ca were scaled to mmol/L across studies. Mean values present post-treatment S-Ca concentrations. <sup>a</sup> these are post-treatment values.

**Table 2. Included studies in the meta-analysis of long-term effects of calcium plus vitamin D supplementation on S-Ca concentrations**

| No | Study                  | Setting     | Mean age | N-treatment | N-control | Calcium dose (mg/d) | VD dose (IU/d) | Duration | Fasting blood | Diet   | Treatment <sup>a</sup> |      | Placebo <sup>a</sup> |      |
|----|------------------------|-------------|----------|-------------|-----------|---------------------|----------------|----------|---------------|--------|------------------------|------|----------------------|------|
|    |                        |             |          |             |           |                     |                |          |               |        | Mean                   | SD   | Mean                 | SD   |
| 1  | Orwoll et al, 1990     | Community   | 58       | 41          | 36        | 1000                | 1000           | 3 y      | Yes           | Normal | 2.37                   | 0.10 | 2.36                 | 0.10 |
| 2  | Baeksgaard et al, 1998 | Community   | 62       | 65          | 63        | 1000                | 560            | 2 y      | NA            | Normal | 2.39                   | 0.11 | 2.35                 | 0.10 |
| 3  | Chapuy et al, 2002     | Institution | 85       | 137         | 127       | 1200                | 800            | 2 y      | Yes           | Normal | 2.32                   | 0.13 | 2.27                 | 0.13 |
| 4  | Doetsch et al, 2004    | Community   | NA       | 16          | 14        | 1000                | 800            | 6 w      | NA            | Normal | 2.38                   | 0.09 | 2.27                 | 0.09 |
| 5  | Harwood et al, 2004    | Community   | 81       | 75          | 75        | 1000                | 800            | 1 y      | NA            | Normal | 2.42                   | 0.18 | 2.40                 | 0.20 |
| 6  | Meier et al, 2004      | Community   | 56       | 27          | 16        | 500                 | 500            | 6 mon    | No            | Normal | 2.34                   | 0.06 | 2.35                 | 0.08 |
| 7  | Zhu et al, 2008        | Community   | 75       | 39          | 41        | 1200                | 1000           | 3 y      | Yes           | Normal | 2.42                   | 0.07 | 2.36                 | 0.12 |

Units of S-Ca were scaled to mmol/L across studies. Mean values present post-treatment S-Ca concentrations. <sup>a</sup> these are post-treatment values.

## References:

1. Tai V, Leung W, Grey A, Reid IR, Bolland MJ. Calcium intake and bone mineral density: systematic review and meta-analysis. *BMJ*. 2015;351:h4183.
2. Recker RR, Saville PD, Heaney RP. Effect of estrogens and calcium carbonate on bone loss in postmenopausal women. *Ann Intern Med*. 1977;87(6):649-55.
3. Lau EM, Woo J, Leung PC, Swaminathan R, Leung D. The effects of calcium supplementation and exercise on bone density in elderly Chinese women. *Osteoporos Int*. 1992;2(4):168-73.
4. Riggs BL, O'Fallon WM, Muhs J, O'Connor MK, Kumar R, Melton LJ 3rd. Long-term effects of calcium supplementation on serum parathyroid hormone level, bone turnover, and bone loss in elderly women. *J Bone Miner Res*. 1998;13(2):168-74.
5. Ruml LA, Sakhaee K, Peterson R, Adams-Huet B, Pak CY. The effect of calcium citrate on bone density in the early and mid-postmenopausal period: a randomized placebo-controlled study. *Am J Ther*. 1999;6(6):303-11.
6. Son SM, Chun YN. Effect of oral therapy with alphacalcidol or calcium in Korean elderly women with osteopenia and low dietary calcium. *Nutr Res*. 2001;21:1347-55.
7. Rajatanavin R, Chailurkit L, Saetung S, Thakkinstian A, Nimitphong H. The efficacy of calcium supplementation alone in elderly Thai women over a 2-year period: a randomized controlled trial. *Osteoporos Int*. 2013;24(11):2871-7.
8. Nakamura K, Saito T, Kobayashi R, Oshiki R, Kitamura K, Oyama M, Narisawa S, Nashimoto M, Takahashi S, Takachi R. Effect of low-dose calcium supplements on bone loss in perimenopausal and postmenopausal Asian women: a randomized controlled trial. *J Bone Miner Res*. 2012;27(11):2264-70.
9. Orwoll ES, Oviatt SK, McClung MR, Deftos LJ, Sexton G. The rate of bone mineral loss in normal men and the effects of calcium and cholecalciferol supplementation. *Ann Intern Med*. 1990;112:29-34.
10. Baeksgaard L, Andersen KP, Hyldstrup L. Calcium and vitamin D supplementation increases spinal BMD in healthy, postmenopausal women. *Osteoporos Int*. 1998;8:255-60.
11. Chapuy MC, Pamphile R, Paris E, et al. Combined calcium and vitamin D3 supplementation in elderly women: confirmation of reversal of secondary hyperparathyroidism and hip fracture risk: the Decalyos II study. *Osteoporos Int*. 2002;13:257-64.
12. Doetsch AM, Faber J, Lynnerup N, Watjen I, Bliddal H, Danneskiold-Samsoe B. The effect of calcium and vitamin D3 supplementation on the healing of the proximal humerus fracture: a randomized placebo-controlled study. *Calcif Tissue Int*. 2004;75:183-8.
13. Harwood RH, Sahota O, Gaynor K, Masud T, Hosking DJ. A randomised, controlled comparison of different calcium and vitamin D supplementation regimens in elderly women after hip fracture: the Nottingham Neck of Femur (NONOF) Study. *Age Ageing*. 2004;33:45-51.
14. Meier C, Woitge HW, Witte K, Lemmer B, Seibel MJ. Supplementation with oral vitamin D3 and calcium during winter prevents seasonal bone loss: a randomized controlled open-label prospective trial. *J Bone Miner Res*. 2004;19:1221-30.
15. Zhu K, Devine A, Dick IM, Wilson SG, Prince RL. Effects of calcium and vitamin D supplementation on hip bone mineral density and calcium-related analytes in elderly ambulatory Australian women: a five-year randomized controlled trial. *J Clin Endocrinol Metab*. 2008;93:743-9.

## Supplementary Methods 2: Instrument selection for S-Ca in UK Biobank

Instrumental selection for S-Ca in the UK Biobank was based on summary-level data from the Neale lab (the second-round results of analysis, <http://www.nealelab.is/uk-biobank>). Among participants in the UK Biobank study, those who were closely related (or at least one of a related pair of individuals) and those with sex chromosome aneuploidies were excluded. The Neale lab imputed genotypes using HRC plus UK10K & 1000 Genomes reference panels. In quality control, they excluded genetic variants with minor allele frequency <0.1% and Hardy-Weinberg equilibrium  $p$ -value < $1 \times 10^{-10}$  and an info score <0.8. Genome-wide association tests were adjusted for age, sex and up to 20 genetic principal components. Detailed information on sample selection, phenotype definition and genome-wide association test models can be found in the webpages for the Neale lab and UK Biobank (<http://www.nealelab.is/uk-biobank>). The code for data imputation and GWAS analysis can be found at [https://github.com/Nealelab/UK\\_Biobank\\_GWAS](https://github.com/Nealelab/UK_Biobank_GWAS). Based on this summary-level data, we first selected all SNPs associated with S-Ca at  $p < 5 \times 10^{-8}$ . Among SNPs remained, independent SNPs were selected by the definition of linkage disequilibrium  $r^2 < 0.001$  and clumping distance at 10,000 kb. Instrument selection was performed in MR-Base platform (<https://www.mrbase.org/>).

**Supplementary Figure 1.** Long-term effect of calcium supplementation on S-Ca concentrations

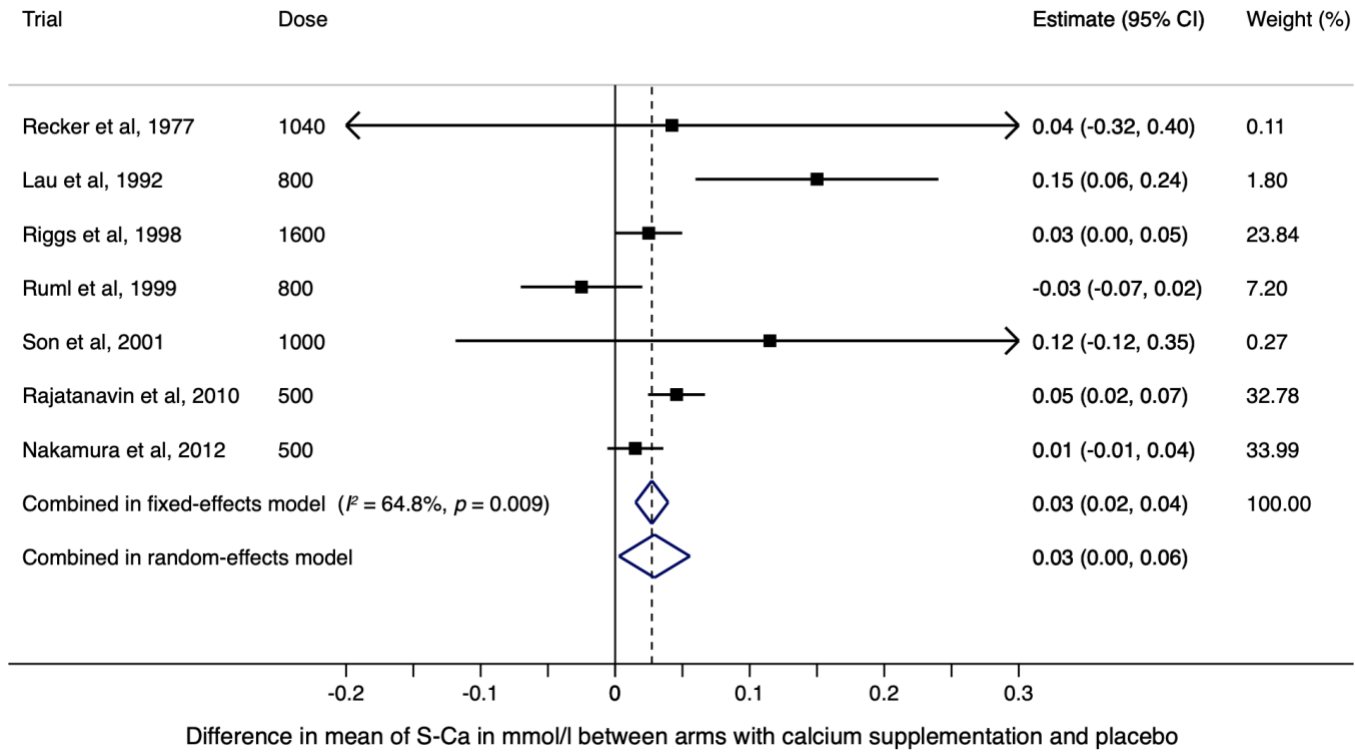

**Supplementary Figure 2.** Long-term effect of calcium plus vitamin D supplementation on S-Ca concentrations

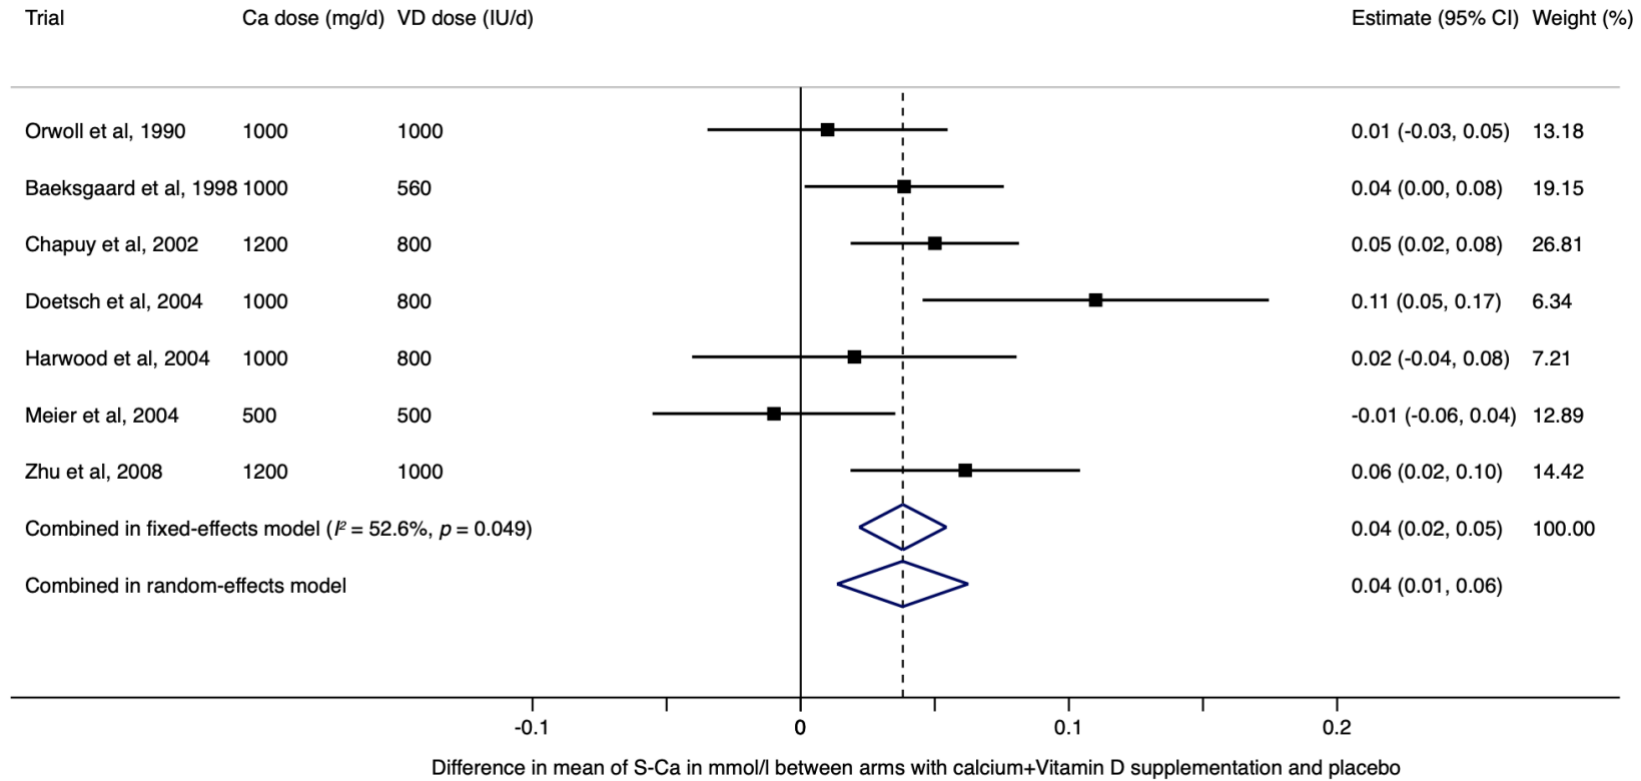

**Supplementary Figure 3.** Long-term effect of calcium supplementation on fasting S-Ca concentrations

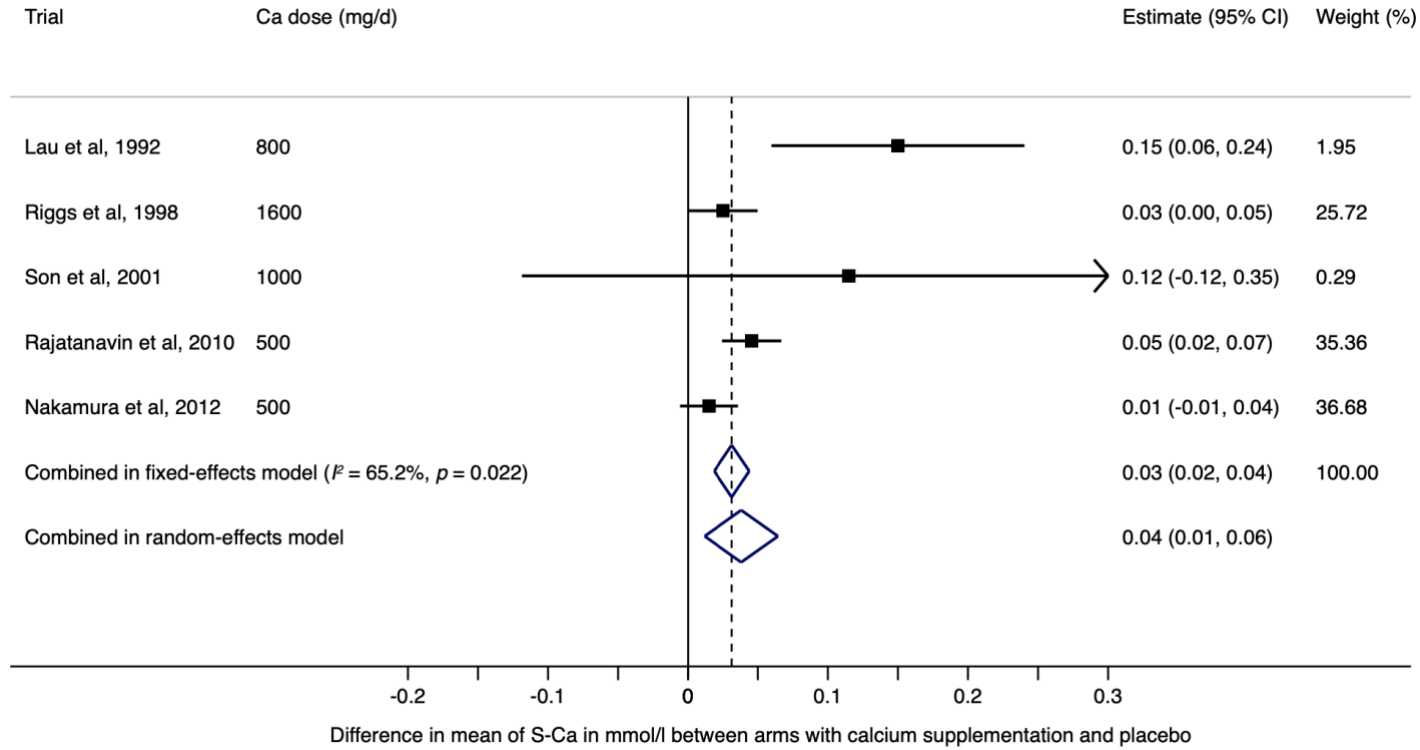



**Supplementary Figure 4.** Long-term effect of calcium plus vitamin D supplementation on fasting S-Ca concentrations

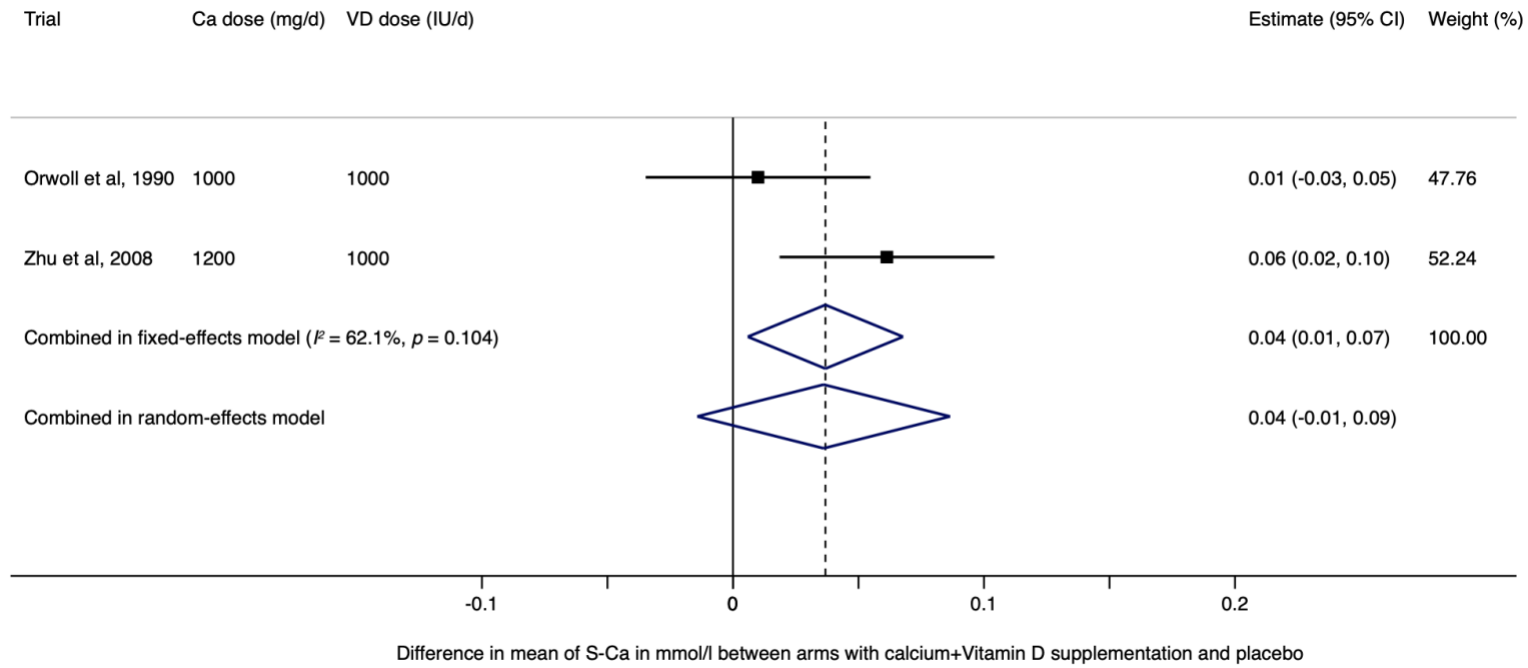

Supplementary Figure 5. Funnel plots for two meta-analyses

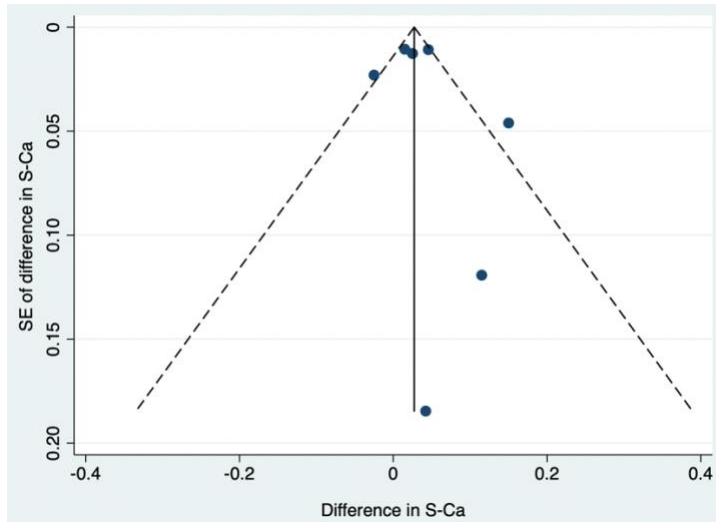

Meta-analysis of calcium supplementation

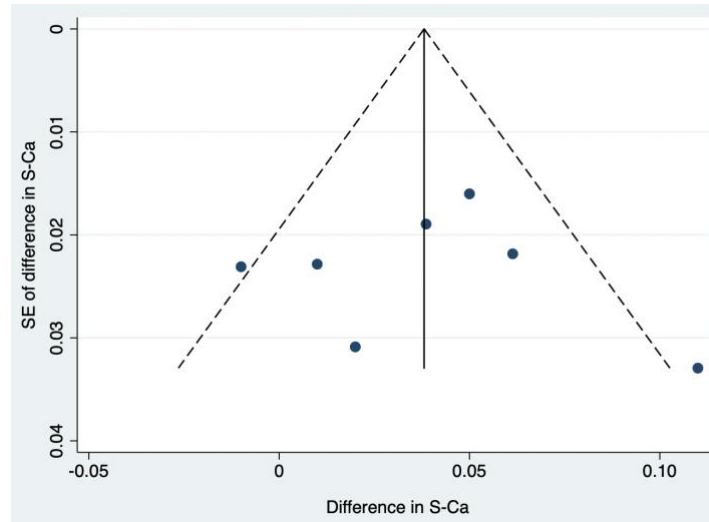

Meta-analysis of calcium plus vitamin D supplementation

**Supplementary Table 1.** Studies and consortia used in the present study

| Exposure or outcome    | Data source                              | Participants <sup>a</sup>                                                                                                                                                                                                                                                                                                     | PubMed ID or webpage                                                                 |
|------------------------|------------------------------------------|-------------------------------------------------------------------------------------------------------------------------------------------------------------------------------------------------------------------------------------------------------------------------------------------------------------------------------|--------------------------------------------------------------------------------------|
| Serum calcium          | Meta-analysis of GWASs                   | Up to 61,054 participants of European ancestry from the discovery (17 studies) and replication (11 studies) stages                                                                                                                                                                                                            | <a href="#">24068962</a>                                                             |
| Serum calcium          | UK Biobank                               | 315,153 participants of European ancestry from the UK Biobank study                                                                                                                                                                                                                                                           | <a href="http://www.nealelab.is/uk-biobank">http://www.nealelab.is/uk-biobank</a>    |
| Serum 25(OH)D          | Meta-analysis of GWASs                   | 42,274 participants of European ancestry for rs117913124 and 79,366 participants of European ancestry for other six SNPs                                                                                                                                                                                                      | rs117913124 ( <a href="#">28757204</a> ) and other SNPs ( <a href="#">29343764</a> ) |
| Serum 25(OH)D          | UK Biobank                               | 417,580 participants of European ancestry from the UK Biobank study                                                                                                                                                                                                                                                           | <a href="#">32242144</a>                                                             |
| Longevity              | Meta-analysis of GWASs (Deelen J, et al) | 11,262 European-descent participants who lived beyond an age at or above the 90 <sup>th</sup> survival percentile (as cases) and 25,483 controls who died at or before the age at the 60 <sup>th</sup> survival percentile or whose age at the last follow-up visit was at or before the 60 <sup>th</sup> survival percentile | <a href="#">31413261</a>                                                             |
| Longevity              | UK Biobank (Pilling LC, et al)           | 7,182 European-descent participants whose both parents with longevity in top 10% and 79,767 controls                                                                                                                                                                                                                          | <a href="#">27015805</a>                                                             |
| Cardiovascular disease | FinnGen consortium                       | 111,108 Finnish-descent participants with at least one cardiovascular disease and 107,684 controls                                                                                                                                                                                                                            | <a href="https://www.finngen.fi/fi">https://www.finngen.fi/fi</a>                    |
| Cancer                 | FinnGen consortium                       | 38,036 Finnish-descent participants with at least one malignant neoplasm and 180,756 controls                                                                                                                                                                                                                                 | <a href="https://www.finngen.fi/fi">https://www.finngen.fi/fi</a>                    |

<sup>a</sup> The GWASs included in the meta-analysis for calcium are listed in Text S1: <https://journals.plos.org/plosgenetics/article?id=10.1371/journal.pgen.1003796#s5>. The GWASs included in the meta-analysis for 25(OH)D are listed in the Methods part: <https://www.nature.com/articles/s41467-017-02662-2#Sec9> and in the Table 1 (for rs117913124): [https://www.cell.com/ajhg/fulltext/S0002-9297\(17\)30277-X#secsectitle0060](https://www.cell.com/ajhg/fulltext/S0002-9297(17)30277-X#secsectitle0060). Meta-analyses of GWAS for both calcium and 25(OH)D did not include UK Biobank study. The summary-level data of the meta-analysis of GWAS on longevity was based on the discovery and replication stages, where individuals GWAS was list in Table 1: <https://www.nature.com/articles/s41467-019-11558-2#data-availability> (this meta-analysis of GWAS on longevity did not include the UK Biobank study).

**Supplementary Table 2.** Diagnostic information for cardiovascular disease and cancer in FinnGen

| Included outcomes                  |                                                      | Diagnostic information                                                                                                                           |
|------------------------------------|------------------------------------------------------|--------------------------------------------------------------------------------------------------------------------------------------------------|
| Primary outcome                    | Secondary outcome                                    | Hospital discharge registry                                                                                                                      |
| Heart disease<br>(rheumatic fever) | Rheumatic fever with heart involvement               | ICD-10: I020/I01, ICD-9: 391, ICD-8: 391                                                                                                         |
|                                    | Rheumatic fever without mention of heart involvement | ICD-10: I029/I00, ICD-9: 390, ICD-8: 390                                                                                                         |
|                                    | Rheumatic valve diseases                             | ICD-10: I05/I06/I08/I07, ICD-9: 394/395/396, ICD-8: 3940 3950 3960 3970                                                                          |
|                                    | Rheumatic heart disease, other                       | ICD-10: I09, ICD-9: 3920A/397/393/398, ICD-8: 3920 393 3979 398                                                                                  |
| Hypertensive<br>diseases           | Hypertension, Pulmonary Arterial                     | ICD-10: I270, ICD-9: 4160A, ICD-8: 42600                                                                                                         |
|                                    | Hypertensive heart and/or renal disease              | ICD-10: I11/I13/I12, ICD-9: 4029A/4029B/4039A/4040A, ICD-8: 40299 40399 40499                                                                    |
|                                    | Hypertension                                         | ICD-10: I13/I674/I11/I10/I12/I15, ICD-9: 4019X/4029A/4029B/4039A/4040A/4059A/4059B/4059X/4372A, ICD-8: 400 401 402 403 404                       |
|                                    | Angina pectoris                                      | ICD-10: I20, ICD-9: 413, ICD-8: 413                                                                                                              |
| Ischemic heart<br>diseases         | Myocardial infarction                                | ICD-10: I22/I21, ICD-9: 410, ICD-8: 410                                                                                                          |
|                                    | Complications following myocardial infarction        | ICD-10: I23                                                                                                                                      |
|                                    | Status post-ami                                      | ICD-10: I253, ICD-9: 412, ICD-8: 412                                                                                                             |
|                                    | Coronary atherosclerosis                             | ICD-10: T822/Z951/I25/I24, ICD-9: 414/9960A, ICD-8: 414                                                                                          |
|                                    | Coronary angioplasty                                 | Operation codes: ^FNF ^FNG ^TFN40 ^FN1AT ^FN1BT ^FN1YT, ^82\$ ^83\$ ^84\$, ^AN2 ^AN3 ^AN4 ^ANA ^ANB                                              |
|                                    | Coronary artery bypass grafting                      | Operation codes: ^FNA ^FNB ^FNC ^FND ^FNE, ^5311\$ ^5312\$ ^5313\$ ^5314\$ ^5315\$, ^11\$ ^25\$ ^111\$ ^112\$ ^113\$ ^119\$, ^AA1 ^AA2 ^AA3 ^AAX |
| Pulmonary heart<br>disease         | Pulmonary embolism                                   | ICD-10: I26, ICD-9: 415, ICD-8: 450                                                                                                              |
|                                    | Other pulmonary heart/vessel disease                 | ICD-10: I28/I27, ICD-9: 416/417, ICD-8: 426                                                                                                      |
|                                    | Pericarditis                                         | ICD-10: I30/I32, ICD-9: 420, ICD-8: 420                                                                                                          |
|                                    | Other diseases of pericardium                        | ICD-10: I31, ICD-9: 423, ICD-8: 423                                                                                                              |
|                                    | Endocarditis                                         | ICD-10: I38/I39/I33, ICD-9: 0932A/421, ICD-8: 421                                                                                                |
|                                    | Non-rheumatic valve diseases                         | ICD-10: I35/I34/I36/I37, ICD-9: 424, ICD-8: 39[4-6]65 424                                                                                        |
| Other heart<br>diseases            | Valvular operations                                  | ^FGA ^FGC ^FGD ^FGE ^FGW ^F^JE ^F^JF ^FK ^FM, ^5261\$ ^527 ^528 ^529 ^530                                                                        |
|                                    | Myocarditis                                          | ICD-10: I41/I40, ICD-9: 422, ICD-8: 0742 422                                                                                                     |
|                                    | Cardiomyopathy                                       | ICD-10: I42                                                                                                                                      |
|                                    | Conduction disorders                                 | ICD-10: I44/I45, ICD-9: 426                                                                                                                      |
|                                    | Cardiac arrest                                       | ICD-10: I46, ICD-9: 4275A, ICD-8: 4272                                                                                                           |

|                                                  |                                                                |                                                                                                           |
|--------------------------------------------------|----------------------------------------------------------------|-----------------------------------------------------------------------------------------------------------|
|                                                  | Paroxysmal tachycardia                                         | ICD-10: I47, ICD-8: 4275                                                                                  |
|                                                  | Atrial fibrillation and flutter                                | ICD-10: I48, ICD-8: 42792                                                                                 |
|                                                  | Heart failure, strict                                          | ICD-10: I50/I130/I132/I110, ICD-9: 4029B/428, ICD-8: 42700 42710 428 7824                                 |
|                                                  | Other arrhythmias                                              | ICD-10: I49, ICD-9: 427, ICD-8: 42798, exclude ICD-9: 4273, ICD-8: 42792                                  |
|                                                  | Other or ill-defined heart diseases                            | ICD-10: I52/I51, ICD-9: 429, ICD-8: 42899 42999                                                           |
|                                                  | Subarachnoid haemorrhage                                       | ICD-10: I60, ICD-9: 430, ICD-8: 430                                                                       |
|                                                  | Intracerebral haemorrhage                                      | ICD-10: I61, ICD-9: 431, ICD-8: 431                                                                       |
|                                                  | Other intracranial haemorrhages                                | ICD-10: I62                                                                                               |
|                                                  | Ischaemic stroke                                               | ICD-10: I63/I64, ICD-9: 436/4340A/4331A/4330A/4349A/4341A/4339A, ICD-8: 433 434 436, exclude ICD-10: I636 |
|                                                  | Occlusion and stenosis of arteries, not leading to stroke      | ICD-10: I66, ICD-9: 4330X/4331X/4339X                                                                     |
|                                                  | Dissection of cerebral arteries, nonruptured                   | ICD-10: I670                                                                                              |
|                                                  | Cerebral aneurysm, nonruptured                                 | ICD-10: I671                                                                                              |
| Cerebrovascular diseases                         | Endovascular or surgical operations to intracerebral aneurysms | Operation codes: ^AAC0 ^AAC1 ^AAC9 ^AAL0, ^2161 ^2162 ^2163 ^2164 ^2165 ^2169 ^2160 ^2166 ^2167 ^2168     |
|                                                  | Cerebral atherosclerosis                                       | ICD-10: I672, ICD-8: 437                                                                                  |
|                                                  | Progressive vascular leukoencephalopathy                       | ICD-10: I673                                                                                              |
|                                                  | Hypertensive encephalopathy                                    | ICD-10: I674                                                                                              |
|                                                  | Moyamoya                                                       | ICD-10: I675                                                                                              |
|                                                  | Nonpyogenic thrombosis of intracranial venous system           | ICD-10: I676                                                                                              |
|                                                  | Cerebral arteritis                                             | ICD-10: I677/I682                                                                                         |
|                                                  | Other specified cerebrovascular diseases                       | ICD-10: I688/I678/I679, ICD-9: 436/4378X, ICD-8: 438                                                      |
|                                                  | Cerebral amyloid angiopathy                                    | ICD-10: I680                                                                                              |
|                                                  | Sequelae of cerebrovascular disease                            | ICD-10: I69, ICD-9: 438                                                                                   |
|                                                  | Atherosclerosis, excluding cerebral, coronary and PAD          | ICD-10: I70, ICD-9: 440, ICD-8: 440                                                                       |
|                                                  | Aortic aneurysm                                                | ICD-10: I718/I713/I711/I712/I716/I719/I714/I715, ICD-9: 0930A, ICD-8: 0930 441                            |
|                                                  | Other aneurysm                                                 | ICD-10: I72, ICD-9: 442, ICD-8: 442                                                                       |
|                                                  | Other peripheral vascular diseases                             | ICD-10: I73, ICD-9: 443, ICD-8: 443                                                                       |
| Diseases of arteries, arterioles and capillaries | Embolism and thrombosis of abdominal aorta                     | ICD-10: I740, ICD-9: 4440A, ICD-8: 44400, exclude ICD-10: 4440                                            |
|                                                  | Arterial embolism and thrombosis of lower extremity artery     | ICD-10: I743, ICD-9: 4442A                                                                                |
|                                                  | Other arterial embolism and thrombosis                         | ICD-10: I74, ICD-9: 444, ICD-8: 444, exclude ICD-10: I743 I740; ICD-9: 4440A 4442A, ICD-8: 4440           |
|                                                  | Other diseases of arteries and capillaries                     | ICD-10: I77/I78, ICD-9: 447/448, ICD-8: 447 448                                                           |
|                                                  | Peripheral artery disease                                      | ICD-10: E105/E145/E135/I739/E125/E115/I702, ICD-8: 25006 4402 4439                                        |
|                                                  | Vascular diseases of the intestine                             | ICD-10: K550/K551/K559, ICD-9: 557, ICD-8: 4442                                                           |

|                                                                                |                                                                                       |                                                                                      |
|--------------------------------------------------------------------------------|---------------------------------------------------------------------------------------|--------------------------------------------------------------------------------------|
| Diseases of veins, lymphatic vessels and lymph nodes, not elsewhere classified | Phlebitis and thrombophlebitis (not including DVT)                                    | ICD-10: I80, ICD-9: 4518X/4519X, ICD-8: 451, exclude IVD-10: I802 I803, ICD-8: 4510. |
|                                                                                | DVT of lower extremities                                                              | ICD-10: I803, ICD-9: 4510A/4511A/4512A, ICD-8: 4510                                  |
|                                                                                | Portal vein thrombosis                                                                | ICD-10: I81, ICD-9: 452, ICD-8: 452                                                  |
|                                                                                | Other embolism and thrombosis                                                         | ICD-10: I82, ICD-9: 453, ICD-8: 453                                                  |
|                                                                                | Varicose veins                                                                        | ICD-10: I83, ICD-9: 454, ICD-8: 454                                                  |
|                                                                                | Oesophageal varices                                                                   | ICD-10: I85, ICD-8: 4560                                                             |
|                                                                                | Varicose veins of other sites                                                         | ICD-10: I86, ICD-9: 456, ICD-8: 456, exclude ICD-9: 456[0-1], ICD-8: 4560            |
|                                                                                | Other disorders of veins                                                              | ICD-10: I87                                                                          |
|                                                                                | Nonspecific lymphadenitis                                                             | ICD-10: I88, ICD-8: 289[1-3]                                                         |
|                                                                                | Other noninfective disorders of lymphatic vessels and lymph nodes                     | ICD-10: I89, ICD-9: 457, ICD-8: 457                                                  |
| Other CVD                                                                      | Hypotension                                                                           | ICD-10: I95, ICD-9: 458, ICD-8: 4580                                                 |
|                                                                                | Other other unspecified disorders of the circulatory system                           | ICD-10: I99/I97, ICD-9: 4590A, ICD-8: 4581 4589                                      |
| Malignant neoplasm of lip, oral cavity and pharynx                             | Malignant neoplasm of base of tongue                                                  | ICD-10: C01, ICD-9: 1410A, ICD-8: 1410                                               |
|                                                                                | Malignant neoplasm of other and unspecified parts of tongue                           | ICD-10: C02, ICD-9: 141, ICD-8: 141, exclude ICD-9: 1410A, ICD-8: 1410.              |
|                                                                                | Malignant neoplasm of floor of mouth                                                  | ICD-10: C04, ICD-9: 144, ICD-8: 144                                                  |
|                                                                                | Malignant neoplasm of other and unspecified parts of mouth                            | ICD-10: C06, ICD-9: 145, ICD-8: 145                                                  |
|                                                                                | Malignant neoplasm of tonsil                                                          | ICD-10: C09, ICD-9: 1460A, ICD-8: 1460                                               |
|                                                                                | Malignant neoplasm of oropharynx                                                      | ICD-10: C10, ICD-9: 146, ICD-8: 146, exclude ICD-9: 1460A                            |
|                                                                                | Malignant neoplasm of nasopharynx                                                     | ICD-10: C11, ICD-9: 147, ICD-8: 147                                                  |
|                                                                                | Malignant neoplasm of piriform sinus                                                  | ICD-10: C12, ICD-9: 1481A, ICD-8: 1481                                               |
|                                                                                | Malignant neoplasm of hypopharynx                                                     | ICD-10: C13, ICD-9: 148, ICD-8: 148, exclude ICD-9: 1481A, ICD-8: 1481               |
|                                                                                | Malignant neoplasm of other and ill-defined sites in the lip, oral cavity and pharynx | ICD-10: C14, ICD-9: 149, ICD-8: 149                                                  |
| Malignant neoplasm of digestive organs                                         | Malignant neoplasm of oesophagus                                                      | ICD-10: C15, ICD-9: 150, ICD-8: 150                                                  |
|                                                                                | Malignant neoplasm of stomach                                                         | ICD-10: C16, ICD-9: 151, ICD-8: 151                                                  |
|                                                                                | Malignant neoplasm of small intestine                                                 | ICD-10: C17, ICD-9: 152, ICD-8: 152                                                  |
|                                                                                | Malignant neoplasm of colon                                                           | ICD-10: C18, ICD-9: 153, ICD-8: 153                                                  |
|                                                                                | Malignant neoplasm of rectosigmoid junction                                           | ICD-10: C19, ICD-8: 1540                                                             |
|                                                                                | Malignant neoplasm of rectum                                                          | ICD-10: C20, ICD-9: 154, ICD-8: 1541                                                 |
|                                                                                | Malignant neoplasm of anus and anal canal                                             | ICD-10: C21, ICD-8: 1542                                                             |
|                                                                                | Malignant neoplasm of liver and intrahepatic bile ducts                               | ICD-10: C22, ICD-9: 155, ICD-8: 155                                                  |
|                                                                                | Malignant neoplasm of gallbladder                                                     | ICD-10: C23, ICD-8: 1560                                                             |

|                                                    |                                                                                   |                                                                           |
|----------------------------------------------------|-----------------------------------------------------------------------------------|---------------------------------------------------------------------------|
|                                                    | Malignant neoplasm of other and unspecified parts of biliary tract                | ICD-10: C24, ICD-9: 156, ICD-8: 156                                       |
|                                                    | Malignant neoplasm of other and ill-defined digestive organs                      | ICD-10: C26, ICD-9: 158/159, ICD-8: 15[8-9]                               |
|                                                    | Malignant neoplasm of pancreas                                                    | ICD-10: C25, ICD-9: 157, ICD-8: 157                                       |
| Malignant neoplasm of bone and articular cartilage | Malignant neoplasm of bone and articular cartilage of limbs                       | ICD-10: C40, ICD-8: 170[4-5]   170[7-8]                                   |
|                                                    | Malignant neoplasm of bone and articular cartilage of other and unspecified sites | ICD-10: C41, ICD-9: 170, ICD-8: 170                                       |
| Malignant neoplasm of skin                         | Malignant melanoma of skin                                                        | ICD-10: C43, ICD-9: 172, ICD-8: 172                                       |
|                                                    | Non-melanoma skin cancer                                                          | ICD-10: C44, ICD-9: 173, ICD-8: 173                                       |
| Malignant neoplasm of mesothelium and soft tissue  | Mesothelioma                                                                      | ICD-10: C45, ICD-9: 158/163, ICD-8: 158   163                             |
|                                                    | Kaposi sarcoma                                                                    | ICD-10: C46                                                               |
|                                                    | Malignant neoplasm of peripheral nerves and autonomic nervous system              | ICD-10: C47, ICD-8: 192[4-5]                                              |
|                                                    | Malignant neoplasm of retroperitoneum and peritoneum                              | ICD-10: C48                                                               |
|                                                    | Malignant neoplasm of other connective and soft tissue                            | ICD-10: C49, ICD-9: 171, ICD-8: 171                                       |
| Malignant neoplasm of breast                       | Malignant neoplasm of breast                                                      | ICD-10: C50, ICD-9: 174, ICD-8: 174                                       |
|                                                    | Malignant neoplasm of vulva                                                       | ICD-10: C51, ICD-8: 1841                                                  |
| Malignant neoplasm of female genital organs        | Malignant neoplasm of vagina                                                      | ICD-10: C52, ICD-8: 1840                                                  |
|                                                    | Malignant neoplasm of cervix uteri                                                | ICD-10: C53, ICD-9: 180, ICD-8: 180                                       |
|                                                    | Malignant neoplasm of corpus uteri                                                | ICD-10: C54, ICD-9: 182, ICD-8: 1820                                      |
|                                                    | Malignant neoplasm of uterus, part unspecified                                    | ICD-10: C55, ICD-8: 182, exclude ICD-8: 1820                              |
|                                                    | Malignant neoplasm of ovary                                                       | ICD-10: C56, ICD-9: 183, ICD-8: 1830                                      |
|                                                    | Malignant neoplasm of other and unspecified female genital organs                 | ICD-10: C57, ICD-9: 184, ICD-8: 183, exclude ICD-8: 1830                  |
| Malignant neoplasm of male genital organs          | Malignant neoplasm of penis                                                       | ICD-10: C60, ICD-8: 1870                                                  |
|                                                    | Malignant neoplasm of prostate                                                    | ICD-10: C61, ICD-9: 185, ICD-8: 185                                       |
|                                                    | Malignant neoplasm of testis                                                      | ICD-10: C62, ICD-9: 186, ICD-8: 186                                       |
|                                                    | Malignant neoplasm of other and unspecified male genital organs                   | ICD-10: C63, ICD-9: 187, ICD-8: 187, exclude ICD-9: 187[1-4], ICD-8: 1870 |
| Malignant neoplasm of urinary organs               | Malignant neoplasm of kidney, except renal pelvis                                 | ICD-10: C64, ICD-8: 1890                                                  |
|                                                    | Malignant neoplasm of renal pelvis                                                | ICD-10: C65, ICD-8: 1891                                                  |
|                                                    | Malignant neoplasm of ureter                                                      | ICD-10: C66, ICD-8: 1892                                                  |
|                                                    | Malignant neoplasm of bladder                                                     | ICD-10: C67, ICD-9: 188, ICD-8: 188                                       |

|                                                             |                                                                                             |                                                                                   |
|-------------------------------------------------------------|---------------------------------------------------------------------------------------------|-----------------------------------------------------------------------------------|
|                                                             | Malignant neoplasm of other and unspecified urinary organs                                  | ICD-10: C68, ICD-8: 1899                                                          |
| Malignant neoplasm of eye, brain and central nervous system | Malignant neoplasm of eye and adnexa                                                        | ICD-10: C69, ICD-9: 190, ICD-8: 190                                               |
|                                                             | Malignant neoplasm of meninges                                                              | ICD-10: C70, ICD-8: 192[1-2]                                                      |
|                                                             | Malignant neoplasm of brain                                                                 | ICD-10: C71, ICD-9: 191, ICD-8: 191                                               |
|                                                             | Malignant neoplasm of spinal cord, cranial nerves and other parts of central nervous system | ICD-10: C72, ICD-9: 192, ICD-8: 192                                               |
| Malignant neoplasm of endocrine gland                       | Malignant neoplasm of thyroid gland                                                         | ICD-10: C73, ICD-9: 193, ICD-8: 193                                               |
|                                                             | Malignant neoplasm of adrenal gland                                                         | ICD-10: C74, ICD-8: 1940                                                          |
|                                                             | Malignant neoplasm of other endocrine glands and related structures                         | ICD-10: C75, ICD-8: 194[1-9]                                                      |
| Secondary uncertain malignant neoplasm                      | Malignant neoplasm of other and ill-defined sites                                           | ICD-10: C76, ICD-9: 195, ICD-8: 195                                               |
|                                                             | Secondary and unspecified malignant neoplasm of lymph nodes                                 | ICD-10: C77, ICD-8: 196                                                           |
|                                                             | Secondary malignant neoplasm of respiratory and digestive organs                            | ICD-10: C78, ICD-8: 197                                                           |
|                                                             | Secondary malignant neoplasm of other and unspecified sites                                 | ICD-10: C79, ICD-8: 198                                                           |
|                                                             | Malignant neoplasm, without specification of site                                           | ICD-10: C80, ICD-9: 199, ICD-8: 199                                               |
| Primary lymphoid and hematopoietic malignant neoplasms      | Hodgkin lymphoma                                                                            | ICD-10: C81, ICD-9: 201                                                           |
|                                                             | Follicular lymphoma                                                                         | ICD-10: C82, ICD-9: 2000A                                                         |
|                                                             | Non-follicular lymphoma                                                                     | ICD-10: C83, ICD-9: 200, exclude ICD-9: 200A                                      |
|                                                             | Mature T/NK-cell lymphomas                                                                  | ICD-10: C84                                                                       |
|                                                             | Other and unspecified types of non-Hodgkin lymphoma                                         | ICD-10: C85                                                                       |
|                                                             | Malignant immunoproliferative diseases                                                      | ICD-10: C88                                                                       |
|                                                             | Multiple myeloma and malignant plasma cell neoplasms                                        | ICD-10: C90, ICD-9: 203, ICD-8: 203                                               |
|                                                             | Lymphoid leukaemia                                                                          | ICD-10: C91, ICD-9: 204, ICD-8: 204                                               |
|                                                             | Myeloid leukaemia                                                                           | ICD-10: C92, ICD-9: 205, ICD-8: 205                                               |
|                                                             | Monocytic leukaemia                                                                         | ICD-10: C93, ICD-9: 206, ICD-8: 206                                               |
|                                                             | Other leukaemias of specified cell type                                                     | ICD-10: C94, ICD-8: 207[0-2]                                                      |
|                                                             | Leukaemia of unspecified cell type                                                          | ICD-10: C95, ICD-9: 207/208, ICD-8: 207, exclude ICD-9: 207[0-8], ICD-8: 207[0-2] |
|                                                             | Other and unspecified malignant neoplasms of lymphoid, haematopoietic and related tissue    | ICD-10: C96, ICD-9: 202, ICD-8: 202                                               |
| Malignant neoplasms of independent                          | Malignant neoplasms of independent (primary) multiple sites                                 | ICD-10: C97                                                                       |



(primary) multiple  
sites

**Supplementary Table 3.** Associations of genetically predicted serum calcium and 25(OH)D with parent lifespans

| Exposure                     | SNPs | Method                                                                                    | Change in years | 95% CI       | <i>p</i> |
|------------------------------|------|-------------------------------------------------------------------------------------------|-----------------|--------------|----------|
| <b>Serum calcium</b>         |      |                                                                                           |                 |              |          |
| SNPs from GWAS meta-analysis | 7    | IVW-random effects                                                                        | -0.12           | -0.24, 0.00  | 0.050    |
|                              |      | Weighted median                                                                           | -0.08           | -0.22, 0.06  | 0.247    |
|                              |      | MR-Egger                                                                                  | -0.04           | -0.27, 0.18  | 0.697    |
|                              |      | Cochrane's Q = 5.63 ( <i>p</i> = 0.466); MR-Egger intercept = -0.003 ( <i>p</i> = 0.433)  |                 |              |          |
| SNPs from UKBB               | 140  | IVW-random effects                                                                        | -0.03           | -0.06, 0.01  | 0.100    |
|                              |      | Weighted median                                                                           | -0.07           | -0.11, -0.03 | <0.001   |
|                              |      | MR-Egger                                                                                  | -0.06           | -0.10, -0.01 | 0.030    |
|                              |      | Cochrane's Q = 248.11 ( <i>p</i> < 0.001); MR-Egger intercept = 0.001 ( <i>p</i> = 0.143) |                 |              |          |
| <b>Serum 25(OH)D</b>         |      |                                                                                           |                 |              |          |
| SNPs from GWAS meta-analysis | 7    | IVW-random effects                                                                        | 0.00            | -0.02, 0.03  | 0.810    |
|                              |      | Weighted median                                                                           | -0.01           | -0.03, 0.02  | 0.647    |
|                              |      | MR-Egger                                                                                  | -0.02           | -0.06, 0.02  | 0.398    |
|                              |      | Cochrane's Q = 5.73 ( <i>p</i> = 0.454); MR-Egger intercept = 0.004 ( <i>p</i> = 0.214)   |                 |              |          |
| SNPs from UKBB               | 115  | IVW-random effects                                                                        | 0.02            | -0.03, 0.07  | 0.403    |
|                              |      | Weighted median                                                                           | -0.01           | -0.05, 0.03  | 0.574    |
|                              |      | MR-Egger                                                                                  | 0.01            | -0.05, 0.07  | 0.820    |
|                              |      | Cochrane's Q = 405.06 ( <i>p</i> < 0.001); MR-Egger intercept = 0.001 ( <i>p</i> = 0.501) |                 |              |          |

CI, confidence interval; IVW, inverse-variance weighted; SNPs, single nucleotide polymorphisms.

**Supplementary Table 4.** Associations of genetically predicted serum calcium and 25(OH)D with longevity in sensitivity analyses

| Data source                  | SNPs | Heterogeneity testing |        | Weighted median estimates |       | MR-Egger regression |       | $P_{plei}$ |
|------------------------------|------|-----------------------|--------|---------------------------|-------|---------------------|-------|------------|
|                              |      | Cochrane's Q          | $P_Q$  | OR (95% CI)               | $P$   | OR (95% CI)         | $P$   |            |
| Serum calcium                |      |                       |        |                           |       |                     |       |            |
| SNPs from GWAS meta-analysis |      |                       |        |                           |       |                     |       |            |
| Deelen et al                 | 7    | 2.87                  | 0.825  | 0.77 (0.54, 1.10)         | 0.140 | 0.77 (0.45, 1.32)   | 0.345 | 0.982      |
| Pilling et al                | 6    | 5.05                  | 0.410  | 0.36(0.14, 0.93)          | 0.035 | 0.38(0.07, 2.15)    | 0.337 | 0.099      |
| SNPs from UKBB               |      |                       |        |                           |       |                     |       |            |
| Deelen et al                 | 175  | 220.27                | 0.010  | 0.76(0.58, 1.00)          | 0.045 | 0.99(0.68, 1.44)    | 0.957 | 0.750      |
| Pilling et al                | 175  | 219.42                | 0.011  | 0.63(0.48, 0.83)          | 0.001 | 0.88(0.62, 1.26)    | 0.487 | 0.411      |
| Serum 25(OH)D                |      |                       |        |                           |       |                     |       |            |
| SNPs from GWAS meta-analysis |      |                       |        |                           |       |                     |       |            |
| Deelen et al                 | 7    | 4.22                  | 0.647  | 0.94 (0.82, 1.08)         | 0.387 | 0.95 (0.77, 1.16)   | 0.601 | 0.848      |
| Pilling et al                | 6    | 17.52                 | 0.008  | 0.81(0.68, 0.97)          | 0.024 | 0.69(0.44, 1.06)    | 0.150 | 0.168      |
| SNPs from UKBB               |      |                       |        |                           |       |                     |       |            |
| Deelen et al                 | 115  | 226.65                | <0.001 | 0.92 (0.77, 1.11)         | 0.399 | 0.89 (0.71, 1.12)   | 0.331 | 0.086      |
| Pilling et al                | 105  | 247.08                | <0.001 | 0.76(0.6, 0.97)           | 0.029 | 0.8(0.6, 1.08)      | 0.143 | 0.033      |

25(OH)D indicates 25-hydroxyvitamin D; CI indicates confidence interval;  $P_{dist}$ ,  $p$  value for distortion test in MR-PRESSO;  $P_{plei}$ ,  $p$  value for pleiotropy (the intercept in MR-Egger regression);  $P_Q$ ,  $p$  value for Cochrane Q; SNPs, single-nucleotide polymorphisms; UKBB, UK Biobank.

Heterogeneity was observed in the analyses of serum calcium and 25(OH)D instrumented by UKBB data.  $P$  values for intercept in the MR-Egger statistic in the analysis of calcium were >0.05, which indicated balanced pleiotropy in these analyses. However, an imbalanced pleiotropy might occur in the analysis of 25(OH)D based on UKBB and data from Pilling et al ( $P_{plei}$  <0.05). There were consistent inverse associations of serum calcium with longevity in the weighted median model. MR-PRESSO detected outliers in the analysis of 25(OH)D based on GWAS meta-analysis in relation to longevity by Pilling LC et al (the outlier-corrected OR, 0.81; 95% CI, 0.72, 0.90;  $p=0.013$ ) and the analysis of 25(OH)D based on UKBB in relation to longevity by Deelen et al (OR, 0.98; 95% CI, 0.84, 1.14;  $p=0.807$ ) and Pilling et al. (OR, 0.93; 95% CI, 0.76, 1.14;  $p=0.498$ ).

**Supplementary Table 5.** Associations of genetically predicted serum calcium and 25(OH)D with cardiovascular disease and cancer in sensitivity analyses

| Data source                  | SNPs | Heterogeneity |       | Weighted median   |       | MR-Egger          |       | $P_{plei}$ |
|------------------------------|------|---------------|-------|-------------------|-------|-------------------|-------|------------|
|                              |      | Cochrane's Q  | $P_Q$ | OR (95% CI)       | $P$   | OR (95% CI)       | $P$   |            |
| Serum calcium                |      |               |       |                   |       |                   |       |            |
| SNPs from GWAS meta-analysis |      |               |       |                   |       |                   |       |            |
| Cardiovascular disease       | 7    | 2.37          | 0.882 | 1.07 (0.90, 1.23) | 0.382 | 1.02 (0.82, 1.28) | 0.868 | 0.414      |
| Cancer                       | 7    | 7.46          | 0.280 | 0.96 (0.81, 1.12) | 0.590 | 0.96 (0.74, 1.25) | 0.789 | 0.188      |
| SNPs from UKBB               |      |               |       |                   |       |                   |       |            |
| Cardiovascular disease       | 174  | 224.03        | 0.005 | 1.14 (1.02, 1.27) | 0.019 | 1.19 (1.02, 1.40) | 0.029 | 0.456      |
| Cancer                       | 174  | 184.39        | 0.263 | 1.08 (0.96, 1.22) | 0.204 | 1.00 (0.85, 1.18) | 0.965 | 0.993      |
| Serum 25(OH)D                |      |               |       |                   |       |                   |       |            |
| SNPs from GWAS meta-analysis |      |               |       |                   |       |                   |       |            |
| Cardiovascular disease       | 7    | 3.41          | 0.757 | 1.03 (0.97, 1.09) | 0.313 | 1.01 (0.93, 1.11) | 0.770 | 0.689      |
| Cancer                       | 7    | 2.83          | 0.830 | 0.97 (0.90, 1.05) | 0.511 | 1.00 (0.90, 1.10) | 0.983 | 0.825      |
| SNPs from UKBB               |      |               |       |                   |       |                   |       |            |
| Cardiovascular disease       | 120  | 165.16        | 0.003 | 1.03 (0.96, 1.11) | 0.431 | 1.01 (0.93, 1.09) | 0.880 | 0.296      |
| Cancer                       | 120  | 122.55        | 0.393 | 0.93 (0.85, 1.03) | 0.163 | 1.00 (0.93, 1.08) | 0.961 | 0.389      |

25(OH)D indicates 25-hydroxyvitamin D; CI, confidence interval;  $P_{dist}$ ,  $p$  value for distortion test in MR-PRESSO;  $P_{plei}$ ,  $p$  value for pleiotropy (the intercept in MR-Egger regression);  $P_Q$ ,  $p$  value for Cochrane Q; SNPs, single-nucleotide polymorphisms; UKBB, UK Biobank.

Heterogeneity was observed in the analysis of serum calcium instrumented by UKBB data and cardiovascular disease, and the analysis of serum 25(OH)D instrumented by UKBB data and cardiovascular disease.  $P$  values for intercept in MR-Egger in this analysis was  $>0.05$ , which indicated balanced pleiotropy. There were positive associations of serum calcium (UKBB) with cardiovascular disease in the weighted median and MR-Egger models. MR-PRESSO detected one outlier in the analysis of 25(OH)D based on UKBB in relation to cardiovascular disease (the outlier-corrected OR, 0.99; 95% CI, 0.93, 1.04;  $p=0.645$ ).

**Supplementary Table 6.** Data for analyses of the association of serum calcium with longevity, cardiovascular disease, and cancer

| Exposure              | Outcome            | SNP        | EA | NEA | Exposure_beta | Exposure_se | Outcome_beta | Outcome_se |
|-----------------------|--------------------|------------|----|-----|---------------|-------------|--------------|------------|
| Calcium_O'Seaghdha_CM | CA_FinnGen         | rs10491003 | T  | C   | 0.0540        | 0.0100      | -0.020       | 0.014      |
| Calcium_O'Seaghdha_CM | CA_FinnGen         | rs1550532  | C  | G   | 0.0360        | 0.0060      | -0.008       | 0.010      |
| Calcium_O'Seaghdha_CM | CA_FinnGen         | rs1570669  | G  | A   | 0.0360        | 0.0060      | -0.003       | 0.009      |
| Calcium_O'Seaghdha_CM | CA_FinnGen         | rs1801725  | T  | G   | 0.1420        | 0.0080      | -0.005       | 0.013      |
| Calcium_O'Seaghdha_CM | CA_FinnGen         | rs7336933  | G  | A   | 0.0440        | 0.0080      | 0.011        | 0.012      |
| Calcium_O'Seaghdha_CM | CA_FinnGen         | rs7481584  | G  | A   | 0.0360        | 0.0060      | -0.006       | 0.011      |
| Calcium_O'Seaghdha_CM | CA_FinnGen         | rs780094   | T  | C   | 0.0340        | 0.0060      | 0.005        | 0.009      |
| Calcium_O'Seaghdha_CM | CVD_FinnGen        | rs10491003 | T  | C   | 0.0540        | 0.0100      | 0.006        | 0.013      |
| Calcium_O'Seaghdha_CM | CVD_FinnGen        | rs1550532  | C  | G   | 0.0360        | 0.0060      | 0.007        | 0.008      |
| Calcium_O'Seaghdha_CM | CVD_FinnGen        | rs1570669  | G  | A   | 0.0360        | 0.0060      | 0.005        | 0.008      |
| Calcium_O'Seaghdha_CM | CVD_FinnGen        | rs1801725  | T  | G   | 0.1420        | 0.0080      | 0.009        | 0.012      |
| Calcium_O'Seaghdha_CM | CVD_FinnGen        | rs7336933  | G  | A   | 0.0440        | 0.0080      | 0.004        | 0.010      |
| Calcium_O'Seaghdha_CM | CVD_FinnGen        | rs7481584  | G  | A   | 0.0360        | 0.0060      | 0.016        | 0.009      |
| Calcium_O'Seaghdha_CM | CVD_FinnGen        | rs780094   | T  | C   | 0.0340        | 0.0060      | 0.002        | 0.008      |
| Calcium_O'Seaghdha_CM | Longevity_90%      | rs780094   | T  | C   | 0.0340        | 0.0060      | -0.028       | 0.020      |
| Calcium_O'Seaghdha_CM | Longevity_90%      | rs1550532  | C  | G   | 0.0360        | 0.0060      | -0.015       | 0.021      |
| Calcium_O'Seaghdha_CM | Longevity_90%      | rs1801725  | T  | G   | 0.1420        | 0.0080      | -0.037       | 0.027      |
| Calcium_O'Seaghdha_CM | Longevity_90%      | rs10491003 | T  | C   | 0.0540        | 0.0100      | -0.023       | 0.034      |
| Calcium_O'Seaghdha_CM | Longevity_90%      | rs7481584  | G  | A   | 0.0360        | 0.0060      | -0.009       | 0.022      |
| Calcium_O'Seaghdha_CM | Longevity_90%      | rs7336933  | G  | A   | 0.0440        | 0.0080      | -0.010       | 0.027      |
| Calcium_O'Seaghdha_CM | Longevity_90%      | rs1570669  | G  | A   | 0.0360        | 0.0060      | 0.018        | 0.020      |
| Calcium_O'Seaghdha_CM | Longevity_90%_UKBB | rs10491003 | T  | C   | 0.0270        | 0.0050      | -0.039       | 0.045      |
| Calcium_O'Seaghdha_CM | Longevity_90%_UKBB | rs1570669  | G  | A   | 0.0180        | 0.0030      | -0.025       | 0.028      |
| Calcium_O'Seaghdha_CM | Longevity_90%_UKBB | rs1801725  | T  | G   | 0.0710        | 0.0040      | -0.069       | 0.039      |
| Calcium_O'Seaghdha_CM | Longevity_90%_UKBB | rs7336933  | G  | A   | 0.0220        | 0.0040      | 0.055        | 0.036      |
| Calcium_O'Seaghdha_CM | Longevity_90%_UKBB | rs7481584  | G  | A   | 0.0180        | 0.0030      | -0.039       | 0.029      |
| Calcium_O'Seaghdha_CM | Longevity_90%_UKBB | rs780094   | T  | C   | 0.0170        | 0.0030      | -0.012       | 0.027      |
| Calcium_UKBB          | CA_FinnGen         | rs1036332  | C  | A   | 0.0166        | 0.0022      | 0.005        | 0.010      |
| Calcium_UKBB          | CA_FinnGen         | rs10513810 | G  | A   | -0.0204       | 0.0030      | -0.010       | 0.012      |
| Calcium_UKBB          | CA_FinnGen         | rs10754439 | T  | G   | 0.0113        | 0.0020      | -0.006       | 0.009      |
| Calcium_UKBB          | CA_FinnGen         | rs10819178 | G  | T   | 0.0251        | 0.0020      | -0.011       | 0.009      |

|              |            |             |   |   |         |        |        |       |
|--------------|------------|-------------|---|---|---------|--------|--------|-------|
| Calcium_UKBB | CA_FinnGen | rs10858935  | A | G | -0.0142 | 0.0021 | 0.007  | 0.009 |
| Calcium_UKBB | CA_FinnGen | rs10917386  | T | C | 0.0152  | 0.0021 | 0.019  | 0.010 |
| Calcium_UKBB | CA_FinnGen | rs10958700  | G | T | 0.0152  | 0.0023 | -0.019 | 0.012 |
| Calcium_UKBB | CA_FinnGen | rs11078597  | C | T | 0.0386  | 0.0025 | 0.012  | 0.011 |
| Calcium_UKBB | CA_FinnGen | rs11117777  | C | T | 0.0156  | 0.0027 | 0.014  | 0.012 |
| Calcium_UKBB | CA_FinnGen | rs112174050 | T | C | 0.0804  | 0.0062 | 0.030  | 0.019 |
| Calcium_UKBB | CA_FinnGen | rs113955164 | A | G | 0.0158  | 0.0024 | -0.017 | 0.011 |
| Calcium_UKBB | CA_FinnGen | rs115227958 | T | C | -0.0571 | 0.0053 | -0.007 | 0.032 |
| Calcium_UKBB | CA_FinnGen | rs11588907  | T | C | -0.0121 | 0.0020 | -0.010 | 0.009 |
| Calcium_UKBB | CA_FinnGen | rs115946508 | A | C | 0.0258  | 0.0031 | 0.006  | 0.017 |
| Calcium_UKBB | CA_FinnGen | rs11621792  | T | C | 0.0121  | 0.0020 | -0.005 | 0.009 |
| Calcium_UKBB | CA_FinnGen | rs11629876  | T | C | -0.0137 | 0.0021 | 0.002  | 0.010 |
| Calcium_UKBB | CA_FinnGen | rs11671393  | C | G | -0.0345 | 0.0051 | 0.043  | 0.021 |
| Calcium_UKBB | CA_FinnGen | rs116769926 | A | C | 0.0547  | 0.0064 | -0.007 | 0.048 |
| Calcium_UKBB | CA_FinnGen | rs117080167 | T | C | -0.0249 | 0.0035 | -0.005 | 0.013 |
| Calcium_UKBB | CA_FinnGen | rs117080418 | A | T | -0.0740 | 0.0099 | 0.054  | 0.168 |
| Calcium_UKBB | CA_FinnGen | rs117179023 | T | C | -0.0536 | 0.0091 | 0.033  | 0.028 |
| Calcium_UKBB | CA_FinnGen | rs117213754 | A | G | 0.0818  | 0.0080 | -0.049 | 0.061 |
| Calcium_UKBB | CA_FinnGen | rs11730491  | T | G | 0.0161  | 0.0026 | -0.031 | 0.013 |
| Calcium_UKBB | CA_FinnGen | rs117896857 | T | C | -0.0410 | 0.0059 | 0.024  | 0.047 |
| Calcium_UKBB | CA_FinnGen | rs11792928  | T | C | -0.0126 | 0.0021 | 0.015  | 0.009 |
| Calcium_UKBB | CA_FinnGen | rs12132412  | G | A | 0.0211  | 0.0020 | 0.016  | 0.009 |
| Calcium_UKBB | CA_FinnGen | rs12135382  | T | C | 0.0174  | 0.0020 | 0.004  | 0.009 |
| Calcium_UKBB | CA_FinnGen | rs12147703  | A | G | -0.0218 | 0.0032 | -0.027 | 0.013 |
| Calcium_UKBB | CA_FinnGen | rs12339541  | A | C | -0.0463 | 0.0040 | 0.011  | 0.018 |
| Calcium_UKBB | CA_FinnGen | rs12378991  | A | G | -0.0284 | 0.0036 | -0.012 | 0.019 |
| Calcium_UKBB | CA_FinnGen | rs12519940  | T | C | -0.0201 | 0.0022 | -0.002 | 0.010 |
| Calcium_UKBB | CA_FinnGen | rs12583851  | C | T | -0.0180 | 0.0022 | -0.010 | 0.009 |
| Calcium_UKBB | CA_FinnGen | rs1260326   | C | T | -0.0371 | 0.0020 | -0.003 | 0.009 |
| Calcium_UKBB | CA_FinnGen | rs12613807  | C | T | 0.0121  | 0.0020 | -0.007 | 0.009 |
| Calcium_UKBB | CA_FinnGen | rs12675477  | T | C | 0.0139  | 0.0022 | -0.013 | 0.012 |
| Calcium_UKBB | CA_FinnGen | rs12793731  | T | C | 0.0114  | 0.0020 | 0.002  | 0.009 |
| Calcium_UKBB | CA_FinnGen | rs12918968  | C | A | -0.0237 | 0.0020 | 0.006  | 0.009 |
| Calcium_UKBB | CA_FinnGen | rs12922549  | T | C | -0.0171 | 0.0023 | -0.013 | 0.010 |

|              |            |             |   |   |         |        |        |       |
|--------------|------------|-------------|---|---|---------|--------|--------|-------|
| Calcium_UKBB | CA_FinnGen | rs12982234  | T | C | -0.0452 | 0.0050 | 0.055  | 0.029 |
| Calcium_UKBB | CA_FinnGen | rs12998379  | A | G | -0.0180 | 0.0025 | 0.007  | 0.012 |
| Calcium_UKBB | CA_FinnGen | rs13073106  | T | C | 0.0285  | 0.0020 | 0.017  | 0.009 |
| Calcium_UKBB | CA_FinnGen | rs13107325  | T | C | -0.0484 | 0.0037 | 0.015  | 0.037 |
| Calcium_UKBB | CA_FinnGen | rs13108218  | G | A | -0.0299 | 0.0020 | -0.002 | 0.010 |
| Calcium_UKBB | CA_FinnGen | rs13259549  | C | T | 0.0116  | 0.0020 | -0.026 | 0.009 |
| Calcium_UKBB | CA_FinnGen | rs13389219  | T | C | -0.0129 | 0.0020 | -0.016 | 0.009 |
| Calcium_UKBB | CA_FinnGen | rs1354034   | C | T | -0.0142 | 0.0020 | -0.007 | 0.010 |
| Calcium_UKBB | CA_FinnGen | rs1374161   | A | G | -0.0170 | 0.0019 | -0.010 | 0.009 |
| Calcium_UKBB | CA_FinnGen | rs138789759 | A | G | 0.0361  | 0.0037 | -0.026 | 0.017 |
| Calcium_UKBB | CA_FinnGen | rs147233090 | T | C | 0.0790  | 0.0063 | 0.036  | 0.061 |
| Calcium_UKBB | CA_FinnGen | rs1476698   | G | A | -0.0157 | 0.0020 | -0.010 | 0.009 |
| Calcium_UKBB | CA_FinnGen | rs148148022 | A | G | -0.0539 | 0.0085 | 0.003  | 0.045 |
| Calcium_UKBB | CA_FinnGen | rs1497826   | G | C | 0.0186  | 0.0020 | -0.011 | 0.009 |
| Calcium_UKBB | CA_FinnGen | rs149807892 | T | C | 0.0492  | 0.0079 | 0.006  | 0.064 |
| Calcium_UKBB | CA_FinnGen | rs150268548 | A | G | 0.0277  | 0.0038 | -0.001 | 0.018 |
| Calcium_UKBB | CA_FinnGen | rs1544432   | G | T | 0.0131  | 0.0022 | 0.011  | 0.010 |
| Calcium_UKBB | CA_FinnGen | rs164751    | T | G | -0.0146 | 0.0020 | -0.022 | 0.009 |
| Calcium_UKBB | CA_FinnGen | rs165316    | G | A | -0.0139 | 0.0024 | -0.011 | 0.011 |
| Calcium_UKBB | CA_FinnGen | rs1672991   | G | A | 0.0571  | 0.0039 | 0.011  | 0.018 |
| Calcium_UKBB | CA_FinnGen | rs17132144  | T | C | -0.0189 | 0.0033 | 0.013  | 0.013 |
| Calcium_UKBB | CA_FinnGen | rs17164683  | T | C | -0.0164 | 0.0022 | 0.010  | 0.010 |
| Calcium_UKBB | CA_FinnGen | rs17200894  | G | C | 0.1044  | 0.0028 | -0.022 | 0.016 |
| Calcium_UKBB | CA_FinnGen | rs17580     | A | T | 0.0357  | 0.0045 | -0.009 | 0.047 |
| Calcium_UKBB | CA_FinnGen | rs1763519   | C | G | -0.0246 | 0.0020 | 0.005  | 0.009 |
| Calcium_UKBB | CA_FinnGen | rs17774672  | A | G | -0.0210 | 0.0027 | -0.006 | 0.010 |
| Calcium_UKBB | CA_FinnGen | rs17884869  | A | G | -0.0849 | 0.0062 | -0.014 | 0.024 |
| Calcium_UKBB | CA_FinnGen | rs1801282   | G | C | -0.0281 | 0.0030 | 0.003  | 0.012 |
| Calcium_UKBB | CA_FinnGen | rs1858800   | T | C | 0.0233  | 0.0021 | -0.014 | 0.011 |
| Calcium_UKBB | CA_FinnGen | rs2001884   | A | T | -0.0130 | 0.0019 | 0.003  | 0.009 |
| Calcium_UKBB | CA_FinnGen | rs2004315   | T | C | 0.0253  | 0.0020 | -0.005 | 0.009 |
| Calcium_UKBB | CA_FinnGen | rs2249825   | C | G | -0.0122 | 0.0022 | -0.007 | 0.009 |
| Calcium_UKBB | CA_FinnGen | rs2274224   | C | G | -0.0133 | 0.0020 | -0.014 | 0.009 |
| Calcium_UKBB | CA_FinnGen | rs2309233   | C | T | 0.0161  | 0.0022 | 0.000  | 0.010 |

|              |            |            |   |   |         |        |        |       |
|--------------|------------|------------|---|---|---------|--------|--------|-------|
| Calcium_UKBB | CA_FinnGen | rs2327774  | C | T | -0.0165 | 0.0020 | -0.008 | 0.009 |
| Calcium_UKBB | CA_FinnGen | rs2335534  | A | G | -0.0298 | 0.0025 | 0.026  | 0.012 |
| Calcium_UKBB | CA_FinnGen | rs2343592  | G | A | -0.0178 | 0.0022 | -0.012 | 0.011 |
| Calcium_UKBB | CA_FinnGen | rs2370218  | T | G | -0.0163 | 0.0023 | 0.005  | 0.010 |
| Calcium_UKBB | CA_FinnGen | rs2395158  | G | A | -0.0179 | 0.0026 | -0.010 | 0.014 |
| Calcium_UKBB | CA_FinnGen | rs2419886  | T | C | -0.0151 | 0.0022 | -0.006 | 0.010 |
| Calcium_UKBB | CA_FinnGen | rs2647242  | G | A | -0.0154 | 0.0024 | -0.012 | 0.012 |
| Calcium_UKBB | CA_FinnGen | rs2762938  | A | G | 0.0119  | 0.0020 | -0.016 | 0.009 |
| Calcium_UKBB | CA_FinnGen | rs28520334 | T | G | 0.0165  | 0.0030 | 0.012  | 0.014 |
| Calcium_UKBB | CA_FinnGen | rs28929474 | T | C | 0.0953  | 0.0069 | -0.005 | 0.032 |
| Calcium_UKBB | CA_FinnGen | rs2930191  | A | G | -0.0158 | 0.0020 | -0.003 | 0.009 |
| Calcium_UKBB | CA_FinnGen | rs2971855  | A | G | 0.0142  | 0.0021 | -0.018 | 0.009 |
| Calcium_UKBB | CA_FinnGen | rs3011642  | T | C | 0.0148  | 0.0023 | -0.002 | 0.012 |
| Calcium_UKBB | CA_FinnGen | rs3026445  | C | T | -0.0133 | 0.0020 | 0.001  | 0.009 |
| Calcium_UKBB | CA_FinnGen | rs302650   | A | G | -0.0143 | 0.0020 | 0.009  | 0.009 |
| Calcium_UKBB | CA_FinnGen | rs3091842  | A | G | 0.0733  | 0.0049 | 0.015  | 0.016 |
| Calcium_UKBB | CA_FinnGen | rs3133548  | T | C | 0.0159  | 0.0028 | -0.021 | 0.013 |
| Calcium_UKBB | CA_FinnGen | rs34290411 | G | C | 0.0134  | 0.0021 | -0.006 | 0.011 |
| Calcium_UKBB | CA_FinnGen | rs35118755 | T | C | 0.0177  | 0.0027 | 0.002  | 0.016 |
| Calcium_UKBB | CA_FinnGen | rs35320690 | C | T | 0.0195  | 0.0022 | -0.004 | 0.010 |
| Calcium_UKBB | CA_FinnGen | rs35590487 | T | C | -0.0165 | 0.0023 | 0.000  | 0.010 |
| Calcium_UKBB | CA_FinnGen | rs35751693 | T | C | 0.0326  | 0.0052 | 0.026  | 0.030 |
| Calcium_UKBB | CA_FinnGen | rs35852840 | A | C | 0.0240  | 0.0041 | -0.015 | 0.022 |
| Calcium_UKBB | CA_FinnGen | rs36032443 | C | A | -0.0190 | 0.0020 | -0.006 | 0.009 |
| Calcium_UKBB | CA_FinnGen | rs36086195 | T | C | 0.0154  | 0.0020 | 0.007  | 0.010 |
| Calcium_UKBB | CA_FinnGen | rs36104352 | C | A | 0.0222  | 0.0030 | 0.002  | 0.018 |
| Calcium_UKBB | CA_FinnGen | rs3748861  | A | C | -0.0134 | 0.0024 | 0.006  | 0.011 |
| Calcium_UKBB | CA_FinnGen | rs3794695  | T | C | 0.0158  | 0.0025 | -0.005 | 0.011 |
| Calcium_UKBB | CA_FinnGen | rs3795243  | C | G | 0.0170  | 0.0029 | 0.010  | 0.019 |
| Calcium_UKBB | CA_FinnGen | rs3822858  | C | T | -0.0126 | 0.0020 | -0.008 | 0.010 |
| Calcium_UKBB | CA_FinnGen | rs3931841  | G | A | -0.0196 | 0.0021 | -0.003 | 0.009 |
| Calcium_UKBB | CA_FinnGen | rs4082330  | T | C | 0.0154  | 0.0025 | 0.008  | 0.014 |
| Calcium_UKBB | CA_FinnGen | rs41278174 | A | G | 0.0390  | 0.0059 | 0.007  | 0.025 |
| Calcium_UKBB | CA_FinnGen | rs4239142  | G | A | -0.0132 | 0.0022 | -0.008 | 0.010 |



|              |            |            |    |   |         |        |        |       |
|--------------|------------|------------|----|---|---------|--------|--------|-------|
| Calcium_UKBB | CA_FinnGen | rs4320103  | G  | A | 0.0345  | 0.0051 | 0.021  | 0.022 |
| Calcium_UKBB | CA_FinnGen | rs4324076  | C  | A | -0.0140 | 0.0019 | 0.005  | 0.009 |
| Calcium_UKBB | CA_FinnGen | rs4633480  | A  | G | 0.0151  | 0.0020 | 0.007  | 0.009 |
| Calcium_UKBB | CA_FinnGen | rs4653767  | C  | T | -0.0150 | 0.0023 | -0.007 | 0.010 |
| Calcium_UKBB | CA_FinnGen | rs4721467  | T  | A | -0.0174 | 0.0022 | -0.006 | 0.011 |
| Calcium_UKBB | CA_FinnGen | rs4744854  | C  | G | -0.0243 | 0.0020 | -0.005 | 0.009 |
| Calcium_UKBB | CA_FinnGen | rs4758621  | G  | A | -0.0204 | 0.0021 | 0.006  | 0.010 |
| Calcium_UKBB | CA_FinnGen | rs4790310  | T  | C | -0.0148 | 0.0020 | -0.013 | 0.009 |
| Calcium_UKBB | CA_FinnGen | rs4841132  | G  | A | 0.0425  | 0.0034 | 0.030  | 0.013 |
| Calcium_UKBB | CA_FinnGen | rs4935009  | C  | A | -0.0172 | 0.0029 | -0.004 | 0.013 |
| Calcium_UKBB | CA_FinnGen | rs4938642  | C  | G | 0.0254  | 0.0037 | 0.030  | 0.027 |
| Calcium_UKBB | CA_FinnGen | rs498490   | T  | C | -0.0232 | 0.0026 | -0.007 | 0.011 |
| Calcium_UKBB | CA_FinnGen | rs55772024 | A  | G | -0.0133 | 0.0023 | -0.006 | 0.009 |
| Calcium_UKBB | CA_FinnGen | rs56406311 | T  | C | 0.0134  | 0.0020 | -0.006 | 0.010 |
| Calcium_UKBB | CA_FinnGen | rs5751350  | A  | G | 0.0127  | 0.0021 | -0.015 | 0.009 |
| Calcium_UKBB | CA_FinnGen | rs5760495  | T  | C | 0.0123  | 0.0020 | -0.004 | 0.009 |
| Calcium_UKBB | CA_FinnGen | rs5786388  | CA | C | 0.0170  | 0.0020 | -0.005 | 0.009 |
| Calcium_UKBB | CA_FinnGen | rs59821684 | G  | A | 0.0416  | 0.0058 | -0.024 | 0.045 |
| Calcium_UKBB | CA_FinnGen | rs6127099  | T  | A | -0.0407 | 0.0022 | -0.003 | 0.010 |
| Calcium_UKBB | CA_FinnGen | rs62134679 | C  | T | 0.0164  | 0.0027 | -0.004 | 0.014 |
| Calcium_UKBB | CA_FinnGen | rs62211622 | A  | C | -0.0141 | 0.0025 | 0.025  | 0.014 |
| Calcium_UKBB | CA_FinnGen | rs62309863 | T  | G | -0.0114 | 0.0020 | 0.008  | 0.009 |
| Calcium_UKBB | CA_FinnGen | rs62472728 | T  | C | 0.0237  | 0.0041 | -0.029 | 0.015 |
| Calcium_UKBB | CA_FinnGen | rs634916   | T  | A | -0.0106 | 0.0019 | -0.018 | 0.009 |
| Calcium_UKBB | CA_FinnGen | rs6580981  | A  | G | -0.0137 | 0.0020 | -0.004 | 0.009 |
| Calcium_UKBB | CA_FinnGen | rs66920316 | A  | G | -0.0153 | 0.0024 | 0.016  | 0.014 |
| Calcium_UKBB | CA_FinnGen | rs6698689  | A  | G | -0.0229 | 0.0030 | -0.001 | 0.015 |
| Calcium_UKBB | CA_FinnGen | rs6741561  | T  | C | -0.0291 | 0.0020 | -0.001 | 0.009 |
| Calcium_UKBB | CA_FinnGen | rs6841429  | A  | C | -0.0300 | 0.0026 | -0.005 | 0.013 |
| Calcium_UKBB | CA_FinnGen | rs7003580  | T  | C | 0.0123  | 0.0020 | -0.004 | 0.009 |
| Calcium_UKBB | CA_FinnGen | rs710217   | G  | A | 0.0183  | 0.0019 | 0.001  | 0.009 |
| Calcium_UKBB | CA_FinnGen | rs71565393 | T  | C | 0.0140  | 0.0026 | -0.009 | 0.013 |
| Calcium_UKBB | CA_FinnGen | rs71658797 | A  | T | 0.0164  | 0.0030 | 0.008  | 0.013 |
| Calcium_UKBB | CA_FinnGen | rs7221118  | C  | T | -0.0151 | 0.0024 | -0.004 | 0.010 |

|              |            |            |   |   |         |        |        |       |
|--------------|------------|------------|---|---|---------|--------|--------|-------|
| Calcium_UKBB | CA_FinnGen | rs72697816 | T | C | 0.0149  | 0.0026 | -0.012 | 0.011 |
| Calcium_UKBB | CA_FinnGen | rs7370877  | G | A | -0.0132 | 0.0020 | 0.005  | 0.009 |
| Calcium_UKBB | CA_FinnGen | rs7402977  | A | G | -0.0125 | 0.0022 | -0.001 | 0.010 |
| Calcium_UKBB | CA_FinnGen | rs74230087 | A | G | -0.0422 | 0.0036 | -0.003 | 0.017 |
| Calcium_UKBB | CA_FinnGen | rs75448233 | T | C | 0.0253  | 0.0043 | 0.016  | 0.024 |
| Calcium_UKBB | CA_FinnGen | rs7546838  | G | A | 0.0152  | 0.0021 | 0.029  | 0.009 |
| Calcium_UKBB | CA_FinnGen | rs7559013  | C | A | 0.0182  | 0.0029 | 0.004  | 0.015 |
| Calcium_UKBB | CA_FinnGen | rs75702986 | A | G | 0.0277  | 0.0025 | 0.001  | 0.011 |
| Calcium_UKBB | CA_FinnGen | rs7587636  | A | G | -0.0127 | 0.0020 | 0.000  | 0.009 |
| Calcium_UKBB | CA_FinnGen | rs75895430 | G | C | 0.0619  | 0.0056 | -0.048 | 0.037 |
| Calcium_UKBB | CA_FinnGen | rs7592216  | T | G | -0.0158 | 0.0029 | 0.032  | 0.016 |
| Calcium_UKBB | CA_FinnGen | rs7599     | G | A | -0.0146 | 0.0020 | -0.006 | 0.010 |
| Calcium_UKBB | CA_FinnGen | rs76947531 | C | T | -0.0689 | 0.0031 | 0.011  | 0.018 |
| Calcium_UKBB | CA_FinnGen | rs7730344  | A | C | 0.0139  | 0.0021 | 0.008  | 0.009 |
| Calcium_UKBB | CA_FinnGen | rs775249   | T | C | -0.0122 | 0.0022 | 0.009  | 0.010 |
| Calcium_UKBB | CA_FinnGen | rs77542162 | G | A | -0.0668 | 0.0065 | 0.051  | 0.054 |
| Calcium_UKBB | CA_FinnGen | rs777588   | A | G | -0.0223 | 0.0020 | 0.016  | 0.009 |
| Calcium_UKBB | CA_FinnGen | rs778368   | C | G | -0.0112 | 0.0020 | -0.011 | 0.010 |
| Calcium_UKBB | CA_FinnGen | rs7786368  | C | T | -0.0187 | 0.0020 | -0.007 | 0.009 |
| Calcium_UKBB | CA_FinnGen | rs79501693 | C | T | -0.0377 | 0.0068 | 0.057  | 0.041 |
| Calcium_UKBB | CA_FinnGen | rs8054061  | C | T | 0.0146  | 0.0019 | -0.003 | 0.009 |
| Calcium_UKBB | CA_FinnGen | rs838717   | A | G | -0.0354 | 0.0020 | 0.002  | 0.009 |
| Calcium_UKBB | CA_FinnGen | rs883951   | G | A | 0.0178  | 0.0022 | 0.004  | 0.010 |
| Calcium_UKBB | CA_FinnGen | rs928760   | T | C | -0.0142 | 0.0021 | -0.005 | 0.010 |
| Calcium_UKBB | CA_FinnGen | rs9379881  | C | T | -0.0116 | 0.0019 | -0.001 | 0.009 |
| Calcium_UKBB | CA_FinnGen | rs9388399  | C | T | -0.0188 | 0.0021 | 0.007  | 0.009 |
| Calcium_UKBB | CA_FinnGen | rs9399697  | T | C | 0.0110  | 0.0019 | 0.004  | 0.009 |
| Calcium_UKBB | CA_FinnGen | rs9419741  | G | A | 0.0118  | 0.0019 | -0.009 | 0.009 |
| Calcium_UKBB | CA_FinnGen | rs9447004  | G | A | -0.0323 | 0.0019 | 0.002  | 0.009 |
| Calcium_UKBB | CA_FinnGen | rs945890   | T | A | -0.0130 | 0.0022 | 0.021  | 0.010 |
| Calcium_UKBB | CA_FinnGen | rs948737   | T | C | -0.0116 | 0.0020 | -0.004 | 0.009 |
| Calcium_UKBB | CA_FinnGen | rs949300   | A | T | 0.0118  | 0.0020 | -0.011 | 0.009 |
| Calcium_UKBB | CA_FinnGen | rs9530     | G | A | -0.0241 | 0.0019 | 0.002  | 0.009 |
| Calcium_UKBB | CA_FinnGen | rs9532958  | A | G | 0.0264  | 0.0027 | 0.006  | 0.012 |

|              |             |             |   |   |         |        |        |       |
|--------------|-------------|-------------|---|---|---------|--------|--------|-------|
| Calcium_UKBB | CVD_FinnGen | rs1036332   | C | A | 0.0166  | 0.0022 | -0.015 | 0.009 |
| Calcium_UKBB | CVD_FinnGen | rs10513810  | G | A | -0.0204 | 0.0030 | 0.002  | 0.011 |
| Calcium_UKBB | CVD_FinnGen | rs10754439  | T | G | 0.0113  | 0.0020 | 0.001  | 0.008 |
| Calcium_UKBB | CVD_FinnGen | rs10819178  | G | T | 0.0251  | 0.0020 | -0.001 | 0.008 |
| Calcium_UKBB | CVD_FinnGen | rs10858935  | A | G | -0.0142 | 0.0021 | 0.010  | 0.008 |
| Calcium_UKBB | CVD_FinnGen | rs10917386  | T | C | 0.0152  | 0.0021 | 0.000  | 0.009 |
| Calcium_UKBB | CVD_FinnGen | rs10958700  | G | T | 0.0152  | 0.0023 | 0.011  | 0.010 |
| Calcium_UKBB | CVD_FinnGen | rs11078597  | C | T | 0.0386  | 0.0025 | -0.002 | 0.010 |
| Calcium_UKBB | CVD_FinnGen | rs11117777  | C | T | 0.0156  | 0.0027 | -0.010 | 0.010 |
| Calcium_UKBB | CVD_FinnGen | rs112174050 | T | C | 0.0804  | 0.0062 | 0.003  | 0.016 |
| Calcium_UKBB | CVD_FinnGen | rs113955164 | A | G | 0.0158  | 0.0024 | 0.020  | 0.009 |
| Calcium_UKBB | CVD_FinnGen | rs115227958 | T | C | -0.0571 | 0.0053 | -0.019 | 0.028 |
| Calcium_UKBB | CVD_FinnGen | rs11588907  | T | C | -0.0121 | 0.0020 | -0.001 | 0.008 |
| Calcium_UKBB | CVD_FinnGen | rs115946508 | A | C | 0.0258  | 0.0031 | 0.001  | 0.014 |
| Calcium_UKBB | CVD_FinnGen | rs11621792  | T | C | 0.0121  | 0.0020 | -0.013 | 0.008 |
| Calcium_UKBB | CVD_FinnGen | rs11629876  | T | C | -0.0137 | 0.0021 | -0.025 | 0.008 |
| Calcium_UKBB | CVD_FinnGen | rs11671393  | C | G | -0.0345 | 0.0051 | -0.037 | 0.018 |
| Calcium_UKBB | CVD_FinnGen | rs116769926 | A | C | 0.0547  | 0.0064 | -0.069 | 0.043 |
| Calcium_UKBB | CVD_FinnGen | rs117080167 | T | C | -0.0249 | 0.0035 | -0.018 | 0.011 |
| Calcium_UKBB | CVD_FinnGen | rs117080418 | A | T | -0.0740 | 0.0099 | -0.038 | 0.149 |
| Calcium_UKBB | CVD_FinnGen | rs117179023 | T | C | -0.0536 | 0.0091 | 0.018  | 0.025 |
| Calcium_UKBB | CVD_FinnGen | rs117213754 | A | G | 0.0818  | 0.0080 | 0.015  | 0.055 |
| Calcium_UKBB | CVD_FinnGen | rs11730491  | T | G | 0.0161  | 0.0026 | 0.009  | 0.011 |
| Calcium_UKBB | CVD_FinnGen | rs117896857 | T | C | -0.0410 | 0.0059 | 0.039  | 0.041 |
| Calcium_UKBB | CVD_FinnGen | rs11792928  | T | C | -0.0126 | 0.0021 | 0.006  | 0.008 |
| Calcium_UKBB | CVD_FinnGen | rs12132412  | G | A | 0.0211  | 0.0020 | 0.011  | 0.008 |
| Calcium_UKBB | CVD_FinnGen | rs12135382  | T | C | 0.0174  | 0.0020 | -0.012 | 0.008 |
| Calcium_UKBB | CVD_FinnGen | rs12147703  | A | G | -0.0218 | 0.0032 | -0.017 | 0.011 |
| Calcium_UKBB | CVD_FinnGen | rs12339541  | A | C | -0.0463 | 0.0040 | -0.024 | 0.016 |
| Calcium_UKBB | CVD_FinnGen | rs12378991  | A | G | -0.0284 | 0.0036 | 0.014  | 0.016 |
| Calcium_UKBB | CVD_FinnGen | rs12519940  | T | C | -0.0201 | 0.0022 | -0.002 | 0.009 |
| Calcium_UKBB | CVD_FinnGen | rs12583851  | C | T | -0.0180 | 0.0022 | 0.004  | 0.008 |
| Calcium_UKBB | CVD_FinnGen | rs1260326   | C | T | -0.0371 | 0.0020 | -0.006 | 0.008 |
| Calcium_UKBB | CVD_FinnGen | rs12613807  | C | T | 0.0121  | 0.0020 | 0.000  | 0.008 |

|              |             |             |   |   |         |        |        |       |
|--------------|-------------|-------------|---|---|---------|--------|--------|-------|
| Calcium_UKBB | CVD_FinnGen | rs12675477  | T | C | 0.0139  | 0.0022 | 0.008  | 0.010 |
| Calcium_UKBB | CVD_FinnGen | rs12793731  | T | C | 0.0114  | 0.0020 | 0.008  | 0.008 |
| Calcium_UKBB | CVD_FinnGen | rs12918968  | C | A | -0.0237 | 0.0020 | -0.023 | 0.008 |
| Calcium_UKBB | CVD_FinnGen | rs12922549  | T | C | -0.0171 | 0.0023 | 0.003  | 0.009 |
| Calcium_UKBB | CVD_FinnGen | rs12982234  | T | C | -0.0452 | 0.0050 | -0.003 | 0.025 |
| Calcium_UKBB | CVD_FinnGen | rs12998379  | A | G | -0.0180 | 0.0025 | -0.013 | 0.010 |
| Calcium_UKBB | CVD_FinnGen | rs13073106  | T | C | 0.0285  | 0.0020 | 0.011  | 0.008 |
| Calcium_UKBB | CVD_FinnGen | rs13107325  | T | C | -0.0484 | 0.0037 | 0.008  | 0.033 |
| Calcium_UKBB | CVD_FinnGen | rs13108218  | G | A | -0.0299 | 0.0020 | -0.016 | 0.008 |
| Calcium_UKBB | CVD_FinnGen | rs13259549  | C | T | 0.0116  | 0.0020 | -0.016 | 0.008 |
| Calcium_UKBB | CVD_FinnGen | rs13389219  | T | C | -0.0129 | 0.0020 | -0.020 | 0.008 |
| Calcium_UKBB | CVD_FinnGen | rs1354034   | C | T | -0.0142 | 0.0020 | -0.005 | 0.009 |
| Calcium_UKBB | CVD_FinnGen | rs1374161   | A | G | -0.0170 | 0.0019 | 0.003  | 0.008 |
| Calcium_UKBB | CVD_FinnGen | rs138789759 | A | G | 0.0361  | 0.0037 | -0.001 | 0.014 |
| Calcium_UKBB | CVD_FinnGen | rs147233090 | T | C | 0.0790  | 0.0063 | 0.036  | 0.054 |
| Calcium_UKBB | CVD_FinnGen | rs1476698   | G | A | -0.0157 | 0.0020 | 0.001  | 0.008 |
| Calcium_UKBB | CVD_FinnGen | rs148148022 | A | G | -0.0539 | 0.0085 | -0.073 | 0.038 |
| Calcium_UKBB | CVD_FinnGen | rs1497826   | G | C | 0.0186  | 0.0020 | 0.000  | 0.008 |
| Calcium_UKBB | CVD_FinnGen | rs149807892 | T | C | 0.0492  | 0.0079 | 0.005  | 0.056 |
| Calcium_UKBB | CVD_FinnGen | rs150268548 | A | G | 0.0277  | 0.0038 | -0.007 | 0.016 |
| Calcium_UKBB | CVD_FinnGen | rs1544432   | G | T | 0.0131  | 0.0022 | -0.016 | 0.009 |
| Calcium_UKBB | CVD_FinnGen | rs164751    | T | G | -0.0146 | 0.0020 | -0.011 | 0.008 |
| Calcium_UKBB | CVD_FinnGen | rs165316    | G | A | -0.0139 | 0.0024 | -0.028 | 0.009 |
| Calcium_UKBB | CVD_FinnGen | rs1672991   | G | A | 0.0571  | 0.0039 | 0.001  | 0.016 |
| Calcium_UKBB | CVD_FinnGen | rs17132144  | T | C | -0.0189 | 0.0033 | 0.010  | 0.012 |
| Calcium_UKBB | CVD_FinnGen | rs17164683  | T | C | -0.0164 | 0.0022 | -0.003 | 0.009 |
| Calcium_UKBB | CVD_FinnGen | rs17200894  | G | C | 0.1044  | 0.0028 | 0.015  | 0.014 |
| Calcium_UKBB | CVD_FinnGen | rs17580     | A | T | 0.0357  | 0.0045 | -0.014 | 0.041 |
| Calcium_UKBB | CVD_FinnGen | rs1763519   | C | G | -0.0246 | 0.0020 | 0.004  | 0.008 |
| Calcium_UKBB | CVD_FinnGen | rs17774672  | A | G | -0.0210 | 0.0027 | -0.011 | 0.009 |
| Calcium_UKBB | CVD_FinnGen | rs17884869  | A | G | -0.0849 | 0.0062 | 0.020  | 0.021 |
| Calcium_UKBB | CVD_FinnGen | rs1801282   | G | C | -0.0281 | 0.0030 | -0.015 | 0.010 |
| Calcium_UKBB | CVD_FinnGen | rs1858800   | T | C | 0.0233  | 0.0021 | 0.004  | 0.009 |
| Calcium_UKBB | CVD_FinnGen | rs2001884   | A | T | -0.0130 | 0.0019 | -0.007 | 0.008 |

|              |             |            |   |   |         |        |        |       |
|--------------|-------------|------------|---|---|---------|--------|--------|-------|
| Calcium_UKBB | CVD_FinnGen | rs2004315  | T | C | 0.0253  | 0.0020 | 0.010  | 0.008 |
| Calcium_UKBB | CVD_FinnGen | rs2249825  | C | G | -0.0122 | 0.0022 | 0.002  | 0.008 |
| Calcium_UKBB | CVD_FinnGen | rs2274224  | C | G | -0.0133 | 0.0020 | -0.025 | 0.008 |
| Calcium_UKBB | CVD_FinnGen | rs2309233  | C | T | 0.0161  | 0.0022 | 0.014  | 0.009 |
| Calcium_UKBB | CVD_FinnGen | rs2327774  | C | T | -0.0165 | 0.0020 | 0.002  | 0.008 |
| Calcium_UKBB | CVD_FinnGen | rs2335534  | A | G | -0.0298 | 0.0025 | -0.019 | 0.010 |
| Calcium_UKBB | CVD_FinnGen | rs2343592  | G | A | -0.0178 | 0.0022 | -0.002 | 0.009 |
| Calcium_UKBB | CVD_FinnGen | rs2370218  | T | G | -0.0163 | 0.0023 | 0.010  | 0.008 |
| Calcium_UKBB | CVD_FinnGen | rs2395158  | G | A | -0.0179 | 0.0026 | 0.001  | 0.012 |
| Calcium_UKBB | CVD_FinnGen | rs2419886  | T | C | -0.0151 | 0.0022 | 0.014  | 0.009 |
| Calcium_UKBB | CVD_FinnGen | rs2647242  | G | A | -0.0154 | 0.0024 | -0.007 | 0.010 |
| Calcium_UKBB | CVD_FinnGen | rs2762938  | A | G | 0.0119  | 0.0020 | 0.000  | 0.008 |
| Calcium_UKBB | CVD_FinnGen | rs28520334 | T | G | 0.0165  | 0.0030 | -0.014 | 0.013 |
| Calcium_UKBB | CVD_FinnGen | rs28929474 | T | C | 0.0953  | 0.0069 | 0.014  | 0.028 |
| Calcium_UKBB | CVD_FinnGen | rs2930191  | A | G | -0.0158 | 0.0020 | -0.006 | 0.008 |
| Calcium_UKBB | CVD_FinnGen | rs2971855  | A | G | 0.0142  | 0.0021 | -0.017 | 0.008 |
| Calcium_UKBB | CVD_FinnGen | rs3011642  | T | C | 0.0148  | 0.0023 | 0.008  | 0.010 |
| Calcium_UKBB | CVD_FinnGen | rs3026445  | C | T | -0.0133 | 0.0020 | -0.017 | 0.008 |
| Calcium_UKBB | CVD_FinnGen | rs302650   | A | G | -0.0143 | 0.0020 | -0.002 | 0.008 |
| Calcium_UKBB | CVD_FinnGen | rs3091842  | A | G | 0.0733  | 0.0049 | 0.009  | 0.014 |
| Calcium_UKBB | CVD_FinnGen | rs3133548  | T | C | 0.0159  | 0.0028 | -0.004 | 0.011 |
| Calcium_UKBB | CVD_FinnGen | rs34290411 | G | C | 0.0134  | 0.0021 | 0.001  | 0.009 |
| Calcium_UKBB | CVD_FinnGen | rs35118755 | T | C | 0.0177  | 0.0027 | -0.021 | 0.014 |
| Calcium_UKBB | CVD_FinnGen | rs35320690 | C | T | 0.0195  | 0.0022 | -0.006 | 0.009 |
| Calcium_UKBB | CVD_FinnGen | rs35590487 | T | C | -0.0165 | 0.0023 | 0.001  | 0.009 |
| Calcium_UKBB | CVD_FinnGen | rs35751693 | T | C | 0.0326  | 0.0052 | 0.020  | 0.026 |
| Calcium_UKBB | CVD_FinnGen | rs35852840 | A | C | 0.0240  | 0.0041 | -0.021 | 0.019 |
| Calcium_UKBB | CVD_FinnGen | rs36032443 | C | A | -0.0190 | 0.0020 | 0.008  | 0.008 |
| Calcium_UKBB | CVD_FinnGen | rs36086195 | T | C | 0.0154  | 0.0020 | 0.010  | 0.008 |
| Calcium_UKBB | CVD_FinnGen | rs36104352 | C | A | 0.0222  | 0.0030 | 0.003  | 0.015 |
| Calcium_UKBB | CVD_FinnGen | rs3748861  | A | C | -0.0134 | 0.0024 | 0.004  | 0.010 |
| Calcium_UKBB | CVD_FinnGen | rs3794695  | T | C | 0.0158  | 0.0025 | 0.008  | 0.010 |
| Calcium_UKBB | CVD_FinnGen | rs3795243  | C | G | 0.0170  | 0.0029 | 0.004  | 0.017 |
| Calcium_UKBB | CVD_FinnGen | rs3822858  | C | T | -0.0126 | 0.0020 | 0.006  | 0.008 |

|              |             |            |    |   |         |        |        |       |
|--------------|-------------|------------|----|---|---------|--------|--------|-------|
| Calcium_UKBB | CVD_FinnGen | rs3931841  | G  | A | -0.0196 | 0.0021 | -0.011 | 0.008 |
| Calcium_UKBB | CVD_FinnGen | rs4082330  | T  | C | 0.0154  | 0.0025 | -0.003 | 0.012 |
| Calcium_UKBB | CVD_FinnGen | rs41278174 | A  | G | 0.0390  | 0.0059 | -0.005 | 0.021 |
| Calcium_UKBB | CVD_FinnGen | rs4239142  | G  | A | -0.0132 | 0.0022 | -0.014 | 0.009 |
| Calcium_UKBB | CVD_FinnGen | rs4320103  | G  | A | 0.0345  | 0.0051 | -0.017 | 0.019 |
| Calcium_UKBB | CVD_FinnGen | rs4324076  | C  | A | -0.0140 | 0.0019 | 0.013  | 0.008 |
| Calcium_UKBB | CVD_FinnGen | rs4633480  | A  | G | 0.0151  | 0.0020 | 0.006  | 0.008 |
| Calcium_UKBB | CVD_FinnGen | rs4653767  | C  | T | -0.0150 | 0.0023 | 0.002  | 0.009 |
| Calcium_UKBB | CVD_FinnGen | rs4721467  | T  | A | -0.0174 | 0.0022 | 0.010  | 0.010 |
| Calcium_UKBB | CVD_FinnGen | rs4744854  | C  | G | -0.0243 | 0.0020 | 0.005  | 0.008 |
| Calcium_UKBB | CVD_FinnGen | rs4758621  | G  | A | -0.0204 | 0.0021 | -0.016 | 0.009 |
| Calcium_UKBB | CVD_FinnGen | rs4790310  | T  | C | -0.0148 | 0.0020 | 0.008  | 0.008 |
| Calcium_UKBB | CVD_FinnGen | rs4841132  | G  | A | 0.0425  | 0.0034 | 0.002  | 0.012 |
| Calcium_UKBB | CVD_FinnGen | rs4935009  | C  | A | -0.0172 | 0.0029 | 0.003  | 0.011 |
| Calcium_UKBB | CVD_FinnGen | rs4938642  | C  | G | 0.0254  | 0.0037 | -0.020 | 0.024 |
| Calcium_UKBB | CVD_FinnGen | rs498490   | T  | C | -0.0232 | 0.0026 | -0.003 | 0.009 |
| Calcium_UKBB | CVD_FinnGen | rs55772024 | A  | G | -0.0133 | 0.0023 | 0.002  | 0.008 |
| Calcium_UKBB | CVD_FinnGen | rs56406311 | T  | C | 0.0134  | 0.0020 | -0.023 | 0.008 |
| Calcium_UKBB | CVD_FinnGen | rs5751350  | A  | G | 0.0127  | 0.0021 | 0.015  | 0.008 |
| Calcium_UKBB | CVD_FinnGen | rs5760495  | T  | C | 0.0123  | 0.0020 | 0.009  | 0.008 |
| Calcium_UKBB | CVD_FinnGen | rs5786388  | CA | C | 0.0170  | 0.0020 | -0.003 | 0.008 |
| Calcium_UKBB | CVD_FinnGen | rs59821684 | G  | A | 0.0416  | 0.0058 | -0.004 | 0.040 |
| Calcium_UKBB | CVD_FinnGen | rs6127099  | T  | A | -0.0407 | 0.0022 | -0.012 | 0.009 |
| Calcium_UKBB | CVD_FinnGen | rs62134679 | C  | T | 0.0164  | 0.0027 | 0.008  | 0.012 |
| Calcium_UKBB | CVD_FinnGen | rs62211622 | A  | C | -0.0141 | 0.0025 | -0.021 | 0.012 |
| Calcium_UKBB | CVD_FinnGen | rs62309863 | T  | G | -0.0114 | 0.0020 | -0.008 | 0.008 |
| Calcium_UKBB | CVD_FinnGen | rs62472728 | T  | C | 0.0237  | 0.0041 | 0.015  | 0.013 |
| Calcium_UKBB | CVD_FinnGen | rs634916   | T  | A | -0.0106 | 0.0019 | -0.006 | 0.008 |
| Calcium_UKBB | CVD_FinnGen | rs6580981  | A  | G | -0.0137 | 0.0020 | 0.000  | 0.008 |
| Calcium_UKBB | CVD_FinnGen | rs66920316 | A  | G | -0.0153 | 0.0024 | -0.007 | 0.012 |
| Calcium_UKBB | CVD_FinnGen | rs6698689  | A  | G | -0.0229 | 0.0030 | 0.008  | 0.013 |
| Calcium_UKBB | CVD_FinnGen | rs6741561  | T  | C | -0.0291 | 0.0020 | -0.003 | 0.008 |
| Calcium_UKBB | CVD_FinnGen | rs6841429  | A  | C | -0.0300 | 0.0026 | 0.003  | 0.012 |
| Calcium_UKBB | CVD_FinnGen | rs7003580  | T  | C | 0.0123  | 0.0020 | 0.003  | 0.008 |

|              |             |            |   |   |         |        |        |       |
|--------------|-------------|------------|---|---|---------|--------|--------|-------|
| Calcium_UKBB | CVD_FinnGen | rs710217   | G | A | 0.0183  | 0.0019 | -0.005 | 0.008 |
| Calcium_UKBB | CVD_FinnGen | rs71565393 | T | C | 0.0140  | 0.0026 | -0.005 | 0.011 |
| Calcium_UKBB | CVD_FinnGen | rs71658797 | A | T | 0.0164  | 0.0030 | 0.014  | 0.012 |
| Calcium_UKBB | CVD_FinnGen | rs7221118  | C | T | -0.0151 | 0.0024 | 0.002  | 0.008 |
| Calcium_UKBB | CVD_FinnGen | rs72697816 | T | C | 0.0149  | 0.0026 | 0.001  | 0.009 |
| Calcium_UKBB | CVD_FinnGen | rs7370877  | G | A | -0.0132 | 0.0020 | 0.006  | 0.008 |
| Calcium_UKBB | CVD_FinnGen | rs7402977  | A | G | -0.0125 | 0.0022 | -0.016 | 0.009 |
| Calcium_UKBB | CVD_FinnGen | rs74230087 | A | G | -0.0422 | 0.0036 | -0.016 | 0.015 |
| Calcium_UKBB | CVD_FinnGen | rs75448233 | T | C | 0.0253  | 0.0043 | 0.026  | 0.021 |
| Calcium_UKBB | CVD_FinnGen | rs7546838  | G | A | 0.0152  | 0.0021 | -0.001 | 0.008 |
| Calcium_UKBB | CVD_FinnGen | rs7559013  | C | A | 0.0182  | 0.0029 | 0.004  | 0.013 |
| Calcium_UKBB | CVD_FinnGen | rs75702986 | A | G | 0.0277  | 0.0025 | 0.010  | 0.010 |
| Calcium_UKBB | CVD_FinnGen | rs7587636  | A | G | -0.0127 | 0.0020 | 0.020  | 0.008 |
| Calcium_UKBB | CVD_FinnGen | rs75895430 | G | C | 0.0619  | 0.0056 | 0.013  | 0.032 |
| Calcium_UKBB | CVD_FinnGen | rs7592216  | T | G | -0.0158 | 0.0029 | 0.009  | 0.014 |
| Calcium_UKBB | CVD_FinnGen | rs7599     | G | A | -0.0146 | 0.0020 | 0.005  | 0.008 |
| Calcium_UKBB | CVD_FinnGen | rs76947531 | C | T | -0.0689 | 0.0031 | 0.001  | 0.016 |
| Calcium_UKBB | CVD_FinnGen | rs7730344  | A | C | 0.0139  | 0.0021 | -0.010 | 0.008 |
| Calcium_UKBB | CVD_FinnGen | rs775249   | T | C | -0.0122 | 0.0022 | 0.016  | 0.008 |
| Calcium_UKBB | CVD_FinnGen | rs77542162 | G | A | -0.0668 | 0.0065 | 0.016  | 0.048 |
| Calcium_UKBB | CVD_FinnGen | rs777588   | A | G | -0.0223 | 0.0020 | -0.003 | 0.008 |
| Calcium_UKBB | CVD_FinnGen | rs778368   | C | G | -0.0112 | 0.0020 | -0.016 | 0.009 |
| Calcium_UKBB | CVD_FinnGen | rs7786368  | C | T | -0.0187 | 0.0020 | -0.004 | 0.008 |
| Calcium_UKBB | CVD_FinnGen | rs79501693 | C | T | -0.0377 | 0.0068 | 0.047  | 0.036 |
| Calcium_UKBB | CVD_FinnGen | rs8054061  | C | T | 0.0146  | 0.0019 | 0.025  | 0.008 |
| Calcium_UKBB | CVD_FinnGen | rs838717   | A | G | -0.0354 | 0.0020 | -0.014 | 0.008 |
| Calcium_UKBB | CVD_FinnGen | rs883951   | G | A | 0.0178  | 0.0022 | 0.011  | 0.008 |
| Calcium_UKBB | CVD_FinnGen | rs928760   | T | C | -0.0142 | 0.0021 | 0.020  | 0.009 |
| Calcium_UKBB | CVD_FinnGen | rs9379881  | C | T | -0.0116 | 0.0019 | 0.008  | 0.008 |
| Calcium_UKBB | CVD_FinnGen | rs9388399  | C | T | -0.0188 | 0.0021 | 0.009  | 0.008 |
| Calcium_UKBB | CVD_FinnGen | rs9399697  | T | C | 0.0110  | 0.0019 | -0.010 | 0.008 |
| Calcium_UKBB | CVD_FinnGen | rs9419741  | G | A | 0.0118  | 0.0019 | 0.000  | 0.008 |
| Calcium_UKBB | CVD_FinnGen | rs9447004  | G | A | -0.0323 | 0.0019 | -0.010 | 0.008 |
| Calcium_UKBB | CVD_FinnGen | rs945890   | T | A | -0.0130 | 0.0022 | 0.003  | 0.009 |

|              |               |             |   |   |         |        |        |       |
|--------------|---------------|-------------|---|---|---------|--------|--------|-------|
| Calcium_UKBB | CVD_FinnGen   | rs948737    | T | C | -0.0116 | 0.0020 | 0.004  | 0.008 |
| Calcium_UKBB | CVD_FinnGen   | rs949300    | A | T | 0.0118  | 0.0020 | 0.006  | 0.008 |
| Calcium_UKBB | CVD_FinnGen   | rs9530      | G | A | -0.0241 | 0.0019 | -0.008 | 0.008 |
| Calcium_UKBB | CVD_FinnGen   | rs9532958   | A | G | 0.0264  | 0.0027 | 0.005  | 0.010 |
| Calcium_UKBB | Longevity_90% | rs36086195  | T | C | 0.0018  | 0.0002 | -0.034 | 0.020 |
| Calcium_UKBB | Longevity_90% | rs12132412  | G | A | 0.0025  | 0.0002 | 0.004  | 0.022 |
| Calcium_UKBB | Longevity_90% | rs10917386  | T | C | 0.0018  | 0.0003 | 0.000  | 0.021 |
| Calcium_UKBB | Longevity_90% | rs710217    | G | A | 0.0022  | 0.0002 | -0.010 | 0.019 |
| Calcium_UKBB | Longevity_90% | rs112174050 | T | C | 0.0096  | 0.0007 | -0.087 | 0.087 |
| Calcium_UKBB | Longevity_90% | rs75895430  | G | C | 0.0074  | 0.0007 | -0.041 | 0.079 |
| Calcium_UKBB | Longevity_90% | rs71658797  | A | T | 0.0020  | 0.0004 | 0.041  | 0.032 |
| Calcium_UKBB | Longevity_90% | rs165316    | A | G | 0.0017  | 0.0003 | -0.027 | 0.025 |
| Calcium_UKBB | Longevity_90% | rs72697816  | T | C | 0.0018  | 0.0003 | 0.026  | 0.026 |
| Calcium_UKBB | Longevity_90% | rs10754439  | T | G | 0.0014  | 0.0002 | -0.006 | 0.019 |
| Calcium_UKBB | Longevity_90% | rs80350997  | A | G | 0.0039  | 0.0004 | 0.014  | 0.037 |
| Calcium_UKBB | Longevity_90% | rs12743084  | C | G | 0.0024  | 0.0002 | 0.022  | 0.021 |
| Calcium_UKBB | Longevity_90% | rs7546838   | G | A | 0.0018  | 0.0002 | 0.007  | 0.020 |
| Calcium_UKBB | Longevity_90% | rs11588907  | C | T | 0.0015  | 0.0002 | -0.001 | 0.020 |
| Calcium_UKBB | Longevity_90% | rs1036332   | C | A | 0.0020  | 0.0003 | 0.010  | 0.022 |
| Calcium_UKBB | Longevity_90% | rs11117777  | C | T | 0.0019  | 0.0003 | 0.042  | 0.027 |
| Calcium_UKBB | Longevity_90% | rs1497826   | G | C | 0.0022  | 0.0002 | 0.021  | 0.020 |
| Calcium_UKBB | Longevity_90% | rs6698689   | G | A | 0.0028  | 0.0004 | 0.041  | 0.031 |
| Calcium_UKBB | Longevity_90% | rs4653767   | T | C | 0.0018  | 0.0003 | -0.016 | 0.021 |
| Calcium_UKBB | Longevity_90% | rs66920316  | G | A | 0.0018  | 0.0003 | 0.036  | 0.025 |
| Calcium_UKBB | Longevity_90% | rs12998379  | G | A | 0.0022  | 0.0003 | -0.037 | 0.029 |
| Calcium_UKBB | Longevity_90% | rs7587636   | G | A | 0.0015  | 0.0002 | 0.008  | 0.020 |
| Calcium_UKBB | Longevity_90% | rs1260326   | T | C | 0.0045  | 0.0002 | -0.029 | 0.020 |
| Calcium_UKBB | Longevity_90% | rs62134679  | C | T | 0.0020  | 0.0003 | 0.026  | 0.026 |
| Calcium_UKBB | Longevity_90% | rs777588    | G | A | 0.0027  | 0.0002 | 0.035  | 0.020 |
| Calcium_UKBB | Longevity_90% | rs7370877   | A | G | 0.0016  | 0.0002 | 0.011  | 0.020 |
| Calcium_UKBB | Longevity_90% | rs6741561   | C | T | 0.0035  | 0.0002 | 0.031  | 0.020 |
| Calcium_UKBB | Longevity_90% | rs35751693  | T | C | 0.0039  | 0.0006 | 0.120  | 0.067 |
| Calcium_UKBB | Longevity_90% | rs1374161   | G | A | 0.0020  | 0.0002 | -0.037 | 0.020 |
| Calcium_UKBB | Longevity_90% | rs3931841   | A | G | 0.0024  | 0.0003 | -0.004 | 0.021 |



|              |               |             |   |   |        |        |        |       |
|--------------|---------------|-------------|---|---|--------|--------|--------|-------|
| Calcium_UKBB | Longevity_90% | rs3748861   | C | A | 0.0016 | 0.0003 | 0.016  | 0.026 |
| Calcium_UKBB | Longevity_90% | rs13389219  | C | T | 0.0015 | 0.0002 | 0.006  | 0.020 |
| Calcium_UKBB | Longevity_90% | rs7592216   | G | T | 0.0019 | 0.0003 | -0.049 | 0.029 |
| Calcium_UKBB | Longevity_90% | rs12613807  | C | T | 0.0015 | 0.0002 | -0.012 | 0.019 |
| Calcium_UKBB | Longevity_90% | rs7559013   | C | A | 0.0022 | 0.0003 | 0.006  | 0.029 |
| Calcium_UKBB | Longevity_90% | rs778368    | G | C | 0.0013 | 0.0002 | -0.018 | 0.020 |
| Calcium_UKBB | Longevity_90% | rs838717    | G | A | 0.0042 | 0.0002 | -0.009 | 0.019 |
| Calcium_UKBB | Longevity_90% | rs2971855   | A | G | 0.0017 | 0.0003 | 0.016  | 0.021 |
| Calcium_UKBB | Longevity_90% | rs1476698   | A | G | 0.0019 | 0.0002 | -0.013 | 0.020 |
| Calcium_UKBB | Longevity_90% | rs28520334  | T | G | 0.0020 | 0.0004 | -0.016 | 0.032 |
| Calcium_UKBB | Longevity_90% | rs1801282   | C | G | 0.0034 | 0.0004 | -0.012 | 0.029 |
| Calcium_UKBB | Longevity_90% | rs1354034   | T | C | 0.0017 | 0.0002 | -0.032 | 0.020 |
| Calcium_UKBB | Longevity_90% | rs138789759 | A | G | 0.0043 | 0.0004 | -0.058 | 0.034 |
| Calcium_UKBB | Longevity_90% | rs115227958 | C | T | 0.0069 | 0.0006 | 0.037  | 0.060 |
| Calcium_UKBB | Longevity_90% | rs76947531  | T | C | 0.0083 | 0.0004 | 0.056  | 0.034 |
| Calcium_UKBB | Longevity_90% | rs17200894  | G | C | 0.0125 | 0.0003 | -0.071 | 0.027 |
| Calcium_UKBB | Longevity_90% | rs35320690  | C | T | 0.0023 | 0.0003 | -0.009 | 0.022 |
| Calcium_UKBB | Longevity_90% | rs56406311  | T | C | 0.0016 | 0.0002 | 0.007  | 0.021 |
| Calcium_UKBB | Longevity_90% | rs13073106  | T | C | 0.0034 | 0.0002 | -0.024 | 0.020 |
| Calcium_UKBB | Longevity_90% | rs10513810  | A | G | 0.0024 | 0.0004 | -0.003 | 0.030 |
| Calcium_UKBB | Longevity_90% | rs13108218  | A | G | 0.0036 | 0.0002 | -0.040 | 0.022 |
| Calcium_UKBB | Longevity_90% | rs3795243   | C | G | 0.0020 | 0.0004 | 0.012  | 0.030 |
| Calcium_UKBB | Longevity_90% | rs11730491  | T | G | 0.0019 | 0.0003 | -0.019 | 0.026 |
| Calcium_UKBB | Longevity_90% | rs6841429   | C | A | 0.0036 | 0.0003 | -0.003 | 0.026 |
| Calcium_UKBB | Longevity_90% | rs13107325  | C | T | 0.0058 | 0.0004 | 0.130  | 0.040 |
| Calcium_UKBB | Longevity_90% | rs2647242   | A | G | 0.0018 | 0.0003 | -0.014 | 0.024 |
| Calcium_UKBB | Longevity_90% | rs62309863  | G | T | 0.0014 | 0.0002 | 0.025  | 0.020 |
| Calcium_UKBB | Longevity_90% | rs4320103   | G | A | 0.0041 | 0.0006 | -0.030 | 0.049 |
| Calcium_UKBB | Longevity_90% | rs7730344   | A | C | 0.0017 | 0.0003 | -0.039 | 0.021 |
| Calcium_UKBB | Longevity_90% | rs17132144  | C | T | 0.0023 | 0.0004 | -0.015 | 0.034 |
| Calcium_UKBB | Longevity_90% | rs12519940  | C | T | 0.0024 | 0.0003 | 0.017  | 0.022 |
| Calcium_UKBB | Longevity_90% | rs113955164 | A | G | 0.0019 | 0.0003 | 0.012  | 0.026 |
| Calcium_UKBB | Longevity_90% | rs9379881   | T | C | 0.0014 | 0.0002 | -0.012 | 0.019 |
| Calcium_UKBB | Longevity_90% | rs2395158   | A | G | 0.0021 | 0.0003 | 0.035  | 0.038 |

|              |               |             |   |   |        |        |        |       |
|--------------|---------------|-------------|---|---|--------|--------|--------|-------|
| Calcium_UKBB | Longevity_90% | rs71565393  | T | C | 0.0017 | 0.0003 | 0.029  | 0.026 |
| Calcium_UKBB | Longevity_90% | rs55772024  | G | A | 0.0016 | 0.0003 | 0.008  | 0.022 |
| Calcium_UKBB | Longevity_90% | rs9447004   | A | G | 0.0039 | 0.0002 | 0.032  | 0.019 |
| Calcium_UKBB | Longevity_90% | rs9399697   | T | C | 0.0013 | 0.0002 | 0.008  | 0.019 |
| Calcium_UKBB | Longevity_90% | rs3822858   | T | C | 0.0015 | 0.0002 | -0.027 | 0.020 |
| Calcium_UKBB | Longevity_90% | rs9388399   | T | C | 0.0023 | 0.0003 | 0.027  | 0.022 |
| Calcium_UKBB | Longevity_90% | rs945890    | A | T | 0.0016 | 0.0003 | 0.028  | 0.022 |
| Calcium_UKBB | Longevity_90% | rs1763519   | G | C | 0.0030 | 0.0002 | 0.017  | 0.021 |
| Calcium_UKBB | Longevity_90% | rs2327774   | T | C | 0.0020 | 0.0002 | -0.032 | 0.026 |
| Calcium_UKBB | Longevity_90% | rs634916    | A | T | 0.0013 | 0.0002 | -0.029 | 0.019 |
| Calcium_UKBB | Longevity_90% | rs4721467   | A | T | 0.0021 | 0.0003 | 0.023  | 0.022 |
| Calcium_UKBB | Longevity_90% | rs9530      | A | G | 0.0029 | 0.0002 | -0.019 | 0.019 |
| Calcium_UKBB | Longevity_90% | rs7786368   | T | C | 0.0022 | 0.0002 | -0.006 | 0.019 |
| Calcium_UKBB | Longevity_90% | rs17164683  | C | T | 0.0020 | 0.0003 | -0.039 | 0.022 |
| Calcium_UKBB | Longevity_90% | rs257380    | T | A | 0.0017 | 0.0002 | 0.001  | 0.021 |
| Calcium_UKBB | Longevity_90% | rs62472728  | T | C | 0.0028 | 0.0005 | -0.040 | 0.041 |
| Calcium_UKBB | Longevity_90% | rs115946508 | A | C | 0.0031 | 0.0004 | 0.081  | 0.031 |
| Calcium_UKBB | Longevity_90% | rs4841132   | G | A | 0.0051 | 0.0004 | -0.003 | 0.035 |
| Calcium_UKBB | Longevity_90% | rs2309233   | C | T | 0.0019 | 0.0003 | 0.036  | 0.024 |
| Calcium_UKBB | Longevity_90% | rs36104352  | C | A | 0.0027 | 0.0004 | -0.049 | 0.031 |
| Calcium_UKBB | Longevity_90% | rs10958700  | G | T | 0.0018 | 0.0003 | -0.020 | 0.024 |
| Calcium_UKBB | Longevity_90% | rs12675477  | T | C | 0.0017 | 0.0003 | -0.018 | 0.022 |
| Calcium_UKBB | Longevity_90% | rs3133548   | T | C | 0.0019 | 0.0003 | -0.025 | 0.028 |
| Calcium_UKBB | Longevity_90% | rs2343592   | A | G | 0.0021 | 0.0003 | -0.020 | 0.022 |
| Calcium_UKBB | Longevity_90% | rs13259549  | C | T | 0.0014 | 0.0002 | 0.014  | 0.020 |
| Calcium_UKBB | Longevity_90% | rs7003580   | T | C | 0.0015 | 0.0002 | 0.016  | 0.021 |
| Calcium_UKBB | Longevity_90% | rs2370218   | G | T | 0.0020 | 0.0003 | -0.039 | 0.023 |
| Calcium_UKBB | Longevity_90% | rs883951    | G | A | 0.0021 | 0.0003 | 0.021  | 0.022 |
| Calcium_UKBB | Longevity_90% | rs12378991  | G | A | 0.0034 | 0.0004 | 0.004  | 0.038 |
| Calcium_UKBB | Longevity_90% | rs4744854   | G | C | 0.0029 | 0.0002 | 0.060  | 0.021 |
| Calcium_UKBB | Longevity_90% | rs62575977  | T | C | 0.0018 | 0.0002 | 0.015  | 0.020 |
| Calcium_UKBB | Longevity_90% | rs12339541  | C | A | 0.0056 | 0.0005 | -0.055 | 0.040 |
| Calcium_UKBB | Longevity_90% | rs10819178  | G | T | 0.0030 | 0.0002 | -0.030 | 0.020 |
| Calcium_UKBB | Longevity_90% | rs11792928  | C | T | 0.0015 | 0.0003 | -0.028 | 0.022 |

|              |               |             |   |   |        |        |        |       |
|--------------|---------------|-------------|---|---|--------|--------|--------|-------|
| Calcium_UKBB | Longevity_90% | rs498490    | C | T | 0.0028 | 0.0003 | -0.041 | 0.025 |
| Calcium_UKBB | Longevity_90% | rs117179023 | C | T | 0.0064 | 0.0011 | 0.088  | 0.092 |
| Calcium_UKBB | Longevity_90% | rs74230087  | G | A | 0.0051 | 0.0004 | -0.022 | 0.037 |
| Calcium_UKBB | Longevity_90% | rs112371897 | T | C | 0.0064 | 0.0004 | -0.016 | 0.033 |
| Calcium_UKBB | Longevity_90% | rs3011642   | T | C | 0.0018 | 0.0003 | 0.023  | 0.023 |
| Calcium_UKBB | Longevity_90% | rs17774672  | G | A | 0.0025 | 0.0003 | -0.010 | 0.026 |
| Calcium_UKBB | Longevity_90% | rs4935009   | A | C | 0.0021 | 0.0003 | 0.086  | 0.028 |
| Calcium_UKBB | Longevity_90% | rs4082330   | T | C | 0.0018 | 0.0003 | -0.031 | 0.028 |
| Calcium_UKBB | Longevity_90% | rs9419741   | G | A | 0.0014 | 0.0002 | -0.039 | 0.020 |
| Calcium_UKBB | Longevity_90% | rs2274224   | G | C | 0.0016 | 0.0002 | -0.016 | 0.020 |
| Calcium_UKBB | Longevity_90% | rs2419886   | C | T | 0.0018 | 0.0003 | -0.028 | 0.023 |
| Calcium_UKBB | Longevity_90% | rs4758621   | A | G | 0.0025 | 0.0003 | 0.009  | 0.022 |
| Calcium_UKBB | Longevity_90% | rs2004315   | T | C | 0.0030 | 0.0002 | -0.019 | 0.020 |
| Calcium_UKBB | Longevity_90% | rs2930191   | G | A | 0.0019 | 0.0002 | -0.039 | 0.022 |
| Calcium_UKBB | Longevity_90% | rs4633480   | A | G | 0.0018 | 0.0002 | 0.003  | 0.019 |
| Calcium_UKBB | Longevity_90% | rs12793731  | T | C | 0.0014 | 0.0002 | 0.016  | 0.030 |
| Calcium_UKBB | Longevity_90% | rs302650    | G | A | 0.0017 | 0.0002 | 0.006  | 0.019 |
| Calcium_UKBB | Longevity_90% | rs948737    | C | T | 0.0014 | 0.0002 | 0.012  | 0.021 |
| Calcium_UKBB | Longevity_90% | rs141949189 | T | A | 0.0014 | 0.0002 | -0.007 | 0.028 |
| Calcium_UKBB | Longevity_90% | rs4938642   | C | G | 0.0030 | 0.0004 | -0.007 | 0.038 |
| Calcium_UKBB | Longevity_90% | rs949300    | A | T | 0.0014 | 0.0002 | -0.011 | 0.020 |
| Calcium_UKBB | Longevity_90% | rs73632745  | C | T | 0.0055 | 0.0004 | 0.058  | 0.036 |
| Calcium_UKBB | Longevity_90% | rs117213754 | A | G | 0.0098 | 0.0010 | -0.040 | 0.091 |
| Calcium_UKBB | Longevity_90% | rs117080167 | C | T | 0.0030 | 0.0004 | 0.062  | 0.035 |
| Calcium_UKBB | Longevity_90% | rs6580981   | G | A | 0.0016 | 0.0002 | 0.011  | 0.019 |
| Calcium_UKBB | Longevity_90% | rs775249    | C | T | 0.0015 | 0.0003 | 0.000  | 0.022 |
| Calcium_UKBB | Longevity_90% | rs10858935  | G | A | 0.0017 | 0.0003 | 0.018  | 0.022 |
| Calcium_UKBB | Longevity_90% | rs3026445   | T | C | 0.0016 | 0.0002 | -0.037 | 0.020 |
| Calcium_UKBB | Longevity_90% | rs2249825   | G | C | 0.0015 | 0.0003 | -0.014 | 0.023 |
| Calcium_UKBB | Longevity_90% | rs9532958   | A | G | 0.0032 | 0.0003 | -0.018 | 0.028 |
| Calcium_UKBB | Longevity_90% | rs12583851  | T | C | 0.0022 | 0.0003 | -0.033 | 0.022 |
| Calcium_UKBB | Longevity_90% | rs11621792  | T | C | 0.0015 | 0.0002 | -0.035 | 0.021 |
| Calcium_UKBB | Longevity_90% | rs35852840  | A | C | 0.0029 | 0.0005 | -0.002 | 0.045 |
| Calcium_UKBB | Longevity_90% | rs12147703  | G | A | 0.0026 | 0.0004 | -0.031 | 0.031 |

|              |               |             |   |   |        |        |        |       |
|--------------|---------------|-------------|---|---|--------|--------|--------|-------|
| Calcium_UKBB | Longevity_90% | rs28929474  | T | C | 0.0114 | 0.0008 | -0.061 | 0.076 |
| Calcium_UKBB | Longevity_90% | rs17580     | A | T | 0.0043 | 0.0005 | -0.065 | 0.051 |
| Calcium_UKBB | Longevity_90% | rs35590487  | C | T | 0.0020 | 0.0003 | 0.011  | 0.027 |
| Calcium_UKBB | Longevity_90% | rs7402977   | G | A | 0.0015 | 0.0003 | -0.018 | 0.022 |
| Calcium_UKBB | Longevity_90% | rs147233090 | T | C | 0.0095 | 0.0008 | 0.143  | 0.061 |
| Calcium_UKBB | Longevity_90% | rs4324076   | A | C | 0.0017 | 0.0002 | -0.018 | 0.019 |
| Calcium_UKBB | Longevity_90% | rs36032443  | A | C | 0.0023 | 0.0002 | 0.022  | 0.020 |
| Calcium_UKBB | Longevity_90% | rs60616569  | G | A | 0.0017 | 0.0003 | -0.033 | 0.034 |
| Calcium_UKBB | Longevity_90% | rs11629876  | C | T | 0.0016 | 0.0002 | -0.049 | 0.020 |
| Calcium_UKBB | Longevity_90% | rs41278174  | A | G | 0.0047 | 0.0007 | 0.003  | 0.078 |
| Calcium_UKBB | Longevity_90% | rs12922549  | C | T | 0.0021 | 0.0003 | 0.012  | 0.025 |
| Calcium_UKBB | Longevity_90% | rs3794695   | T | C | 0.0019 | 0.0003 | 0.005  | 0.025 |
| Calcium_UKBB | Longevity_90% | rs1858800   | T | C | 0.0028 | 0.0002 | 0.033  | 0.020 |
| Calcium_UKBB | Longevity_90% | rs8054061   | C | T | 0.0018 | 0.0002 | -0.013 | 0.019 |
| Calcium_UKBB | Longevity_90% | rs12918968  | A | C | 0.0028 | 0.0002 | 0.016  | 0.022 |
| Calcium_UKBB | Longevity_90% | rs11078597  | C | T | 0.0046 | 0.0003 | -0.007 | 0.028 |
| Calcium_UKBB | Longevity_90% | rs4790310   | C | T | 0.0018 | 0.0002 | 0.017  | 0.020 |
| Calcium_UKBB | Longevity_90% | rs75448233  | T | C | 0.0030 | 0.0005 | 0.113  | 0.051 |
| Calcium_UKBB | Longevity_90% | rs2001884   | T | A | 0.0016 | 0.0002 | 0.012  | 0.019 |
| Calcium_UKBB | Longevity_90% | rs4239142   | A | G | 0.0016 | 0.0003 | 0.008  | 0.022 |
| Calcium_UKBB | Longevity_90% | rs7221118   | T | C | 0.0018 | 0.0003 | -0.018 | 0.024 |
| Calcium_UKBB | Longevity_90% | rs77704893  | C | T | 0.0039 | 0.0005 | 0.018  | 0.035 |
| Calcium_UKBB | Longevity_90% | rs62071306  | A | C | 0.0021 | 0.0003 | 0.041  | 0.023 |
| Calcium_UKBB | Longevity_90% | rs77542162  | A | G | 0.0080 | 0.0008 | -0.016 | 0.077 |
| Calcium_UKBB | Longevity_90% | rs34290411  | G | C | 0.0016 | 0.0003 | -0.001 | 0.022 |
| Calcium_UKBB | Longevity_90% | rs150268548 | A | G | 0.0033 | 0.0005 | -0.026 | 0.044 |
| Calcium_UKBB | Longevity_90% | rs1672991   | G | A | 0.0068 | 0.0005 | 0.018  | 0.040 |
| Calcium_UKBB | Longevity_90% | rs75702986  | A | G | 0.0033 | 0.0003 | 0.028  | 0.027 |
| Calcium_UKBB | Longevity_90% | rs7599      | A | G | 0.0018 | 0.0002 | -0.014 | 0.020 |
| Calcium_UKBB | Longevity_90% | rs12982234  | C | T | 0.0054 | 0.0006 | 0.007  | 0.060 |
| Calcium_UKBB | Longevity_90% | rs2335534   | G | A | 0.0036 | 0.0003 | 0.018  | 0.025 |
| Calcium_UKBB | Longevity_90% | rs149807892 | T | C | 0.0059 | 0.0009 | -0.214 | 0.107 |
| Calcium_UKBB | Longevity_90% | rs79501693  | T | C | 0.0045 | 0.0008 | 0.044  | 0.077 |
| Calcium_UKBB | Longevity_90% | rs35118755  | T | C | 0.0021 | 0.0003 | -0.023 | 0.030 |

|              |                    |             |   |   |         |        |        |       |
|--------------|--------------------|-------------|---|---|---------|--------|--------|-------|
| Calcium_UKBB | Longevity_90%      | rs59821684  | G | A | 0.0050  | 0.0007 | -0.018 | 0.065 |
| Calcium_UKBB | Longevity_90%      | rs62211622  | C | A | 0.0017  | 0.0003 | 0.008  | 0.026 |
| Calcium_UKBB | Longevity_90%      | rs3091842   | A | G | 0.0088  | 0.0006 | -0.033 | 0.045 |
| Calcium_UKBB | Longevity_90%      | rs6127099   | A | T | 0.0049  | 0.0003 | 0.007  | 0.023 |
| Calcium_UKBB | Longevity_90%      | rs2762938   | A | G | 0.0014  | 0.0002 | -0.010 | 0.021 |
| Calcium_UKBB | Longevity_90%      | rs928760    | C | T | 0.0017  | 0.0003 | -0.007 | 0.021 |
| Calcium_UKBB | Longevity_90%      | rs5760495   | T | C | 0.0015  | 0.0002 | 0.018  | 0.027 |
| Calcium_UKBB | Longevity_90%      | rs1544432   | G | T | 0.0016  | 0.0003 | 0.013  | 0.022 |
| Calcium_UKBB | Longevity_90%      | rs5751350   | A | G | 0.0015  | 0.0002 | 0.009  | 0.021 |
| Calcium_UKBB | Longevity_90%_UKBB | rs1036332   | C | A | 0.0020  | 0.0003 | 0.021  | 0.030 |
| Calcium_UKBB | Longevity_90%_UKBB | rs10754439  | T | G | 0.0010  | 0.0002 | 0.016  | 0.027 |
| Calcium_UKBB | Longevity_90%_UKBB | rs10819178  | G | T | 0.0030  | 0.0002 | -0.015 | 0.027 |
| Calcium_UKBB | Longevity_90%_UKBB | rs10858935  | A | G | -0.0020 | 0.0003 | -0.021 | 0.028 |
| Calcium_UKBB | Longevity_90%_UKBB | rs10917386  | T | C | 0.0020  | 0.0003 | -0.024 | 0.028 |
| Calcium_UKBB | Longevity_90%_UKBB | rs10958700  | G | T | 0.0020  | 0.0003 | -0.015 | 0.031 |
| Calcium_UKBB | Longevity_90%_UKBB | rs11078597  | C | T | 0.0050  | 0.0003 | -0.036 | 0.034 |
| Calcium_UKBB | Longevity_90%_UKBB | rs11117777  | C | T | 0.0020  | 0.0003 | -0.005 | 0.036 |
| Calcium_UKBB | Longevity_90%_UKBB | rs112174050 | T | C | 0.0100  | 0.0007 | 0.049  | 0.083 |
| Calcium_UKBB | Longevity_90%_UKBB | rs112371897 | T | C | 0.0060  | 0.0004 | -0.028 | 0.045 |
| Calcium_UKBB | Longevity_90%_UKBB | rs115227958 | T | C | -0.0070 | 0.0006 | 0.012  | 0.071 |
| Calcium_UKBB | Longevity_90%_UKBB | rs11588907  | T | C | -0.0010 | 0.0002 | -0.009 | 0.028 |
| Calcium_UKBB | Longevity_90%_UKBB | rs115946508 | A | C | 0.0030  | 0.0004 | 0.076  | 0.042 |
| Calcium_UKBB | Longevity_90%_UKBB | rs11621792  | T | C | 0.0010  | 0.0002 | -0.001 | 0.026 |
| Calcium_UKBB | Longevity_90%_UKBB | rs11629876  | T | C | -0.0020 | 0.0002 | -0.012 | 0.028 |
| Calcium_UKBB | Longevity_90%_UKBB | rs11671393  | C | G | -0.0040 | 0.0006 | 0.000  | 0.068 |
| Calcium_UKBB | Longevity_90%_UKBB | rs116769926 | A | C | 0.0070  | 0.0008 | 0.071  | 0.086 |
| Calcium_UKBB | Longevity_90%_UKBB | rs117080167 | T | C | -0.0030 | 0.0004 | -0.061 | 0.048 |
| Calcium_UKBB | Longevity_90%_UKBB | rs117080418 | A | T | -0.0090 | 0.0012 | -0.170 | 0.134 |
| Calcium_UKBB | Longevity_90%_UKBB | rs117179023 | T | C | -0.0060 | 0.0011 | 0.137  | 0.120 |
| Calcium_UKBB | Longevity_90%_UKBB | rs117213754 | A | G | 0.0100  | 0.0010 | 0.072  | 0.109 |
| Calcium_UKBB | Longevity_90%_UKBB | rs11730491  | T | G | 0.0020  | 0.0003 | 0.031  | 0.035 |
| Calcium_UKBB | Longevity_90%_UKBB | rs117896857 | T | C | -0.0050 | 0.0007 | -0.014 | 0.081 |
| Calcium_UKBB | Longevity_90%_UKBB | rs11792928  | T | C | -0.0020 | 0.0003 | 0.010  | 0.029 |
| Calcium_UKBB | Longevity_90%_UKBB | rs1187117   | T | G | -0.0040 | 0.0003 | 0.126  | 0.034 |

|              |                    |             |   |   |         |        |        |       |
|--------------|--------------------|-------------|---|---|---------|--------|--------|-------|
| Calcium_UKBB | Longevity_90%_UKBB | rs12132412  | G | A | 0.0030  | 0.0002 | -0.031 | 0.027 |
| Calcium_UKBB | Longevity_90%_UKBB | rs12135382  | T | C | 0.0020  | 0.0002 | 0.003  | 0.027 |
| Calcium_UKBB | Longevity_90%_UKBB | rs12147703  | A | G | -0.0030 | 0.0004 | 0.045  | 0.043 |
| Calcium_UKBB | Longevity_90%_UKBB | rs12339541  | A | C | -0.0060 | 0.0005 | 0.031  | 0.053 |
| Calcium_UKBB | Longevity_90%_UKBB | rs12378991  | A | G | -0.0030 | 0.0004 | -0.031 | 0.048 |
| Calcium_UKBB | Longevity_90%_UKBB | rs12519940  | T | C | -0.0020 | 0.0003 | 0.007  | 0.029 |
| Calcium_UKBB | Longevity_90%_UKBB | rs12583851  | C | T | -0.0020 | 0.0003 | 0.032  | 0.030 |
| Calcium_UKBB | Longevity_90%_UKBB | rs1260326   | C | T | -0.0040 | 0.0002 | -0.003 | 0.027 |
| Calcium_UKBB | Longevity_90%_UKBB | rs12613807  | C | T | 0.0010  | 0.0002 | 0.015  | 0.026 |
| Calcium_UKBB | Longevity_90%_UKBB | rs12675477  | T | C | 0.0020  | 0.0003 | 0.018  | 0.029 |
| Calcium_UKBB | Longevity_90%_UKBB | rs12743084  | G | C | -0.0020 | 0.0002 | 0.009  | 0.026 |
| Calcium_UKBB | Longevity_90%_UKBB | rs12793731  | T | C | 0.0010  | 0.0002 | -0.028 | 0.026 |
| Calcium_UKBB | Longevity_90%_UKBB | rs12918968  | C | A | -0.0030 | 0.0002 | 0.033  | 0.026 |
| Calcium_UKBB | Longevity_90%_UKBB | rs12922549  | T | C | -0.0020 | 0.0003 | 0.011  | 0.031 |
| Calcium_UKBB | Longevity_90%_UKBB | rs12982234  | T | C | -0.0050 | 0.0006 | -0.209 | 0.067 |
| Calcium_UKBB | Longevity_90%_UKBB | rs12998379  | A | G | -0.0020 | 0.0003 | 0.038  | 0.033 |
| Calcium_UKBB | Longevity_90%_UKBB | rs13107325  | T | C | -0.0060 | 0.0004 | -0.059 | 0.050 |
| Calcium_UKBB | Longevity_90%_UKBB | rs13108218  | G | A | -0.0040 | 0.0002 | 0.052  | 0.027 |
| Calcium_UKBB | Longevity_90%_UKBB | rs13259549  | C | T | 0.0010  | 0.0002 | 0.011  | 0.027 |
| Calcium_UKBB | Longevity_90%_UKBB | rs13389219  | T | C | -0.0020 | 0.0002 | 0.058  | 0.027 |
| Calcium_UKBB | Longevity_90%_UKBB | rs1354034   | C | T | -0.0020 | 0.0002 | -0.026 | 0.027 |
| Calcium_UKBB | Longevity_90%_UKBB | rs1374161   | A | G | -0.0020 | 0.0002 | -0.026 | 0.026 |
| Calcium_UKBB | Longevity_90%_UKBB | rs138789759 | A | G | 0.0040  | 0.0004 | -0.018 | 0.050 |
| Calcium_UKBB | Longevity_90%_UKBB | rs147233090 | T | C | 0.0090  | 0.0008 | -0.029 | 0.085 |
| Calcium_UKBB | Longevity_90%_UKBB | rs148148022 | A | G | -0.0060 | 0.0010 | 0.077  | 0.116 |
| Calcium_UKBB | Longevity_90%_UKBB | rs1497826   | G | C | 0.0020  | 0.0002 | 0.001  | 0.027 |
| Calcium_UKBB | Longevity_90%_UKBB | rs149807892 | T | C | 0.0060  | 0.0009 | 0.209  | 0.104 |
| Calcium_UKBB | Longevity_90%_UKBB | rs150268548 | A | G | 0.0030  | 0.0005 | -0.078 | 0.052 |
| Calcium_UKBB | Longevity_90%_UKBB | rs1544432   | G | T | 0.0020  | 0.0003 | 0.009  | 0.030 |
| Calcium_UKBB | Longevity_90%_UKBB | rs164751    | T | G | -0.0020 | 0.0002 | -0.014 | 0.026 |
| Calcium_UKBB | Longevity_90%_UKBB | rs165316    | G | A | -0.0020 | 0.0003 | -0.010 | 0.033 |
| Calcium_UKBB | Longevity_90%_UKBB | rs1672991   | G | A | 0.0070  | 0.0005 | 0.128  | 0.052 |
| Calcium_UKBB | Longevity_90%_UKBB | rs17132144  | T | C | -0.0020 | 0.0004 | -0.026 | 0.045 |
| Calcium_UKBB | Longevity_90%_UKBB | rs17164683  | T | C | -0.0020 | 0.0003 | 0.045  | 0.030 |

|              |                    |            |   |   |         |        |        |       |
|--------------|--------------------|------------|---|---|---------|--------|--------|-------|
| Calcium_UKBB | Longevity_90%_UKBB | rs17200894 | G | C | 0.0130  | 0.0003 | -0.083 | 0.037 |
| Calcium_UKBB | Longevity_90%_UKBB | rs17580    | A | T | 0.0040  | 0.0005 | 0.083  | 0.062 |
| Calcium_UKBB | Longevity_90%_UKBB | rs1763519  | C | G | -0.0030 | 0.0002 | 0.007  | 0.027 |
| Calcium_UKBB | Longevity_90%_UKBB | rs17774672 | A | G | -0.0030 | 0.0003 | 0.051  | 0.036 |
| Calcium_UKBB | Longevity_90%_UKBB | rs17884869 | A | G | -0.0100 | 0.0007 | -0.159 | 0.082 |
| Calcium_UKBB | Longevity_90%_UKBB | rs1801282  | G | C | -0.0030 | 0.0004 | -0.049 | 0.040 |
| Calcium_UKBB | Longevity_90%_UKBB | rs1858800  | T | C | 0.0030  | 0.0002 | -0.007 | 0.028 |
| Calcium_UKBB | Longevity_90%_UKBB | rs2001884  | A | T | -0.0020 | 0.0002 | 0.042  | 0.026 |
| Calcium_UKBB | Longevity_90%_UKBB | rs2004315  | T | C | 0.0030  | 0.0002 | -0.005 | 0.027 |
| Calcium_UKBB | Longevity_90%_UKBB | rs2249825  | C | G | -0.0010 | 0.0003 | 0.003  | 0.030 |
| Calcium_UKBB | Longevity_90%_UKBB | rs2274224  | C | G | -0.0020 | 0.0002 | 0.082  | 0.026 |
| Calcium_UKBB | Longevity_90%_UKBB | rs2309233  | C | T | 0.0020  | 0.0003 | -0.054 | 0.030 |
| Calcium_UKBB | Longevity_90%_UKBB | rs2327774  | C | T | -0.0020 | 0.0002 | 0.015  | 0.027 |
| Calcium_UKBB | Longevity_90%_UKBB | rs2335534  | A | G | -0.0040 | 0.0003 | -0.004 | 0.034 |
| Calcium_UKBB | Longevity_90%_UKBB | rs2343592  | G | A | -0.0020 | 0.0003 | -0.009 | 0.029 |
| Calcium_UKBB | Longevity_90%_UKBB | rs2370218  | T | G | -0.0020 | 0.0003 | 0.004  | 0.031 |
| Calcium_UKBB | Longevity_90%_UKBB | rs2395158  | G | A | -0.0020 | 0.0003 | 0.045  | 0.035 |
| Calcium_UKBB | Longevity_90%_UKBB | rs2419886  | T | C | -0.0020 | 0.0003 | -0.094 | 0.030 |
| Calcium_UKBB | Longevity_90%_UKBB | rs257380   | A | T | -0.0020 | 0.0002 | 0.018  | 0.026 |
| Calcium_UKBB | Longevity_90%_UKBB | rs2647242  | G | A | -0.0020 | 0.0003 | 0.041  | 0.033 |
| Calcium_UKBB | Longevity_90%_UKBB | rs2762938  | A | G | 0.0010  | 0.0002 | 0.003  | 0.027 |
| Calcium_UKBB | Longevity_90%_UKBB | rs28520334 | T | G | 0.0020  | 0.0004 | -0.006 | 0.040 |
| Calcium_UKBB | Longevity_90%_UKBB | rs28929474 | T | C | 0.0110  | 0.0008 | -0.030 | 0.093 |
| Calcium_UKBB | Longevity_90%_UKBB | rs2930191  | A | G | -0.0020 | 0.0002 | 0.028  | 0.027 |
| Calcium_UKBB | Longevity_90%_UKBB | rs3011642  | T | C | 0.0020  | 0.0003 | -0.005 | 0.030 |
| Calcium_UKBB | Longevity_90%_UKBB | rs3026445  | C | T | -0.0020 | 0.0002 | 0.012  | 0.027 |
| Calcium_UKBB | Longevity_90%_UKBB | rs302650   | A | G | -0.0020 | 0.0002 | 0.015  | 0.026 |
| Calcium_UKBB | Longevity_90%_UKBB | rs3091842  | A | G | 0.0090  | 0.0006 | -0.022 | 0.066 |
| Calcium_UKBB | Longevity_90%_UKBB | rs3133548  | T | C | 0.0020  | 0.0003 | 0.036  | 0.038 |
| Calcium_UKBB | Longevity_90%_UKBB | rs34290411 | G | C | 0.0020  | 0.0003 | -0.005 | 0.029 |
| Calcium_UKBB | Longevity_90%_UKBB | rs35118755 | T | C | 0.0020  | 0.0003 | 0.020  | 0.037 |
| Calcium_UKBB | Longevity_90%_UKBB | rs35320690 | C | T | 0.0020  | 0.0003 | 0.052  | 0.029 |
| Calcium_UKBB | Longevity_90%_UKBB | rs35590487 | T | C | -0.0020 | 0.0003 | -0.021 | 0.031 |
| Calcium_UKBB | Longevity_90%_UKBB | rs35751693 | T | C | 0.0040  | 0.0006 | -0.074 | 0.069 |

|              |                    |            |   |   |         |        |        |       |
|--------------|--------------------|------------|---|---|---------|--------|--------|-------|
| Calcium_UKBB | Longevity_90%_UKBB | rs35852840 | A | C | 0.0030  | 0.0005 | 0.061  | 0.056 |
| Calcium_UKBB | Longevity_90%_UKBB | rs36032443 | C | A | -0.0020 | 0.0002 | -0.014 | 0.027 |
| Calcium_UKBB | Longevity_90%_UKBB | rs36086195 | T | C | 0.0020  | 0.0002 | 0.012  | 0.027 |
| Calcium_UKBB | Longevity_90%_UKBB | rs36104352 | C | A | 0.0030  | 0.0004 | -0.010 | 0.040 |
| Calcium_UKBB | Longevity_90%_UKBB | rs3748861  | A | C | -0.0020 | 0.0003 | -0.038 | 0.033 |
| Calcium_UKBB | Longevity_90%_UKBB | rs3794695  | T | C | 0.0020  | 0.0003 | -0.055 | 0.033 |
| Calcium_UKBB | Longevity_90%_UKBB | rs3795243  | C | G | 0.0020  | 0.0004 | -0.020 | 0.039 |
| Calcium_UKBB | Longevity_90%_UKBB | rs3822858  | C | T | -0.0020 | 0.0002 | -0.005 | 0.027 |
| Calcium_UKBB | Longevity_90%_UKBB | rs3931841  | G | A | -0.0020 | 0.0003 | 0.040  | 0.028 |
| Calcium_UKBB | Longevity_90%_UKBB | rs4082330  | T | C | 0.0020  | 0.0003 | -0.017 | 0.034 |
| Calcium_UKBB | Longevity_90%_UKBB | rs41278174 | A | G | 0.0050  | 0.0007 | -0.023 | 0.080 |
| Calcium_UKBB | Longevity_90%_UKBB | rs4239142  | G | A | -0.0020 | 0.0003 | -0.026 | 0.030 |
| Calcium_UKBB | Longevity_90%_UKBB | rs424062   | G | A | -0.0020 | 0.0004 | 0.056  | 0.037 |
| Calcium_UKBB | Longevity_90%_UKBB | rs4324076  | C | A | -0.0020 | 0.0002 | 0.000  | 0.026 |
| Calcium_UKBB | Longevity_90%_UKBB | rs4633480  | A | G | 0.0020  | 0.0002 | -0.011 | 0.026 |
| Calcium_UKBB | Longevity_90%_UKBB | rs4653767  | C | T | -0.0020 | 0.0003 | 0.003  | 0.029 |
| Calcium_UKBB | Longevity_90%_UKBB | rs4721467  | T | A | -0.0020 | 0.0003 | -0.043 | 0.030 |
| Calcium_UKBB | Longevity_90%_UKBB | rs4758621  | G | A | -0.0020 | 0.0003 | 0.054  | 0.028 |
| Calcium_UKBB | Longevity_90%_UKBB | rs4790310  | T | C | -0.0020 | 0.0002 | 0.026  | 0.027 |
| Calcium_UKBB | Longevity_90%_UKBB | rs4841132  | G | A | 0.0050  | 0.0004 | -0.058 | 0.045 |
| Calcium_UKBB | Longevity_90%_UKBB | rs4935009  | C | A | -0.0020 | 0.0003 | 0.016  | 0.039 |
| Calcium_UKBB | Longevity_90%_UKBB | rs4938642  | C | G | 0.0030  | 0.0004 | 0.050  | 0.050 |
| Calcium_UKBB | Longevity_90%_UKBB | rs498490   | T | C | -0.0030 | 0.0003 | -0.011 | 0.035 |
| Calcium_UKBB | Longevity_90%_UKBB | rs55772024 | A | G | -0.0020 | 0.0003 | 0.035  | 0.030 |
| Calcium_UKBB | Longevity_90%_UKBB | rs56406311 | T | C | 0.0020  | 0.0002 | 0.018  | 0.027 |
| Calcium_UKBB | Longevity_90%_UKBB | rs5751350  | A | G | 0.0020  | 0.0002 | -0.003 | 0.028 |
| Calcium_UKBB | Longevity_90%_UKBB | rs5760495  | T | C | 0.0010  | 0.0002 | -0.018 | 0.028 |
| Calcium_UKBB | Longevity_90%_UKBB | rs59821684 | G | A | 0.0050  | 0.0007 | 0.000  | 0.078 |
| Calcium_UKBB | Longevity_90%_UKBB | rs60616569 | A | G | -0.0020 | 0.0003 | -0.039 | 0.031 |
| Calcium_UKBB | Longevity_90%_UKBB | rs6127099  | T | A | -0.0050 | 0.0003 | 0.044  | 0.030 |
| Calcium_UKBB | Longevity_90%_UKBB | rs62071306 | C | A | -0.0020 | 0.0003 | -0.047 | 0.030 |
| Calcium_UKBB | Longevity_90%_UKBB | rs62134679 | C | T | 0.0020  | 0.0003 | 0.011  | 0.037 |
| Calcium_UKBB | Longevity_90%_UKBB | rs62211622 | A | C | -0.0020 | 0.0003 | -0.010 | 0.034 |
| Calcium_UKBB | Longevity_90%_UKBB | rs62268807 | A | T | -0.0020 | 0.0003 | 0.014  | 0.031 |



|              |                    |            |   |   |         |        |        |       |
|--------------|--------------------|------------|---|---|---------|--------|--------|-------|
| Calcium_UKBB | Longevity_90%_UKBB | rs62309863 | T | G | -0.0010 | 0.0002 | 0.039  | 0.027 |
| Calcium_UKBB | Longevity_90%_UKBB | rs62472728 | T | C | 0.0030  | 0.0005 | -0.057 | 0.055 |
| Calcium_UKBB | Longevity_90%_UKBB | rs634916   | T | A | -0.0010 | 0.0002 | 0.069  | 0.026 |
| Calcium_UKBB | Longevity_90%_UKBB | rs6580981  | A | G | -0.0020 | 0.0002 | 0.021  | 0.026 |
| Calcium_UKBB | Longevity_90%_UKBB | rs66920316 | A | G | -0.0020 | 0.0003 | -0.010 | 0.033 |
| Calcium_UKBB | Longevity_90%_UKBB | rs6698689  | A | G | -0.0030 | 0.0004 | 0.015  | 0.040 |
| Calcium_UKBB | Longevity_90%_UKBB | rs6741561  | T | C | -0.0030 | 0.0002 | 0.014  | 0.027 |
| Calcium_UKBB | Longevity_90%_UKBB | rs6841429  | A | C | -0.0040 | 0.0003 | -0.023 | 0.035 |
| Calcium_UKBB | Longevity_90%_UKBB | rs7003580  | T | C | 0.0010  | 0.0002 | 0.038  | 0.027 |
| Calcium_UKBB | Longevity_90%_UKBB | rs710217   | G | A | 0.0020  | 0.0002 | -0.041 | 0.026 |
| Calcium_UKBB | Longevity_90%_UKBB | rs71565393 | T | C | 0.0020  | 0.0003 | -0.036 | 0.034 |
| Calcium_UKBB | Longevity_90%_UKBB | rs71658797 | A | T | 0.0020  | 0.0004 | -0.021 | 0.040 |
| Calcium_UKBB | Longevity_90%_UKBB | rs7221118  | C | T | -0.0020 | 0.0003 | -0.046 | 0.032 |
| Calcium_UKBB | Longevity_90%_UKBB | rs72697816 | T | C | 0.0020  | 0.0003 | -0.007 | 0.035 |
| Calcium_UKBB | Longevity_90%_UKBB | rs73632745 | T | C | -0.0050 | 0.0004 | 0.042  | 0.050 |
| Calcium_UKBB | Longevity_90%_UKBB | rs7370877  | G | A | -0.0020 | 0.0002 | -0.047 | 0.027 |
| Calcium_UKBB | Longevity_90%_UKBB | rs7402977  | A | G | -0.0010 | 0.0003 | -0.013 | 0.030 |
| Calcium_UKBB | Longevity_90%_UKBB | rs74230087 | A | G | -0.0050 | 0.0004 | -0.026 | 0.049 |
| Calcium_UKBB | Longevity_90%_UKBB | rs75448233 | T | C | 0.0030  | 0.0005 | -0.079 | 0.059 |
| Calcium_UKBB | Longevity_90%_UKBB | rs7546838  | G | A | 0.0020  | 0.0002 | -0.067 | 0.028 |
| Calcium_UKBB | Longevity_90%_UKBB | rs7559013  | C | A | 0.0020  | 0.0003 | -0.069 | 0.039 |
| Calcium_UKBB | Longevity_90%_UKBB | rs75702986 | A | G | 0.0030  | 0.0003 | -0.029 | 0.034 |
| Calcium_UKBB | Longevity_90%_UKBB | rs7587636  | A | G | -0.0020 | 0.0002 | 0.007  | 0.026 |
| Calcium_UKBB | Longevity_90%_UKBB | rs75895430 | G | C | 0.0070  | 0.0007 | -0.099 | 0.075 |
| Calcium_UKBB | Longevity_90%_UKBB | rs7592216  | T | G | -0.0020 | 0.0003 | 0.042  | 0.039 |
| Calcium_UKBB | Longevity_90%_UKBB | rs7599     | G | A | -0.0020 | 0.0002 | -0.046 | 0.027 |
| Calcium_UKBB | Longevity_90%_UKBB | rs76947531 | C | T | -0.0080 | 0.0004 | 0.055  | 0.042 |
| Calcium_UKBB | Longevity_90%_UKBB | rs7730344  | A | C | 0.0020  | 0.0003 | -0.011 | 0.029 |
| Calcium_UKBB | Longevity_90%_UKBB | rs775249   | T | C | -0.0010 | 0.0003 | 0.015  | 0.029 |
| Calcium_UKBB | Longevity_90%_UKBB | rs77542162 | G | A | -0.0080 | 0.0008 | -0.150 | 0.086 |
| Calcium_UKBB | Longevity_90%_UKBB | rs77704893 | C | T | 0.0040  | 0.0005 | 0.054  | 0.050 |
| Calcium_UKBB | Longevity_90%_UKBB | rs777588   | A | G | -0.0030 | 0.0002 | 0.065  | 0.026 |
| Calcium_UKBB | Longevity_90%_UKBB | rs7786368  | C | T | -0.0020 | 0.0002 | 0.040  | 0.026 |
| Calcium_UKBB | Longevity_90%_UKBB | rs79501693 | C | T | -0.0050 | 0.0008 | 0.050  | 0.092 |

|              |                    |            |   |   |         |        |        |       |
|--------------|--------------------|------------|---|---|---------|--------|--------|-------|
| Calcium_UKBB | Longevity_90%_UKBB | rs80350997 | A | G | 0.0040  | 0.0004 | 0.018  | 0.049 |
| Calcium_UKBB | Longevity_90%_UKBB | rs8054061  | C | T | 0.0020  | 0.0002 | -0.042 | 0.026 |
| Calcium_UKBB | Longevity_90%_UKBB | rs883951   | G | A | 0.0020  | 0.0003 | 0.028  | 0.030 |
| Calcium_UKBB | Longevity_90%_UKBB | rs928760   | T | C | -0.0020 | 0.0003 | -0.031 | 0.028 |
| Calcium_UKBB | Longevity_90%_UKBB | rs9379881  | C | T | -0.0010 | 0.0002 | 0.029  | 0.026 |
| Calcium_UKBB | Longevity_90%_UKBB | rs9388399  | C | T | -0.0020 | 0.0003 | 0.035  | 0.028 |
| Calcium_UKBB | Longevity_90%_UKBB | rs9399697  | T | C | 0.0010  | 0.0002 | 0.001  | 0.026 |
| Calcium_UKBB | Longevity_90%_UKBB | rs9419741  | G | A | 0.0010  | 0.0002 | -0.033 | 0.026 |
| Calcium_UKBB | Longevity_90%_UKBB | rs9447004  | G | A | -0.0040 | 0.0002 | 0.031  | 0.026 |
| Calcium_UKBB | Longevity_90%_UKBB | rs945890   | T | A | -0.0020 | 0.0003 | -0.006 | 0.029 |
| Calcium_UKBB | Longevity_90%_UKBB | rs948737   | T | C | -0.0010 | 0.0002 | 0.041  | 0.028 |
| Calcium_UKBB | Longevity_90%_UKBB | rs949300   | A | T | 0.0010  | 0.0002 | 0.018  | 0.027 |
| Calcium_UKBB | Longevity_90%_UKBB | rs9530     | G | A | -0.0030 | 0.0002 | 0.019  | 0.026 |
| Calcium_UKBB | Longevity_90%_UKBB | rs9532958  | A | G | 0.0030  | 0.0003 | 0.050  | 0.037 |

EA, effect allele; NEA, non-effect allele; SNP, single nucleotide polymorphism.

**Supplementary Table 7.** Data for analyses of serum 25(OH)D

| Exposure                    | Outcome            | SNP         | EA | NEA | Exposure_beta | Exposure_se | Outcome_beta | Outcome_se |
|-----------------------------|--------------------|-------------|----|-----|---------------|-------------|--------------|------------|
| 25(OH)D_Jiang_X_Manousaki_D | FinnGen_CA         | rs10741657  | A  | G   | 0.090         | 0.007       | 0.004        | 0.009      |
| 25(OH)D_Jiang_X_Manousaki_D | FinnGen_CA         | rs10745742  | T  | C   | 0.050         | 0.007       | -0.001       | 0.009      |
| 25(OH)D_Jiang_X_Manousaki_D | FinnGen_CA         | rs117913124 | G  | A   | 0.430         | 0.020       | 0.039        | 0.032      |
| 25(OH)D_Jiang_X_Manousaki_D | FinnGen_CA         | rs12785878  | T  | G   | 0.110         | 0.007       | 0.006        | 0.009      |
| 25(OH)D_Jiang_X_Manousaki_D | FinnGen_CA         | rs17216707  | T  | C   | 0.080         | 0.008       | 0.003        | 0.011      |
| 25(OH)D_Jiang_X_Manousaki_D | FinnGen_CA         | rs3755967   | C  | T   | 0.270         | 0.007       | -0.009       | 0.011      |
| 25(OH)D_Jiang_X_Manousaki_D | FinnGen_CA         | rs8018720   | G  | C   | 0.050         | 0.009       | -0.001       | 0.012      |
| 25(OH)D_Jiang_X_Manousaki_D | FinnGen_CVD        | rs10741657  | A  | G   | 0.0900        | 0.0070      | 0.008        | 0.008      |
| 25(OH)D_Jiang_X_Manousaki_D | FinnGen_CVD        | rs10745742  | T  | C   | 0.0500        | 0.0070      | 0.005        | 0.008      |
| 25(OH)D_Jiang_X_Manousaki_D | FinnGen_CVD        | rs117913124 | G  | A   | 0.4300        | 0.0200      | 0.005        | 0.028      |
| 25(OH)D_Jiang_X_Manousaki_D | FinnGen_CVD        | rs12785878  | T  | G   | 0.1100        | 0.0070      | -0.007       | 0.008      |
| 25(OH)D_Jiang_X_Manousaki_D | FinnGen_CVD        | rs17216707  | T  | C   | 0.0800        | 0.0080      | 0.011        | 0.010      |
| 25(OH)D_Jiang_X_Manousaki_D | FinnGen_CVD        | rs3755967   | C  | T   | 0.2700        | 0.0070      | 0.009        | 0.010      |
| 25(OH)D_Jiang_X_Manousaki_D | FinnGen_CVD        | rs8018720   | G  | C   | 0.0500        | 0.0090      | 0.000        | 0.011      |
| 25(OH)D_Jiang_X_Manousaki_D | Longevity_90%      | rs3755967   | C  | T   | 0.270         | 0.007       | -0.011       | 0.021      |
| 25(OH)D_Jiang_X_Manousaki_D | Longevity_90%      | rs117913124 | G  | A   | 0.430         | 0.020       | -0.042       | 0.078      |
| 25(OH)D_Jiang_X_Manousaki_D | Longevity_90%      | rs10741657  | A  | G   | 0.090         | 0.007       | -0.009       | 0.020      |
| 25(OH)D_Jiang_X_Manousaki_D | Longevity_90%      | rs12785878  | T  | G   | 0.110         | 0.007       | -0.033       | 0.021      |
| 25(OH)D_Jiang_X_Manousaki_D | Longevity_90%      | rs10745742  | T  | C   | 0.050         | 0.007       | 0.015        | 0.020      |
| 25(OH)D_Jiang_X_Manousaki_D | Longevity_90%      | rs8018720   | G  | C   | 0.050         | 0.009       | -0.032       | 0.025      |
| 25(OH)D_Jiang_X_Manousaki_D | Longevity_90%      | rs17216707  | T  | C   | 0.080         | 0.008       | 0.012        | 0.026      |
| 25(OH)D_Jiang_X_Manousaki_D | Longevity_90%_UKBB | rs10741657  | A  | G   | 0.090         | 0.007       | 0.008        | 0.027      |
| 25(OH)D_Jiang_X_Manousaki_D | Longevity_90%_UKBB | rs10745742  | T  | C   | 0.050         | 0.007       | 0.095        | 0.027      |
| 25(OH)D_Jiang_X_Manousaki_D | Longevity_90%_UKBB | rs117913124 | G  | A   | 0.430         | 0.020       | -0.117       | 0.080      |
| 25(OH)D_Jiang_X_Manousaki_D | Longevity_90%_UKBB | rs12785878  | T  | G   | 0.110         | 0.007       | -0.024       | 0.032      |
| 25(OH)D_Jiang_X_Manousaki_D | Longevity_90%_UKBB | rs17216707  | T  | C   | 0.080         | 0.008       | -0.041       | 0.034      |
| 25(OH)D_Jiang_X_Manousaki_D | Longevity_90%_UKBB | rs3755967   | C  | T   | 0.270         | 0.007       | -0.055       | 0.029      |
| 25(OH)D_Jiang_X_Manousaki_D | Longevity_90%_UKBB | rs8018720   | G  | C   | 0.050         | 0.009       | -0.042       | 0.034      |

|              |            |             |   |    |        |       |        |       |
|--------------|------------|-------------|---|----|--------|-------|--------|-------|
| 25(OH)D_UKBB | FinnGen_CA | rs10070734  | T | C  | -0.013 | 0.002 | 0.004  | 0.010 |
| 25(OH)D_UKBB | FinnGen_CA | rs10085881  | T | C  | 0.015  | 0.002 | 0.001  | 0.010 |
| 25(OH)D_UKBB | FinnGen_CA | rs1038165   | C | T  | -0.012 | 0.002 | 0.008  | 0.009 |
| 25(OH)D_UKBB | FinnGen_CA | rs10426     | G | A  | -0.025 | 0.002 | -0.001 | 0.010 |
| 25(OH)D_UKBB | FinnGen_CA | rs10454087  | C | T  | 0.014  | 0.002 | -0.005 | 0.010 |
| 25(OH)D_UKBB | FinnGen_CA | rs1047891   | C | A  | 0.015  | 0.002 | -0.005 | 0.010 |
| 25(OH)D_UKBB | FinnGen_CA | rs10859995  | T | C  | 0.044  | 0.002 | -0.006 | 0.009 |
| 25(OH)D_UKBB | FinnGen_CA | rs10887718  | C | T  | 0.011  | 0.002 | 0.007  | 0.009 |
| 25(OH)D_UKBB | FinnGen_CA | rs10908419  | G | A  | 0.012  | 0.002 | 0.013  | 0.009 |
| 25(OH)D_UKBB | FinnGen_CA | rs10908465  | C | T  | -0.020 | 0.002 | 0.005  | 0.010 |
| 25(OH)D_UKBB | FinnGen_CA | rs11076175  | A | G  | -0.018 | 0.003 | 0.009  | 0.012 |
| 25(OH)D_UKBB | FinnGen_CA | rs11108368  | A | G  | -0.014 | 0.002 | -0.002 | 0.009 |
| 25(OH)D_UKBB | FinnGen_CA | rs11127186  | T | C  | -0.011 | 0.002 | -0.012 | 0.009 |
| 25(OH)D_UKBB | FinnGen_CA | rs11182428  | T | C  | 0.013  | 0.002 | -0.007 | 0.009 |
| 25(OH)D_UKBB | FinnGen_CA | rs11264322  | G | A  | 0.013  | 0.002 | 0.007  | 0.009 |
| 25(OH)D_UKBB | FinnGen_CA | rs11458206  | T | TG | -0.014 | 0.002 | 0.003  | 0.010 |
| 25(OH)D_UKBB | FinnGen_CA | rs1149605   | T | C  | -0.023 | 0.003 | 0.017  | 0.012 |
| 25(OH)D_UKBB | FinnGen_CA | rs11542462  | G | A  | 0.024  | 0.003 | 0.018  | 0.015 |
| 25(OH)D_UKBB | FinnGen_CA | rs115621755 | C | T  | 0.012  | 0.002 | 0.007  | 0.009 |
| 25(OH)D_UKBB | FinnGen_CA | rs11591147  | G | T  | -0.045 | 0.007 | -0.001 | 0.024 |
| 25(OH)D_UKBB | FinnGen_CA | rs11606     | C | G  | -0.012 | 0.002 | -0.007 | 0.009 |
| 25(OH)D_UKBB | FinnGen_CA | rs116970203 | G | A  | 0.428  | 0.006 | 0.043  | 0.032 |
| 25(OH)D_UKBB | FinnGen_CA | rs11732896  | G | A  | 0.016  | 0.002 | 0.004  | 0.010 |
| 25(OH)D_UKBB | FinnGen_CA | rs117576073 | G | T  | 0.215  | 0.009 | 0.011  | 0.028 |
| 25(OH)D_UKBB | FinnGen_CA | rs12056768  | T | G  | 0.025  | 0.002 | -0.009 | 0.009 |
| 25(OH)D_UKBB | FinnGen_CA | rs12123821  | C | T  | -0.074 | 0.005 | -0.055 | 0.023 |
| 25(OH)D_UKBB | FinnGen_CA | rs1229984   | T | C  | 0.047  | 0.006 | -0.102 | 0.060 |
| 25(OH)D_UKBB | FinnGen_CA | rs12317268  | A | G  | 0.021  | 0.003 | -0.021 | 0.010 |
| 25(OH)D_UKBB | FinnGen_CA | rs12372115  | G | T  | 0.022  | 0.004 | -0.006 | 0.020 |
| 25(OH)D_UKBB | FinnGen_CA | rs1260326   | T | C  | -0.021 | 0.002 | 0.003  | 0.009 |
| 25(OH)D_UKBB | FinnGen_CA | rs12794714  | G | A  | 0.113  | 0.002 | -0.013 | 0.009 |

|              |            |             |   |   |        |       |        |       |
|--------------|------------|-------------|---|---|--------|-------|--------|-------|
| 25(OH)D_UKBB | FinnGen_CA | rs12798050  | C | T | -0.048 | 0.004 | -0.010 | 0.010 |
| 25(OH)D_UKBB | FinnGen_CA | rs12803256  | A | G | -0.067 | 0.004 | -0.007 | 0.009 |
| 25(OH)D_UKBB | FinnGen_CA | rs12881545  | G | C | -0.012 | 0.002 | 0.017  | 0.009 |
| 25(OH)D_UKBB | FinnGen_CA | rs13060130  | C | T | 0.017  | 0.003 | 0.005  | 0.012 |
| 25(OH)D_UKBB | FinnGen_CA | rs13104260  | G | A | -0.020 | 0.002 | 0.009  | 0.011 |
| 25(OH)D_UKBB | FinnGen_CA | rs13284054  | T | C | -0.018 | 0.003 | -0.018 | 0.014 |
| 25(OH)D_UKBB | FinnGen_CA | rs1352846   | A | G | 0.196  | 0.002 | -0.016 | 0.011 |
| 25(OH)D_UKBB | FinnGen_CA | rs140371183 | A | G | -0.063 | 0.007 | 0.000  | 0.050 |
| 25(OH)D_UKBB | FinnGen_CA | rs142158911 | G | A | -0.025 | 0.003 | -0.017 | 0.015 |
| 25(OH)D_UKBB | FinnGen_CA | rs1660839   | G | A | -0.015 | 0.002 | 0.003  | 0.011 |
| 25(OH)D_UKBB | FinnGen_CA | rs17216707  | T | C | 0.032  | 0.003 | 0.003  | 0.011 |
| 25(OH)D_UKBB | FinnGen_CA | rs17231506  | C | T | 0.014  | 0.002 | -0.001 | 0.010 |
| 25(OH)D_UKBB | FinnGen_CA | rs1800588   | C | T | 0.034  | 0.002 | 0.017  | 0.010 |
| 25(OH)D_UKBB | FinnGen_CA | rs187429064 | A | G | -0.068 | 0.009 | -0.042 | 0.021 |
| 25(OH)D_UKBB | FinnGen_CA | rs1933064   | G | A | -0.015 | 0.002 | -0.017 | 0.009 |
| 25(OH)D_UKBB | FinnGen_CA | rs2012736   | C | A | 0.048  | 0.004 | -0.031 | 0.017 |
| 25(OH)D_UKBB | FinnGen_CA | rs2037511   | G | A | -0.018 | 0.003 | -0.006 | 0.012 |
| 25(OH)D_UKBB | FinnGen_CA | rs2074735   | G | C | -0.028 | 0.004 | 0.003  | 0.013 |
| 25(OH)D_UKBB | FinnGen_CA | rs212100    | T | C | 0.066  | 0.003 | -0.001 | 0.012 |
| 25(OH)D_UKBB | FinnGen_CA | rs2131925   | G | T | 0.023  | 0.002 | 0.001  | 0.010 |
| 25(OH)D_UKBB | FinnGen_CA | rs2207132   | G | A | 0.035  | 0.006 | -0.009 | 0.018 |
| 25(OH)D_UKBB | FinnGen_CA | rs2229742   | G | C | 0.025  | 0.003 | -0.019 | 0.014 |
| 25(OH)D_UKBB | FinnGen_CA | rs2248551   | G | A | 0.023  | 0.003 | -0.009 | 0.011 |
| 25(OH)D_UKBB | FinnGen_CA | rs2346264   | A | C | 0.014  | 0.002 | -0.020 | 0.012 |
| 25(OH)D_UKBB | FinnGen_CA | rs2585442   | C | G | -0.027 | 0.002 | 0.000  | 0.010 |
| 25(OH)D_UKBB | FinnGen_CA | rs261291    | T | C | 0.028  | 0.002 | -0.021 | 0.009 |
| 25(OH)D_UKBB | FinnGen_CA | rs2710651   | G | A | 0.011  | 0.002 | -0.012 | 0.009 |
| 25(OH)D_UKBB | FinnGen_CA | rs2725371   | A | G | -0.012 | 0.002 | -0.002 | 0.010 |
| 25(OH)D_UKBB | FinnGen_CA | rs2762943   | T | G | -0.045 | 0.004 | -0.010 | 0.015 |
| 25(OH)D_UKBB | FinnGen_CA | rs28364331  | A | G | -0.070 | 0.007 | 0.014  | 0.081 |
| 25(OH)D_UKBB | FinnGen_CA | rs28367476  | A | G | 0.014  | 0.002 | -0.024 | 0.009 |

|              |            |            |   |   |        |       |        |       |
|--------------|------------|------------|---|---|--------|-------|--------|-------|
| 25(OH)D_UKBB | FinnGen_CA | rs28374650 | C | T | 0.013  | 0.002 | 0.001  | 0.011 |
| 25(OH)D_UKBB | FinnGen_CA | rs2847500  | G | A | 0.022  | 0.003 | 0.006  | 0.013 |
| 25(OH)D_UKBB | FinnGen_CA | rs28692966 | G | A | -0.015 | 0.002 | -0.012 | 0.010 |
| 25(OH)D_UKBB | FinnGen_CA | rs2952289  | C | T | -0.018 | 0.002 | -0.016 | 0.012 |
| 25(OH)D_UKBB | FinnGen_CA | rs31612    | T | C | 0.015  | 0.003 | 0.009  | 0.011 |
| 25(OH)D_UKBB | FinnGen_CA | rs325384   | C | T | 0.014  | 0.002 | -0.003 | 0.010 |
| 25(OH)D_UKBB | FinnGen_CA | rs34290760 | C | G | 0.039  | 0.006 | 0.007  | 0.019 |
| 25(OH)D_UKBB | FinnGen_CA | rs35057908 | A | T | -0.016 | 0.002 | -0.002 | 0.010 |
| 25(OH)D_UKBB | FinnGen_CA | rs35408430 | C | T | 0.021  | 0.002 | 0.005  | 0.009 |
| 25(OH)D_UKBB | FinnGen_CA | rs3814995  | C | T | 0.012  | 0.002 | 0.007  | 0.009 |
| 25(OH)D_UKBB | FinnGen_CA | rs3849374  | G | C | 0.016  | 0.003 | -0.022 | 0.011 |
| 25(OH)D_UKBB | FinnGen_CA | rs4121823  | T | A | 0.019  | 0.003 | 0.022  | 0.012 |
| 25(OH)D_UKBB | FinnGen_CA | rs4327060  | C | T | 0.025  | 0.004 | -0.001 | 0.014 |
| 25(OH)D_UKBB | FinnGen_CA | rs4364259  | G | A | -0.016 | 0.003 | 0.004  | 0.011 |
| 25(OH)D_UKBB | FinnGen_CA | rs4418728  | G | T | -0.011 | 0.002 | 0.000  | 0.009 |
| 25(OH)D_UKBB | FinnGen_CA | rs4575545  | G | A | 0.016  | 0.002 | 0.000  | 0.010 |
| 25(OH)D_UKBB | FinnGen_CA | rs4616820  | C | T | 0.012  | 0.002 | -0.013 | 0.009 |
| 25(OH)D_UKBB | FinnGen_CA | rs484195   | A | G | 0.016  | 0.002 | -0.007 | 0.010 |
| 25(OH)D_UKBB | FinnGen_CA | rs541041   | G | A | 0.016  | 0.003 | 0.010  | 0.011 |
| 25(OH)D_UKBB | FinnGen_CA | rs55829990 | T | C | 0.019  | 0.002 | 0.000  | 0.009 |
| 25(OH)D_UKBB | FinnGen_CA | rs590215   | C | T | 0.013  | 0.002 | -0.006 | 0.011 |
| 25(OH)D_UKBB | FinnGen_CA | rs6003456  | T | A | 0.013  | 0.002 | -0.010 | 0.012 |
| 25(OH)D_UKBB | FinnGen_CA | rs6123359  | A | G | -0.025 | 0.003 | 0.027  | 0.014 |
| 25(OH)D_UKBB | FinnGen_CA | rs613808   | A | G | -0.016 | 0.002 | -0.008 | 0.009 |
| 25(OH)D_UKBB | FinnGen_CA | rs61816761 | G | A | -0.077 | 0.010 | -0.043 | 0.085 |
| 25(OH)D_UKBB | FinnGen_CA | rs61883501 | A | C | -0.033 | 0.006 | 0.010  | 0.034 |
| 25(OH)D_UKBB | FinnGen_CA | rs61891388 | T | G | -0.013 | 0.002 | 0.017  | 0.009 |
| 25(OH)D_UKBB | FinnGen_CA | rs62007299 | G | A | 0.013  | 0.002 | 0.005  | 0.010 |
| 25(OH)D_UKBB | FinnGen_CA | rs6671730  | G | A | 0.015  | 0.002 | 0.015  | 0.009 |
| 25(OH)D_UKBB | FinnGen_CA | rs6672758  | C | T | -0.017 | 0.003 | 0.007  | 0.010 |
| 25(OH)D_UKBB | FinnGen_CA | rs6782190  | G | A | 0.018  | 0.002 | -0.012 | 0.010 |

|              |             |            |   |   |        |       |        |       |
|--------------|-------------|------------|---|---|--------|-------|--------|-------|
| 25(OH)D_UKBB | FinnGen_CA  | rs705117   | C | T | -0.032 | 0.003 | -0.016 | 0.013 |
| 25(OH)D_UKBB | FinnGen_CA  | rs7149014  | T | C | 0.013  | 0.002 | 0.000  | 0.009 |
| 25(OH)D_UKBB | FinnGen_CA  | rs727857   | G | A | 0.014  | 0.002 | 0.000  | 0.009 |
| 25(OH)D_UKBB | FinnGen_CA  | rs72834856 | T | G | 0.025  | 0.004 | -0.024 | 0.018 |
| 25(OH)D_UKBB | FinnGen_CA  | rs72997623 | C | A | -0.028 | 0.004 | 0.002  | 0.016 |
| 25(OH)D_UKBB | FinnGen_CA  | rs73413596 | T | C | -0.022 | 0.004 | 0.001  | 0.019 |
| 25(OH)D_UKBB | FinnGen_CA  | rs7412     | C | T | -0.030 | 0.004 | -0.017 | 0.020 |
| 25(OH)D_UKBB | FinnGen_CA  | rs7522116  | C | T | 0.013  | 0.002 | -0.010 | 0.009 |
| 25(OH)D_UKBB | FinnGen_CA  | rs7528419  | A | G | -0.020 | 0.002 | 0.000  | 0.011 |
| 25(OH)D_UKBB | FinnGen_CA  | rs7569755  | G | A | -0.014 | 0.002 | -0.012 | 0.011 |
| 25(OH)D_UKBB | FinnGen_CA  | rs75741381 | C | G | 0.016  | 0.003 | -0.006 | 0.012 |
| 25(OH)D_UKBB | FinnGen_CA  | rs7604788  | C | T | -0.036 | 0.006 | 0.028  | 0.019 |
| 25(OH)D_UKBB | FinnGen_CA  | rs76798800 | G | T | 0.017  | 0.002 | -0.012 | 0.011 |
| 25(OH)D_UKBB | FinnGen_CA  | rs77532868 | C | T | -0.027 | 0.004 | 0.017  | 0.025 |
| 25(OH)D_UKBB | FinnGen_CA  | rs77924615 | G | A | 0.017  | 0.003 | 0.008  | 0.011 |
| 25(OH)D_UKBB | FinnGen_CA  | rs78151190 | A | C | 0.017  | 0.003 | -0.013 | 0.015 |
| 25(OH)D_UKBB | FinnGen_CA  | rs78168201 | C | T | -0.066 | 0.009 | -0.031 | 0.066 |
| 25(OH)D_UKBB | FinnGen_CA  | rs78649910 | T | A | 0.021  | 0.003 | 0.000  | 0.014 |
| 25(OH)D_UKBB | FinnGen_CA  | rs8018720  | G | C | 0.038  | 0.003 | -0.001 | 0.012 |
| 25(OH)D_UKBB | FinnGen_CA  | rs804281   | A | G | -0.015 | 0.002 | 0.003  | 0.013 |
| 25(OH)D_UKBB | FinnGen_CA  | rs8091117  | C | A | 0.026  | 0.004 | 0.009  | 0.017 |
| 25(OH)D_UKBB | FinnGen_CA  | rs8113404  | C | T | -0.013 | 0.002 | -0.001 | 0.010 |
| 25(OH)D_UKBB | FinnGen_CA  | rs867772   | A | G | 0.014  | 0.002 | 0.008  | 0.010 |
| 25(OH)D_UKBB | FinnGen_CA  | rs9476310  | C | T | -0.012 | 0.002 | 0.013  | 0.009 |
| 25(OH)D_UKBB | FinnGen_CA  | rs9490317  | T | C | -0.011 | 0.002 | -0.001 | 0.009 |
| 25(OH)D_UKBB | FinnGen_CA  | rs964184   | G | C | -0.035 | 0.003 | -0.005 | 0.013 |
| 25(OH)D_UKBB | FinnGen_CA  | rs9861009  | T | C | -0.014 | 0.002 | -0.005 | 0.010 |
| 25(OH)D_UKBB | FinnGen_CVD | rs10070734 | T | C | -0.013 | 0.002 | 0.001  | 0.009 |
| 25(OH)D_UKBB | FinnGen_CVD | rs10085881 | T | C | 0.015  | 0.002 | 0.007  | 0.009 |
| 25(OH)D_UKBB | FinnGen_CVD | rs1038165  | C | T | -0.012 | 0.002 | 0.001  | 0.008 |
| 25(OH)D_UKBB | FinnGen_CVD | rs10426    | G | A | -0.025 | 0.002 | 0.003  | 0.009 |

|              |             |             |   |    |        |       |        |       |
|--------------|-------------|-------------|---|----|--------|-------|--------|-------|
| 25(OH)D_UKBB | FinnGen_CVD | rs10454087  | C | T  | 0.014  | 0.002 | -0.003 | 0.009 |
| 25(OH)D_UKBB | FinnGen_CVD | rs1047891   | C | A  | 0.015  | 0.002 | 0.010  | 0.008 |
| 25(OH)D_UKBB | FinnGen_CVD | rs10859995  | T | C  | 0.044  | 0.002 | 0.013  | 0.008 |
| 25(OH)D_UKBB | FinnGen_CVD | rs10887718  | C | T  | 0.011  | 0.002 | 0.001  | 0.008 |
| 25(OH)D_UKBB | FinnGen_CVD | rs10908419  | G | A  | 0.012  | 0.002 | 0.011  | 0.008 |
| 25(OH)D_UKBB | FinnGen_CVD | rs10908465  | C | T  | -0.020 | 0.002 | 0.004  | 0.009 |
| 25(OH)D_UKBB | FinnGen_CVD | rs11076175  | A | G  | -0.018 | 0.003 | -0.009 | 0.010 |
| 25(OH)D_UKBB | FinnGen_CVD | rs11108368  | A | G  | -0.014 | 0.002 | 0.007  | 0.008 |
| 25(OH)D_UKBB | FinnGen_CVD | rs11127186  | T | C  | -0.011 | 0.002 | -0.010 | 0.008 |
| 25(OH)D_UKBB | FinnGen_CVD | rs11182428  | T | C  | 0.013  | 0.002 | -0.004 | 0.008 |
| 25(OH)D_UKBB | FinnGen_CVD | rs11264322  | G | A  | 0.013  | 0.002 | -0.001 | 0.008 |
| 25(OH)D_UKBB | FinnGen_CVD | rs11458206  | T | TG | -0.014 | 0.002 | 0.005  | 0.008 |
| 25(OH)D_UKBB | FinnGen_CVD | rs1149605   | T | C  | -0.023 | 0.003 | -0.001 | 0.010 |
| 25(OH)D_UKBB | FinnGen_CVD | rs11542462  | G | A  | 0.024  | 0.003 | 0.005  | 0.013 |
| 25(OH)D_UKBB | FinnGen_CVD | rs115621755 | C | T  | 0.012  | 0.002 | -0.020 | 0.008 |
| 25(OH)D_UKBB | FinnGen_CVD | rs11591147  | G | T  | -0.045 | 0.007 | 0.037  | 0.021 |
| 25(OH)D_UKBB | FinnGen_CVD | rs11606     | C | G  | -0.012 | 0.002 | -0.003 | 0.008 |
| 25(OH)D_UKBB | FinnGen_CVD | rs116970203 | G | A  | 0.428  | 0.006 | 0.005  | 0.028 |
| 25(OH)D_UKBB | FinnGen_CVD | rs11732896  | G | A  | 0.016  | 0.002 | -0.005 | 0.009 |
| 25(OH)D_UKBB | FinnGen_CVD | rs117576073 | G | T  | 0.215  | 0.009 | -0.018 | 0.024 |
| 25(OH)D_UKBB | FinnGen_CVD | rs12056768  | T | G  | 0.025  | 0.002 | -0.007 | 0.008 |
| 25(OH)D_UKBB | FinnGen_CVD | rs12123821  | C | T  | -0.074 | 0.005 | -0.005 | 0.020 |
| 25(OH)D_UKBB | FinnGen_CVD | rs1229984   | T | C  | 0.047  | 0.006 | -0.016 | 0.054 |
| 25(OH)D_UKBB | FinnGen_CVD | rs12317268  | A | G  | 0.021  | 0.003 | 0.017  | 0.009 |
| 25(OH)D_UKBB | FinnGen_CVD | rs12372115  | G | T  | 0.022  | 0.004 | -0.013 | 0.017 |
| 25(OH)D_UKBB | FinnGen_CVD | rs1260326   | T | C  | -0.021 | 0.002 | 0.006  | 0.008 |
| 25(OH)D_UKBB | FinnGen_CVD | rs12794714  | G | A  | 0.113  | 0.002 | 0.004  | 0.008 |
| 25(OH)D_UKBB | FinnGen_CVD | rs12798050  | C | T  | -0.048 | 0.004 | 0.009  | 0.008 |
| 25(OH)D_UKBB | FinnGen_CVD | rs12803256  | A | G  | -0.067 | 0.004 | 0.005  | 0.008 |
| 25(OH)D_UKBB | FinnGen_CVD | rs12881545  | G | C  | -0.012 | 0.002 | 0.004  | 0.008 |
| 25(OH)D_UKBB | FinnGen_CVD | rs13060130  | C | T  | 0.017  | 0.003 | 0.018  | 0.010 |



|              |             |             |   |   |        |       |        |       |
|--------------|-------------|-------------|---|---|--------|-------|--------|-------|
| 25(OH)D_UKBB | FinnGen_CVD | rs13104260  | G | A | -0.020 | 0.002 | 0.006  | 0.009 |
| 25(OH)D_UKBB | FinnGen_CVD | rs13284054  | T | C | -0.018 | 0.003 | 0.009  | 0.013 |
| 25(OH)D_UKBB | FinnGen_CVD | rs1352846   | A | G | 0.196  | 0.002 | 0.007  | 0.010 |
| 25(OH)D_UKBB | FinnGen_CVD | rs140371183 | A | G | -0.063 | 0.007 | -0.065 | 0.044 |
| 25(OH)D_UKBB | FinnGen_CVD | rs142158911 | G | A | -0.025 | 0.003 | 0.020  | 0.013 |
| 25(OH)D_UKBB | FinnGen_CVD | rs1660839   | G | A | -0.015 | 0.002 | 0.006  | 0.010 |
| 25(OH)D_UKBB | FinnGen_CVD | rs17216707  | T | C | 0.032  | 0.003 | 0.011  | 0.010 |
| 25(OH)D_UKBB | FinnGen_CVD | rs17231506  | C | T | 0.014  | 0.002 | 0.017  | 0.009 |
| 25(OH)D_UKBB | FinnGen_CVD | rs1800588   | C | T | 0.034  | 0.002 | -0.026 | 0.009 |
| 25(OH)D_UKBB | FinnGen_CVD | rs187429064 | A | G | -0.068 | 0.009 | -0.025 | 0.018 |
| 25(OH)D_UKBB | FinnGen_CVD | rs1933064   | G | A | -0.015 | 0.002 | 0.005  | 0.008 |
| 25(OH)D_UKBB | FinnGen_CVD | rs2012736   | C | A | 0.048  | 0.004 | -0.013 | 0.015 |
| 25(OH)D_UKBB | FinnGen_CVD | rs2037511   | G | A | -0.018 | 0.003 | 0.000  | 0.011 |
| 25(OH)D_UKBB | FinnGen_CVD | rs2074735   | G | C | -0.028 | 0.004 | 0.008  | 0.011 |
| 25(OH)D_UKBB | FinnGen_CVD | rs212100    | T | C | 0.066  | 0.003 | -0.009 | 0.011 |
| 25(OH)D_UKBB | FinnGen_CVD | rs2131925   | G | T | 0.023  | 0.002 | -0.002 | 0.009 |
| 25(OH)D_UKBB | FinnGen_CVD | rs2207132   | G | A | 0.035  | 0.006 | -0.003 | 0.016 |
| 25(OH)D_UKBB | FinnGen_CVD | rs2229742   | G | C | 0.025  | 0.003 | -0.019 | 0.012 |
| 25(OH)D_UKBB | FinnGen_CVD | rs2248551   | G | A | 0.023  | 0.003 | -0.023 | 0.009 |
| 25(OH)D_UKBB | FinnGen_CVD | rs2346264   | A | C | 0.014  | 0.002 | -0.008 | 0.011 |
| 25(OH)D_UKBB | FinnGen_CVD | rs2585442   | C | G | -0.027 | 0.002 | 0.005  | 0.008 |
| 25(OH)D_UKBB | FinnGen_CVD | rs261291    | T | C | 0.028  | 0.002 | -0.008 | 0.008 |
| 25(OH)D_UKBB | FinnGen_CVD | rs2710651   | G | A | 0.011  | 0.002 | 0.005  | 0.008 |
| 25(OH)D_UKBB | FinnGen_CVD | rs2725371   | A | G | -0.012 | 0.002 | 0.026  | 0.009 |
| 25(OH)D_UKBB | FinnGen_CVD | rs2762943   | T | G | -0.045 | 0.004 | -0.016 | 0.013 |
| 25(OH)D_UKBB | FinnGen_CVD | rs28364331  | A | G | -0.070 | 0.007 | 0.015  | 0.070 |
| 25(OH)D_UKBB | FinnGen_CVD | rs28367476  | A | G | 0.014  | 0.002 | 0.004  | 0.008 |
| 25(OH)D_UKBB | FinnGen_CVD | rs28374650  | C | T | 0.013  | 0.002 | 0.014  | 0.010 |
| 25(OH)D_UKBB | FinnGen_CVD | rs2847500   | G | A | 0.022  | 0.003 | -0.015 | 0.011 |
| 25(OH)D_UKBB | FinnGen_CVD | rs28692966  | G | A | -0.015 | 0.002 | 0.021  | 0.008 |
| 25(OH)D_UKBB | FinnGen_CVD | rs2952289   | C | T | -0.018 | 0.002 | -0.013 | 0.010 |

|              |             |            |   |   |        |       |        |       |
|--------------|-------------|------------|---|---|--------|-------|--------|-------|
| 25(OH)D_UKBB | FinnGen_CVD | rs31612    | T | C | 0.015  | 0.003 | -0.001 | 0.009 |
| 25(OH)D_UKBB | FinnGen_CVD | rs325384   | C | T | 0.014  | 0.002 | 0.007  | 0.008 |
| 25(OH)D_UKBB | FinnGen_CVD | rs34290760 | C | G | 0.039  | 0.006 | -0.022 | 0.016 |
| 25(OH)D_UKBB | FinnGen_CVD | rs35057908 | A | T | -0.016 | 0.002 | -0.006 | 0.008 |
| 25(OH)D_UKBB | FinnGen_CVD | rs35408430 | C | T | 0.021  | 0.002 | 0.001  | 0.008 |
| 25(OH)D_UKBB | FinnGen_CVD | rs3814995  | C | T | 0.012  | 0.002 | 0.006  | 0.008 |
| 25(OH)D_UKBB | FinnGen_CVD | rs3849374  | G | C | 0.016  | 0.003 | 0.000  | 0.010 |
| 25(OH)D_UKBB | FinnGen_CVD | rs4121823  | T | A | 0.019  | 0.003 | 0.006  | 0.011 |
| 25(OH)D_UKBB | FinnGen_CVD | rs4327060  | C | T | 0.025  | 0.004 | 0.019  | 0.012 |
| 25(OH)D_UKBB | FinnGen_CVD | rs4364259  | G | A | -0.016 | 0.003 | -0.006 | 0.009 |
| 25(OH)D_UKBB | FinnGen_CVD | rs4418728  | G | T | -0.011 | 0.002 | -0.003 | 0.008 |
| 25(OH)D_UKBB | FinnGen_CVD | rs4575545  | G | A | 0.016  | 0.002 | 0.012  | 0.008 |
| 25(OH)D_UKBB | FinnGen_CVD | rs4616820  | C | T | 0.012  | 0.002 | 0.008  | 0.008 |
| 25(OH)D_UKBB | FinnGen_CVD | rs484195   | A | G | 0.016  | 0.002 | -0.007 | 0.008 |
| 25(OH)D_UKBB | FinnGen_CVD | rs541041   | G | A | 0.016  | 0.003 | 0.000  | 0.010 |
| 25(OH)D_UKBB | FinnGen_CVD | rs55829990 | T | C | 0.019  | 0.002 | 0.006  | 0.008 |
| 25(OH)D_UKBB | FinnGen_CVD | rs590215   | C | T | 0.013  | 0.002 | -0.011 | 0.010 |
| 25(OH)D_UKBB | FinnGen_CVD | rs6003456  | T | A | 0.013  | 0.002 | -0.003 | 0.010 |
| 25(OH)D_UKBB | FinnGen_CVD | rs6123359  | A | G | -0.025 | 0.003 | -0.007 | 0.012 |
| 25(OH)D_UKBB | FinnGen_CVD | rs613808   | A | G | -0.016 | 0.002 | 0.015  | 0.008 |
| 25(OH)D_UKBB | FinnGen_CVD | rs61816761 | G | A | -0.077 | 0.010 | -0.006 | 0.075 |
| 25(OH)D_UKBB | FinnGen_CVD | rs61883501 | A | C | -0.033 | 0.006 | 0.000  | 0.030 |
| 25(OH)D_UKBB | FinnGen_CVD | rs61891388 | T | G | -0.013 | 0.002 | 0.004  | 0.008 |
| 25(OH)D_UKBB | FinnGen_CVD | rs62007299 | G | A | 0.013  | 0.002 | -0.011 | 0.008 |
| 25(OH)D_UKBB | FinnGen_CVD | rs6671730  | G | A | 0.015  | 0.002 | 0.010  | 0.008 |
| 25(OH)D_UKBB | FinnGen_CVD | rs6672758  | C | T | -0.017 | 0.003 | -0.004 | 0.009 |
| 25(OH)D_UKBB | FinnGen_CVD | rs6782190  | G | A | 0.018  | 0.002 | 0.011  | 0.009 |
| 25(OH)D_UKBB | FinnGen_CVD | rs705117   | C | T | -0.032 | 0.003 | -0.002 | 0.012 |
| 25(OH)D_UKBB | FinnGen_CVD | rs7149014  | T | C | 0.013  | 0.002 | 0.001  | 0.008 |
| 25(OH)D_UKBB | FinnGen_CVD | rs727857   | G | A | 0.014  | 0.002 | -0.011 | 0.008 |
| 25(OH)D_UKBB | FinnGen_CVD | rs72834856 | T | G | 0.025  | 0.004 | 0.002  | 0.016 |

|              |               |             |   |   |        |       |        |       |
|--------------|---------------|-------------|---|---|--------|-------|--------|-------|
| 25(OH)D_UKBB | FinnGen_CVD   | rs72997623  | C | A | -0.028 | 0.004 | 0.002  | 0.014 |
| 25(OH)D_UKBB | FinnGen_CVD   | rs73413596  | T | C | -0.022 | 0.004 | 0.032  | 0.017 |
| 25(OH)D_UKBB | FinnGen_CVD   | rs7412      | C | T | -0.030 | 0.004 | 0.039  | 0.017 |
| 25(OH)D_UKBB | FinnGen_CVD   | rs7522116   | C | T | 0.013  | 0.002 | -0.007 | 0.008 |
| 25(OH)D_UKBB | FinnGen_CVD   | rs7528419   | A | G | -0.020 | 0.002 | 0.019  | 0.009 |
| 25(OH)D_UKBB | FinnGen_CVD   | rs7569755   | G | A | -0.014 | 0.002 | -0.017 | 0.009 |
| 25(OH)D_UKBB | FinnGen_CVD   | rs75741381  | C | G | 0.016  | 0.003 | -0.007 | 0.011 |
| 25(OH)D_UKBB | FinnGen_CVD   | rs7604788   | C | T | -0.036 | 0.006 | -0.012 | 0.016 |
| 25(OH)D_UKBB | FinnGen_CVD   | rs76798800  | G | T | 0.017  | 0.002 | -0.013 | 0.009 |
| 25(OH)D_UKBB | FinnGen_CVD   | rs77532868  | C | T | -0.027 | 0.004 | 0.004  | 0.022 |
| 25(OH)D_UKBB | FinnGen_CVD   | rs77924615  | G | A | 0.017  | 0.003 | 0.029  | 0.009 |
| 25(OH)D_UKBB | FinnGen_CVD   | rs78151190  | A | C | 0.017  | 0.003 | -0.015 | 0.013 |
| 25(OH)D_UKBB | FinnGen_CVD   | rs78168201  | C | T | -0.066 | 0.009 | -0.048 | 0.058 |
| 25(OH)D_UKBB | FinnGen_CVD   | rs78649910  | T | A | 0.021  | 0.003 | -0.006 | 0.012 |
| 25(OH)D_UKBB | FinnGen_CVD   | rs8018720   | G | C | 0.038  | 0.003 | 0.000  | 0.011 |
| 25(OH)D_UKBB | FinnGen_CVD   | rs804281    | A | G | -0.015 | 0.002 | 0.015  | 0.011 |
| 25(OH)D_UKBB | FinnGen_CVD   | rs8091117   | C | A | 0.026  | 0.004 | 0.008  | 0.014 |
| 25(OH)D_UKBB | FinnGen_CVD   | rs8113404   | C | T | -0.013 | 0.002 | 0.007  | 0.008 |
| 25(OH)D_UKBB | FinnGen_CVD   | rs867772    | A | G | 0.014  | 0.002 | 0.003  | 0.009 |
| 25(OH)D_UKBB | FinnGen_CVD   | rs9476310   | C | T | -0.012 | 0.002 | 0.003  | 0.008 |
| 25(OH)D_UKBB | FinnGen_CVD   | rs9490317   | T | C | -0.011 | 0.002 | -0.009 | 0.008 |
| 25(OH)D_UKBB | FinnGen_CVD   | rs964184    | G | C | -0.035 | 0.003 | 0.042  | 0.011 |
| 25(OH)D_UKBB | FinnGen_CVD   | rs9861009   | T | C | -0.014 | 0.002 | -0.002 | 0.009 |
| 25(OH)D_UKBB | Longevity_90% | rs6671730   | G | A | 0.015  | 0.002 | -0.056 | 0.022 |
| 25(OH)D_UKBB | Longevity_90% | rs35408430  | C | T | 0.021  | 0.002 | 0.007  | 0.020 |
| 25(OH)D_UKBB | Longevity_90% | rs7522116   | C | T | 0.013  | 0.002 | 0.006  | 0.020 |
| 25(OH)D_UKBB | Longevity_90% | rs11591147  | T | G | 0.045  | 0.007 | 0.150  | 0.110 |
| 25(OH)D_UKBB | Longevity_90% | rs2131925   | G | T | 0.023  | 0.002 | -0.047 | 0.020 |
| 25(OH)D_UKBB | Longevity_90% | rs7528419   | G | A | 0.020  | 0.002 | 0.033  | 0.023 |
| 25(OH)D_UKBB | Longevity_90% | rs140371183 | G | A | 0.063  | 0.007 | 0.061  | 0.082 |
| 25(OH)D_UKBB | Longevity_90% | rs12123821  | T | C | 0.074  | 0.005 | 0.076  | 0.056 |

|              |               |            |   |   |       |       |        |       |
|--------------|---------------|------------|---|---|-------|-------|--------|-------|
| 25(OH)D_UKBB | Longevity_90% | rs1933064  | A | G | 0.015 | 0.002 | -0.009 | 0.021 |
| 25(OH)D_UKBB | Longevity_90% | rs10908419 | G | A | 0.012 | 0.002 | -0.018 | 0.019 |
| 25(OH)D_UKBB | Longevity_90% | rs76798800 | G | T | 0.017 | 0.002 | -0.003 | 0.022 |
| 25(OH)D_UKBB | Longevity_90% | rs11264322 | G | A | 0.013 | 0.002 | 0.009  | 0.020 |
| 25(OH)D_UKBB | Longevity_90% | rs10908465 | T | C | 0.020 | 0.002 | -0.072 | 0.022 |
| 25(OH)D_UKBB | Longevity_90% | rs867772   | A | G | 0.014 | 0.002 | 0.022  | 0.021 |
| 25(OH)D_UKBB | Longevity_90% | rs6672758  | T | C | 0.017 | 0.003 | 0.007  | 0.024 |
| 25(OH)D_UKBB | Longevity_90% | rs7604788  | T | C | 0.036 | 0.006 | 0.075  | 0.054 |
| 25(OH)D_UKBB | Longevity_90% | rs541041   | G | A | 0.016 | 0.003 | 0.047  | 0.025 |
| 25(OH)D_UKBB | Longevity_90% | rs1260326  | C | T | 0.021 | 0.002 | 0.029  | 0.020 |
| 25(OH)D_UKBB | Longevity_90% | rs11127186 | C | T | 0.011 | 0.002 | 0.012  | 0.021 |
| 25(OH)D_UKBB | Longevity_90% | rs727857   | G | A | 0.014 | 0.002 | -0.017 | 0.020 |
| 25(OH)D_UKBB | Longevity_90% | rs2710651  | G | A | 0.011 | 0.002 | 0.021  | 0.019 |
| 25(OH)D_UKBB | Longevity_90% | rs3849374  | G | C | 0.016 | 0.003 | 0.029  | 0.024 |
| 25(OH)D_UKBB | Longevity_90% | rs7569755  | A | G | 0.014 | 0.002 | 0.010  | 0.021 |
| 25(OH)D_UKBB | Longevity_90% | rs1047891  | C | A | 0.015 | 0.002 | -0.009 | 0.022 |
| 25(OH)D_UKBB | Longevity_90% | rs2012736  | C | A | 0.048 | 0.004 | -0.032 | 0.043 |
| 25(OH)D_UKBB | Longevity_90% | rs13060130 | C | T | 0.017 | 0.003 | -0.035 | 0.027 |
| 25(OH)D_UKBB | Longevity_90% | rs6782190  | G | A | 0.018 | 0.002 | 0.013  | 0.020 |
| 25(OH)D_UKBB | Longevity_90% | rs9861009  | C | T | 0.014 | 0.002 | 0.034  | 0.022 |
| 25(OH)D_UKBB | Longevity_90% | rs78649910 | T | A | 0.021 | 0.003 | 0.044  | 0.035 |
| 25(OH)D_UKBB | Longevity_90% | rs4364259  | A | G | 0.016 | 0.003 | -0.021 | 0.029 |
| 25(OH)D_UKBB | Longevity_90% | rs4616820  | C | T | 0.012 | 0.002 | 0.003  | 0.019 |
| 25(OH)D_UKBB | Longevity_90% | rs13104260 | A | G | 0.020 | 0.002 | -0.031 | 0.022 |
| 25(OH)D_UKBB | Longevity_90% | rs705117   | T | C | 0.032 | 0.003 | 0.017  | 0.027 |
| 25(OH)D_UKBB | Longevity_90% | rs1352846  | A | G | 0.196 | 0.002 | -0.013 | 0.021 |
| 25(OH)D_UKBB | Longevity_90% | rs11732896 | G | A | 0.016 | 0.002 | 0.029  | 0.021 |
| 25(OH)D_UKBB | Longevity_90% | rs28364331 | G | A | 0.070 | 0.007 | 0.049  | 0.087 |
| 25(OH)D_UKBB | Longevity_90% | rs1229984  | T | C | 0.047 | 0.006 | 0.122  | 0.053 |
| 25(OH)D_UKBB | Longevity_90% | rs10070734 | C | T | 0.013 | 0.002 | 0.032  | 0.022 |
| 25(OH)D_UKBB | Longevity_90% | rs31612    | T | C | 0.015 | 0.003 | -0.014 | 0.025 |

|              |               |             |   |   |       |       |        |       |
|--------------|---------------|-------------|---|---|-------|-------|--------|-------|
| 25(OH)D_UKBB | Longevity_90% | rs72834856  | T | G | 0.025 | 0.004 | 0.057  | 0.041 |
| 25(OH)D_UKBB | Longevity_90% | rs78151190  | A | C | 0.017 | 0.003 | 0.011  | 0.030 |
| 25(OH)D_UKBB | Longevity_90% | rs9476310   | T | C | 0.012 | 0.002 | -0.046 | 0.020 |
| 25(OH)D_UKBB | Longevity_90% | rs9490317   | C | T | 0.011 | 0.002 | 0.002  | 0.019 |
| 25(OH)D_UKBB | Longevity_90% | rs2248551   | G | A | 0.023 | 0.003 | 0.015  | 0.027 |
| 25(OH)D_UKBB | Longevity_90% | rs10085881  | T | C | 0.015 | 0.002 | 0.012  | 0.022 |
| 25(OH)D_UKBB | Longevity_90% | rs7784802   | T | A | 0.014 | 0.002 | -0.005 | 0.021 |
| 25(OH)D_UKBB | Longevity_90% | rs75741381  | C | G | 0.016 | 0.003 | -0.012 | 0.028 |
| 25(OH)D_UKBB | Longevity_90% | rs6966728   | C | T | 0.012 | 0.002 | 0.009  | 0.019 |
| 25(OH)D_UKBB | Longevity_90% | rs2346264   | A | C | 0.014 | 0.002 | 0.008  | 0.023 |
| 25(OH)D_UKBB | Longevity_90% | rs34290760  | C | G | 0.039 | 0.006 | -0.045 | 0.062 |
| 25(OH)D_UKBB | Longevity_90% | rs804281    | G | A | 0.015 | 0.002 | 0.021  | 0.020 |
| 25(OH)D_UKBB | Longevity_90% | rs28692966  | A | G | 0.015 | 0.002 | -0.028 | 0.022 |
| 25(OH)D_UKBB | Longevity_90% | rs2725371   | G | A | 0.012 | 0.002 | 0.002  | 0.021 |
| 25(OH)D_UKBB | Longevity_90% | rs4738684   | G | A | 0.012 | 0.002 | 0.020  | 0.020 |
| 25(OH)D_UKBB | Longevity_90% | rs12056768  | T | G | 0.025 | 0.002 | -0.007 | 0.020 |
| 25(OH)D_UKBB | Longevity_90% | rs13284054  | C | T | 0.018 | 0.003 | -0.028 | 0.030 |
| 25(OH)D_UKBB | Longevity_90% | rs10887718  | C | T | 0.011 | 0.002 | -0.003 | 0.019 |
| 25(OH)D_UKBB | Longevity_90% | rs77532868  | T | C | 0.027 | 0.004 | 0.005  | 0.050 |
| 25(OH)D_UKBB | Longevity_90% | rs3925446   | A | G | 0.016 | 0.002 | 0.067  | 0.024 |
| 25(OH)D_UKBB | Longevity_90% | rs4418728   | T | G | 0.011 | 0.002 | 0.037  | 0.019 |
| 25(OH)D_UKBB | Longevity_90% | rs61883501  | C | A | 0.033 | 0.006 | -0.120 | 0.071 |
| 25(OH)D_UKBB | Longevity_90% | rs116970203 | G | A | 0.428 | 0.006 | -0.052 | 0.078 |
| 25(OH)D_UKBB | Longevity_90% | rs12794714  | G | A | 0.113 | 0.002 | -0.015 | 0.019 |
| 25(OH)D_UKBB | Longevity_90% | rs61891388  | G | T | 0.013 | 0.002 | -0.035 | 0.019 |
| 25(OH)D_UKBB | Longevity_90% | rs1660839   | A | G | 0.015 | 0.002 | 0.003  | 0.022 |
| 25(OH)D_UKBB | Longevity_90% | rs12803256  | G | A | 0.067 | 0.004 | -0.034 | 0.021 |
| 25(OH)D_UKBB | Longevity_90% | rs12798050  | T | C | 0.048 | 0.004 | 0.007  | 0.025 |
| 25(OH)D_UKBB | Longevity_90% | rs72997623  | A | C | 0.028 | 0.004 | -0.028 | 0.032 |
| 25(OH)D_UKBB | Longevity_90% | rs1149605   | C | T | 0.023 | 0.003 | 0.001  | 0.026 |
| 25(OH)D_UKBB | Longevity_90% | rs964184    | C | G | 0.035 | 0.003 | 0.055  | 0.028 |

|              |               |             |   |   |       |       |        |       |
|--------------|---------------|-------------|---|---|-------|-------|--------|-------|
| 25(OH)D_UKBB | Longevity_90% | rs613808    | G | A | 0.016 | 0.002 | 0.052  | 0.021 |
| 25(OH)D_UKBB | Longevity_90% | rs2847500   | G | A | 0.022 | 0.003 | 0.016  | 0.032 |
| 25(OH)D_UKBB | Longevity_90% | rs12317268  | A | G | 0.021 | 0.003 | -0.016 | 0.026 |
| 25(OH)D_UKBB | Longevity_90% | rs11182428  | T | C | 0.013 | 0.002 | 0.018  | 0.019 |
| 25(OH)D_UKBB | Longevity_90% | rs1038165   | T | C | 0.012 | 0.002 | -0.016 | 0.019 |
| 25(OH)D_UKBB | Longevity_90% | rs10859995  | T | C | 0.044 | 0.002 | 0.003  | 0.019 |
| 25(OH)D_UKBB | Longevity_90% | rs11108368  | G | A | 0.014 | 0.002 | -0.019 | 0.020 |
| 25(OH)D_UKBB | Longevity_90% | rs12372115  | G | T | 0.022 | 0.004 | 0.031  | 0.041 |
| 25(OH)D_UKBB | Longevity_90% | rs73413596  | C | T | 0.022 | 0.004 | 0.016  | 0.038 |
| 25(OH)D_UKBB | Longevity_90% | rs7149014   | T | C | 0.013 | 0.002 | 0.026  | 0.020 |
| 25(OH)D_UKBB | Longevity_90% | rs8018720   | G | C | 0.038 | 0.003 | -0.032 | 0.025 |
| 25(OH)D_UKBB | Longevity_90% | rs12881545  | C | G | 0.012 | 0.002 | 0.019  | 0.021 |
| 25(OH)D_UKBB | Longevity_90% | rs261291    | T | C | 0.028 | 0.002 | -0.038 | 0.021 |
| 25(OH)D_UKBB | Longevity_90% | rs1800588   | C | T | 0.034 | 0.002 | 0.011  | 0.024 |
| 25(OH)D_UKBB | Longevity_90% | rs55829990  | T | C | 0.019 | 0.002 | 0.022  | 0.020 |
| 25(OH)D_UKBB | Longevity_90% | rs62007299  | G | A | 0.013 | 0.002 | 0.033  | 0.021 |
| 25(OH)D_UKBB | Longevity_90% | rs325384    | C | T | 0.014 | 0.002 | -0.011 | 0.022 |
| 25(OH)D_UKBB | Longevity_90% | rs77924615  | G | A | 0.017 | 0.003 | -0.038 | 0.026 |
| 25(OH)D_UKBB | Longevity_90% | rs17231506  | C | T | 0.014 | 0.002 | -0.038 | 0.021 |
| 25(OH)D_UKBB | Longevity_90% | rs11076175  | G | A | 0.018 | 0.003 | -0.016 | 0.026 |
| 25(OH)D_UKBB | Longevity_90% | rs4327060   | C | T | 0.025 | 0.004 | 0.068  | 0.045 |
| 25(OH)D_UKBB | Longevity_90% | rs4575545   | G | A | 0.016 | 0.002 | 0.025  | 0.021 |
| 25(OH)D_UKBB | Longevity_90% | rs11542462  | G | A | 0.024 | 0.003 | 0.041  | 0.035 |
| 25(OH)D_UKBB | Longevity_90% | rs10454087  | C | T | 0.014 | 0.002 | 0.013  | 0.022 |
| 25(OH)D_UKBB | Longevity_90% | rs2952289   | T | C | 0.018 | 0.002 | -0.018 | 0.024 |
| 25(OH)D_UKBB | Longevity_90% | rs8091117   | C | A | 0.026 | 0.004 | -0.002 | 0.037 |
| 25(OH)D_UKBB | Longevity_90% | rs4121823   | T | A | 0.019 | 0.003 | -0.018 | 0.027 |
| 25(OH)D_UKBB | Longevity_90% | rs590215    | C | T | 0.013 | 0.002 | 0.026  | 0.022 |
| 25(OH)D_UKBB | Longevity_90% | rs2037511   | A | G | 0.018 | 0.003 | 0.009  | 0.026 |
| 25(OH)D_UKBB | Longevity_90% | rs142158911 | A | G | 0.025 | 0.003 | 0.082  | 0.032 |
| 25(OH)D_UKBB | Longevity_90% | rs3814995   | C | T | 0.012 | 0.002 | 0.011  | 0.025 |

|              |                    |            |   |   |        |       |        |       |
|--------------|--------------------|------------|---|---|--------|-------|--------|-------|
| 25(OH)D_UKBB | Longevity_90%      | rs7412     | T | C | 0.030  | 0.004 | 0.245  | 0.037 |
| 25(OH)D_UKBB | Longevity_90%      | rs484195   | A | G | 0.016  | 0.002 | 0.095  | 0.022 |
| 25(OH)D_UKBB | Longevity_90%      | rs212100   | T | C | 0.066  | 0.003 | -0.022 | 0.026 |
| 25(OH)D_UKBB | Longevity_90%      | rs10426    | A | G | 0.025  | 0.002 | 0.048  | 0.024 |
| 25(OH)D_UKBB | Longevity_90%      | rs8113404  | T | C | 0.013  | 0.002 | -0.005 | 0.022 |
| 25(OH)D_UKBB | Longevity_90%      | rs11606    | G | C | 0.012  | 0.002 | -0.006 | 0.023 |
| 25(OH)D_UKBB | Longevity_90%      | rs2207132  | G | A | 0.035  | 0.006 | 0.197  | 0.072 |
| 25(OH)D_UKBB | Longevity_90%      | rs6123359  | G | A | 0.025  | 0.003 | 0.016  | 0.032 |
| 25(OH)D_UKBB | Longevity_90%      | rs17216707 | T | C | 0.032  | 0.003 | 0.012  | 0.026 |
| 25(OH)D_UKBB | Longevity_90%      | rs2585442  | G | C | 0.027  | 0.002 | 0.017  | 0.024 |
| 25(OH)D_UKBB | Longevity_90%      | rs2762943  | G | T | 0.045  | 0.004 | -0.039 | 0.056 |
| 25(OH)D_UKBB | Longevity_90%      | rs2229742  | G | C | 0.025  | 0.003 | 0.026  | 0.034 |
| 25(OH)D_UKBB | Longevity_90%      | rs6003456  | T | A | 0.013  | 0.002 | -0.051 | 0.023 |
| 25(OH)D_UKBB | Longevity_90%      | rs2074735  | C | G | 0.028  | 0.004 | -0.013 | 0.039 |
| 25(OH)D_UKBB | Longevity_90%_UKBB | rs10070734 | T | C | -0.013 | 0.002 | -0.077 | 0.029 |
| 25(OH)D_UKBB | Longevity_90%_UKBB | rs10085881 | T | C | 0.015  | 0.002 | 0.019  | 0.029 |
| 25(OH)D_UKBB | Longevity_90%_UKBB | rs1038165  | C | T | -0.012 | 0.002 | -0.015 | 0.027 |
| 25(OH)D_UKBB | Longevity_90%_UKBB | rs10426    | G | A | -0.025 | 0.002 | 0.043  | 0.032 |
| 25(OH)D_UKBB | Longevity_90%_UKBB | rs10454087 | C | T | 0.014  | 0.002 | 0.073  | 0.029 |
| 25(OH)D_UKBB | Longevity_90%_UKBB | rs1047891  | C | A | 0.015  | 0.002 | 0.030  | 0.028 |
| 25(OH)D_UKBB | Longevity_90%_UKBB | rs10859995 | T | C | 0.044  | 0.002 | 0.044  | 0.026 |
| 25(OH)D_UKBB | Longevity_90%_UKBB | rs10887718 | C | T | 0.011  | 0.002 | -0.003 | 0.026 |
| 25(OH)D_UKBB | Longevity_90%_UKBB | rs10908419 | G | A | 0.012  | 0.002 | 0.002  | 0.026 |
| 25(OH)D_UKBB | Longevity_90%_UKBB | rs10908465 | C | T | -0.02  | 0.002 | 0.033  | 0.029 |
| 25(OH)D_UKBB | Longevity_90%_UKBB | rs11076175 | A | G | -0.018 | 0.003 | 0.037  | 0.034 |
| 25(OH)D_UKBB | Longevity_90%_UKBB | rs11108368 | A | G | -0.014 | 0.002 | 0.000  | 0.027 |
| 25(OH)D_UKBB | Longevity_90%_UKBB | rs11127186 | T | C | -0.011 | 0.002 | 0.009  | 0.026 |
| 25(OH)D_UKBB | Longevity_90%_UKBB | rs11182428 | T | C | 0.013  | 0.002 | -0.017 | 0.026 |
| 25(OH)D_UKBB | Longevity_90%_UKBB | rs11264322 | G | A | 0.013  | 0.002 | 0.026  | 0.026 |
| 25(OH)D_UKBB | Longevity_90%_UKBB | rs1149605  | T | C | -0.023 | 0.003 | 0.064  | 0.035 |
| 25(OH)D_UKBB | Longevity_90%_UKBB | rs11542462 | G | A | 0.024  | 0.003 | -0.026 | 0.038 |

|              |                    |             |   |   |        |       |        |       |
|--------------|--------------------|-------------|---|---|--------|-------|--------|-------|
| 25(OH)D_UKBB | Longevity_90%_UKBB | rs115621755 | C | T | 0.012  | 0.002 | 0.009  | 0.028 |
| 25(OH)D_UKBB | Longevity_90%_UKBB | rs11591147  | G | T | -0.045 | 0.007 | -0.208 | 0.100 |
| 25(OH)D_UKBB | Longevity_90%_UKBB | rs11606     | C | G | -0.012 | 0.002 | 0.009  | 0.027 |
| 25(OH)D_UKBB | Longevity_90%_UKBB | rs116970203 | G | A | 0.428  | 0.006 | -0.116 | 0.080 |
| 25(OH)D_UKBB | Longevity_90%_UKBB | rs11732896  | G | A | 0.016  | 0.002 | 0.024  | 0.028 |
| 25(OH)D_UKBB | Longevity_90%_UKBB | rs117576073 | G | T | 0.215  | 0.009 | -0.100 | 0.117 |
| 25(OH)D_UKBB | Longevity_90%_UKBB | rs12056768  | T | G | 0.025  | 0.002 | 0.001  | 0.027 |
| 25(OH)D_UKBB | Longevity_90%_UKBB | rs12123821  | C | T | -0.074 | 0.005 | -0.030 | 0.061 |
| 25(OH)D_UKBB | Longevity_90%_UKBB | rs1229984   | T | C | 0.047  | 0.006 | 0.115  | 0.085 |
| 25(OH)D_UKBB | Longevity_90%_UKBB | rs12317268  | A | G | 0.021  | 0.003 | -0.076 | 0.037 |
| 25(OH)D_UKBB | Longevity_90%_UKBB | rs12372115  | G | T | 0.022  | 0.004 | 0.055  | 0.051 |
| 25(OH)D_UKBB | Longevity_90%_UKBB | rs1260326   | T | C | -0.021 | 0.002 | 0.003  | 0.027 |
| 25(OH)D_UKBB | Longevity_90%_UKBB | rs12794714  | G | A | 0.113  | 0.002 | 0.015  | 0.026 |
| 25(OH)D_UKBB | Longevity_90%_UKBB | rs12803256  | A | G | -0.067 | 0.004 | 0.016  | 0.031 |
| 25(OH)D_UKBB | Longevity_90%_UKBB | rs12881545  | G | C | -0.012 | 0.002 | 0.034  | 0.028 |
| 25(OH)D_UKBB | Longevity_90%_UKBB | rs13060130  | C | T | 0.017  | 0.003 | 0.001  | 0.038 |
| 25(OH)D_UKBB | Longevity_90%_UKBB | rs13104260  | G | A | -0.02  | 0.002 | 0.018  | 0.030 |
| 25(OH)D_UKBB | Longevity_90%_UKBB | rs13284054  | T | C | -0.018 | 0.003 | -0.052 | 0.040 |
| 25(OH)D_UKBB | Longevity_90%_UKBB | rs1352846   | A | G | 0.196  | 0.002 | -0.053 | 0.029 |
| 25(OH)D_UKBB | Longevity_90%_UKBB | rs140371183 | A | G | -0.063 | 0.007 | 0.026  | 0.072 |
| 25(OH)D_UKBB | Longevity_90%_UKBB | rs142158911 | G | A | -0.025 | 0.003 | -0.088 | 0.041 |
| 25(OH)D_UKBB | Longevity_90%_UKBB | rs1660839   | G | A | -0.015 | 0.002 | -0.033 | 0.030 |
| 25(OH)D_UKBB | Longevity_90%_UKBB | rs17216707  | T | C | 0.032  | 0.003 | -0.041 | 0.034 |
| 25(OH)D_UKBB | Longevity_90%_UKBB | rs17231506  | C | T | 0.014  | 0.002 | -0.032 | 0.028 |
| 25(OH)D_UKBB | Longevity_90%_UKBB | rs1800588   | C | T | 0.034  | 0.002 | 0.020  | 0.032 |
| 25(OH)D_UKBB | Longevity_90%_UKBB | rs187429064 | A | G | -0.068 | 0.009 | -0.240 | 0.119 |
| 25(OH)D_UKBB | Longevity_90%_UKBB | rs1933064   | G | A | -0.015 | 0.002 | 0.018  | 0.026 |
| 25(OH)D_UKBB | Longevity_90%_UKBB | rs2037511   | G | A | -0.018 | 0.003 | 0.058  | 0.035 |
| 25(OH)D_UKBB | Longevity_90%_UKBB | rs2074735   | G | C | -0.028 | 0.004 | -0.050 | 0.054 |
| 25(OH)D_UKBB | Longevity_90%_UKBB | rs212100    | T | C | 0.066  | 0.003 | 0.013  | 0.035 |
| 25(OH)D_UKBB | Longevity_90%_UKBB | rs2131925   | G | T | 0.023  | 0.002 | -0.021 | 0.027 |



|              |                    |            |   |   |        |       |        |       |
|--------------|--------------------|------------|---|---|--------|-------|--------|-------|
| 25(OH)D_UKBB | Longevity_90%_UKBB | rs2207132  | G | A | 0.035  | 0.006 | 0.079  | 0.073 |
| 25(OH)D_UKBB | Longevity_90%_UKBB | rs2229742  | G | C | 0.025  | 0.003 | 0.062  | 0.043 |
| 25(OH)D_UKBB | Longevity_90%_UKBB | rs2248551  | G | A | 0.023  | 0.003 | 0.027  | 0.035 |
| 25(OH)D_UKBB | Longevity_90%_UKBB | rs2346264  | A | C | 0.014  | 0.002 | -0.044 | 0.032 |
| 25(OH)D_UKBB | Longevity_90%_UKBB | rs2585442  | C | G | -0.027 | 0.002 | 0.015  | 0.031 |
| 25(OH)D_UKBB | Longevity_90%_UKBB | rs261291   | T | C | 0.028  | 0.002 | -0.019 | 0.027 |
| 25(OH)D_UKBB | Longevity_90%_UKBB | rs2710651  | G | A | 0.011  | 0.002 | -0.011 | 0.026 |
| 25(OH)D_UKBB | Longevity_90%_UKBB | rs2725371  | A | G | -0.012 | 0.002 | -0.055 | 0.028 |
| 25(OH)D_UKBB | Longevity_90%_UKBB | rs2762943  | T | G | -0.045 | 0.004 | 0.046  | 0.049 |
| 25(OH)D_UKBB | Longevity_90%_UKBB | rs28364331 | A | G | -0.07  | 0.007 | 0.091  | 0.098 |
| 25(OH)D_UKBB | Longevity_90%_UKBB | rs28374650 | C | T | 0.013  | 0.002 | -0.059 | 0.035 |
| 25(OH)D_UKBB | Longevity_90%_UKBB | rs2847500  | G | A | 0.022  | 0.003 | 0.025  | 0.040 |
| 25(OH)D_UKBB | Longevity_90%_UKBB | rs28692966 | G | A | -0.015 | 0.002 | -0.007 | 0.030 |
| 25(OH)D_UKBB | Longevity_90%_UKBB | rs2952289  | C | T | -0.018 | 0.002 | -0.050 | 0.032 |
| 25(OH)D_UKBB | Longevity_90%_UKBB | rs31612    | T | C | 0.015  | 0.003 | -0.009 | 0.034 |
| 25(OH)D_UKBB | Longevity_90%_UKBB | rs325384   | C | T | 0.014  | 0.002 | -0.043 | 0.029 |
| 25(OH)D_UKBB | Longevity_90%_UKBB | rs34290760 | C | G | 0.039  | 0.006 | -0.083 | 0.077 |
| 25(OH)D_UKBB | Longevity_90%_UKBB | rs35057908 | A | T | -0.016 | 0.002 | 0.048  | 0.027 |
| 25(OH)D_UKBB | Longevity_90%_UKBB | rs35408430 | C | T | 0.021  | 0.002 | 0.020  | 0.028 |
| 25(OH)D_UKBB | Longevity_90%_UKBB | rs3814995  | C | T | 0.012  | 0.002 | 0.026  | 0.028 |
| 25(OH)D_UKBB | Longevity_90%_UKBB | rs3849374  | G | C | 0.016  | 0.003 | -0.030 | 0.034 |
| 25(OH)D_UKBB | Longevity_90%_UKBB | rs3925446  | G | A | -0.016 | 0.002 | 0.002  | 0.032 |
| 25(OH)D_UKBB | Longevity_90%_UKBB | rs4121823  | T | A | 0.019  | 0.003 | -0.013 | 0.036 |
| 25(OH)D_UKBB | Longevity_90%_UKBB | rs4327060  | C | T | 0.025  | 0.004 | -0.001 | 0.058 |
| 25(OH)D_UKBB | Longevity_90%_UKBB | rs4364259  | G | A | -0.016 | 0.003 | -0.023 | 0.033 |
| 25(OH)D_UKBB | Longevity_90%_UKBB | rs4418728  | G | T | -0.011 | 0.002 | 0.007  | 0.026 |
| 25(OH)D_UKBB | Longevity_90%_UKBB | rs4575545  | G | A | 0.016  | 0.002 | 0.001  | 0.028 |
| 25(OH)D_UKBB | Longevity_90%_UKBB | rs4616820  | C | T | 0.012  | 0.002 | 0.001  | 0.026 |
| 25(OH)D_UKBB | Longevity_90%_UKBB | rs4738684  | A | G | -0.012 | 0.002 | -0.004 | 0.028 |
| 25(OH)D_UKBB | Longevity_90%_UKBB | rs484195   | A | G | 0.016  | 0.002 | 0.173  | 0.028 |
| 25(OH)D_UKBB | Longevity_90%_UKBB | rs541041   | G | A | 0.016  | 0.003 | 0.041  | 0.034 |

|              |                    |            |   |   |        |       |        |       |
|--------------|--------------------|------------|---|---|--------|-------|--------|-------|
| 25(OH)D_UKBB | Longevity_90%_UKBB | rs55829990 | T | C | 0.019  | 0.002 | 0.044  | 0.028 |
| 25(OH)D_UKBB | Longevity_90%_UKBB | rs590215   | C | T | 0.013  | 0.002 | 0.064  | 0.030 |
| 25(OH)D_UKBB | Longevity_90%_UKBB | rs6003456  | T | A | 0.013  | 0.002 | 0.013  | 0.031 |
| 25(OH)D_UKBB | Longevity_90%_UKBB | rs6123359  | A | G | -0.025 | 0.003 | 0.025  | 0.043 |
| 25(OH)D_UKBB | Longevity_90%_UKBB | rs613808   | A | G | -0.016 | 0.002 | 0.036  | 0.029 |
| 25(OH)D_UKBB | Longevity_90%_UKBB | rs61816761 | G | A | -0.077 | 0.01  | -0.047 | 0.091 |
| 25(OH)D_UKBB | Longevity_90%_UKBB | rs61883501 | A | C | -0.033 | 0.006 | 0.034  | 0.074 |
| 25(OH)D_UKBB | Longevity_90%_UKBB | rs61891388 | T | G | -0.013 | 0.002 | -0.082 | 0.026 |
| 25(OH)D_UKBB | Longevity_90%_UKBB | rs62007299 | G | A | 0.013  | 0.002 | 0.084  | 0.029 |
| 25(OH)D_UKBB | Longevity_90%_UKBB | rs6671730  | G | A | 0.015  | 0.002 | -0.075 | 0.026 |
| 25(OH)D_UKBB | Longevity_90%_UKBB | rs6672758  | C | T | -0.017 | 0.003 | -0.028 | 0.033 |
| 25(OH)D_UKBB | Longevity_90%_UKBB | rs6782190  | G | A | 0.018  | 0.002 | 0.022  | 0.027 |
| 25(OH)D_UKBB | Longevity_90%_UKBB | rs6966728  | C | T | 0.012  | 0.002 | 0.022  | 0.026 |
| 25(OH)D_UKBB | Longevity_90%_UKBB | rs705117   | C | T | -0.032 | 0.003 | 0.003  | 0.037 |
| 25(OH)D_UKBB | Longevity_90%_UKBB | rs7149014  | T | C | 0.013  | 0.002 | -0.007 | 0.028 |
| 25(OH)D_UKBB | Longevity_90%_UKBB | rs727857   | G | A | 0.014  | 0.002 | 0.029  | 0.027 |
| 25(OH)D_UKBB | Longevity_90%_UKBB | rs72834856 | T | G | 0.025  | 0.004 | 0.067  | 0.050 |
| 25(OH)D_UKBB | Longevity_90%_UKBB | rs72997623 | C | A | -0.028 | 0.004 | -0.044 | 0.047 |
| 25(OH)D_UKBB | Longevity_90%_UKBB | rs73413596 | T | C | -0.022 | 0.004 | -0.034 | 0.050 |
| 25(OH)D_UKBB | Longevity_90%_UKBB | rs7412     | C | T | -0.03  | 0.004 | -0.247 | 0.048 |
| 25(OH)D_UKBB | Longevity_90%_UKBB | rs7522116  | C | T | 0.013  | 0.002 | -0.079 | 0.026 |
| 25(OH)D_UKBB | Longevity_90%_UKBB | rs7528419  | A | G | -0.02  | 0.002 | -0.101 | 0.031 |
| 25(OH)D_UKBB | Longevity_90%_UKBB | rs7569755  | G | A | -0.014 | 0.002 | -0.022 | 0.029 |
| 25(OH)D_UKBB | Longevity_90%_UKBB | rs75741381 | C | G | 0.016  | 0.003 | 0.039  | 0.037 |
| 25(OH)D_UKBB | Longevity_90%_UKBB | rs7604788  | C | T | -0.036 | 0.006 | -0.043 | 0.073 |
| 25(OH)D_UKBB | Longevity_90%_UKBB | rs76798800 | G | T | 0.017  | 0.002 | -0.043 | 0.030 |
| 25(OH)D_UKBB | Longevity_90%_UKBB | rs77532868 | C | T | -0.027 | 0.004 | -0.033 | 0.058 |
| 25(OH)D_UKBB | Longevity_90%_UKBB | rs7784802  | A | T | -0.014 | 0.002 | -0.053 | 0.027 |
| 25(OH)D_UKBB | Longevity_90%_UKBB | rs77924615 | G | A | 0.017  | 0.003 | -0.020 | 0.033 |
| 25(OH)D_UKBB | Longevity_90%_UKBB | rs78151190 | A | C | 0.017  | 0.003 | 0.071  | 0.039 |
| 25(OH)D_UKBB | Longevity_90%_UKBB | rs78168201 | C | T | -0.066 | 0.009 | -0.041 | 0.101 |

|              |                    |            |   |   |        |       |        |       |
|--------------|--------------------|------------|---|---|--------|-------|--------|-------|
| 25(OH)D_UKBB | Longevity_90%_UKBB | rs78649910 | T | A | 0.021  | 0.003 | 0.056  | 0.042 |
| 25(OH)D_UKBB | Longevity_90%_UKBB | rs8018720  | G | C | 0.038  | 0.003 | -0.042 | 0.034 |
| 25(OH)D_UKBB | Longevity_90%_UKBB | rs804281   | A | G | -0.015 | 0.002 | 0.026  | 0.027 |
| 25(OH)D_UKBB | Longevity_90%_UKBB | rs8091117  | C | A | 0.026  | 0.004 | -0.094 | 0.053 |
| 25(OH)D_UKBB | Longevity_90%_UKBB | rs8113404  | C | T | -0.013 | 0.002 | -0.022 | 0.028 |
| 25(OH)D_UKBB | Longevity_90%_UKBB | rs867772   | A | G | 0.014  | 0.002 | -0.018 | 0.028 |
| 25(OH)D_UKBB | Longevity_90%_UKBB | rs9476310  | C | T | -0.012 | 0.002 | -0.011 | 0.026 |
| 25(OH)D_UKBB | Longevity_90%_UKBB | rs9490317  | T | C | -0.011 | 0.002 | 0.031  | 0.026 |
| 25(OH)D_UKBB | Longevity_90%_UKBB | rs964184   | G | C | -0.035 | 0.003 | -0.022 | 0.038 |
| 25(OH)D_UKBB | Longevity_90%_UKBB | rs9861009  | T | C | -0.014 | 0.002 | 0.002  | 0.029 |

EA, effect allele; NEA, non-effect allele; SNP, single nucleotide polymorphism.
